# Supplementary material
Source: PubMed Central journal article supplement (PMC5359498)
Supplement: AEM.03085-16_zam999117733s1.pdf [file AEM.03085-16_zam999117733s1.pdf]

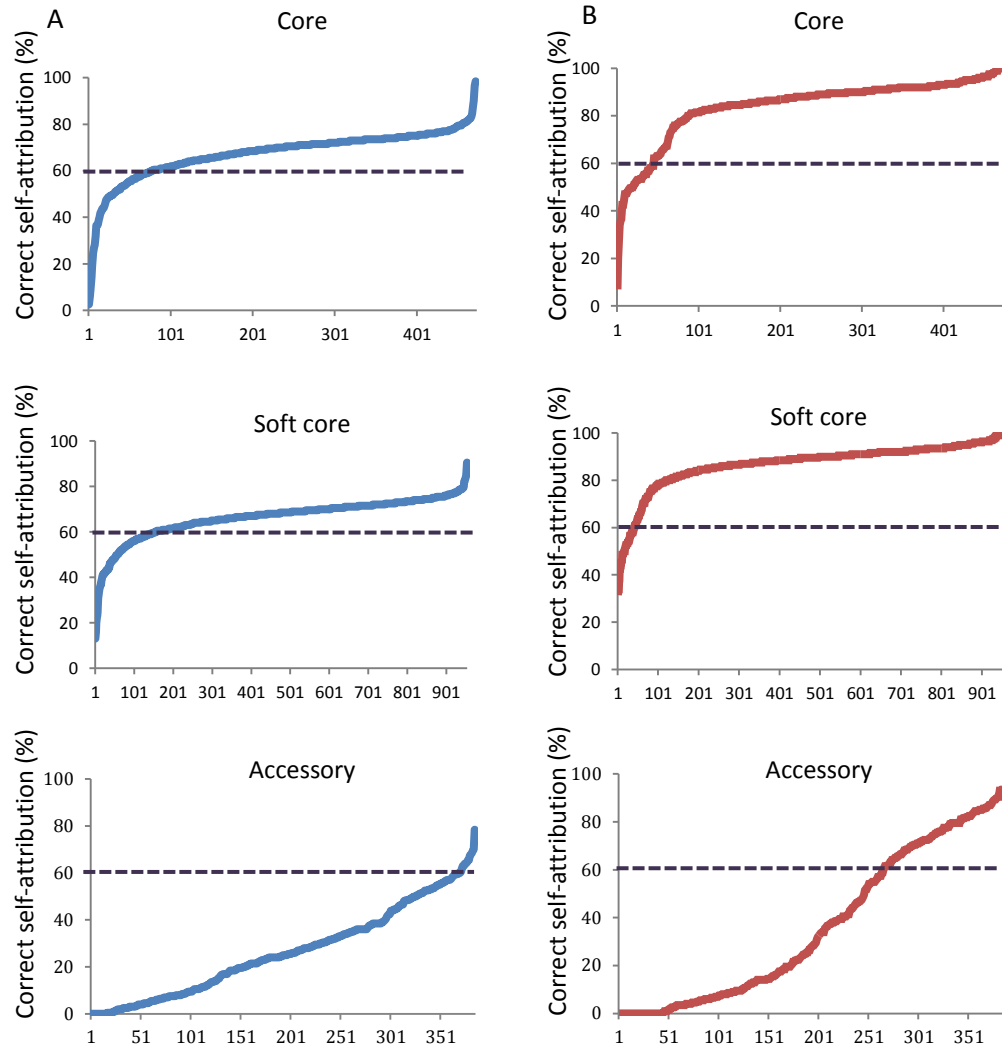

**Figure S1. Contribution of each locus within the core, soft-core and accessory genome to correct host assignment in self-attribution of chicken and ruminant isolates of *C. jejuni*.** Each circle represents the contribution of one locus to identify correctly the original host of isolates from chicken (A) and ruminant (B). Loci are ordered according to their contribution to host assignment in the different populations to have an overall representation of host-segregating power of loci within the core, soft-core and accessory genomes. The dashed line represents the threshold of 60% of correct self-attribution used for the selection of candidates as host-segregating markers.

**Table S1. Description of the 884 sequenced isolates of *C. jejuni* used in the study**

| Identifier | Strain name  | Population  | Source                | Country     | Year of isolation | Sequence type <sup>a</sup> | Clonal complex <sup>b</sup> | Reference           | Accession numbers |
|------------|--------------|-------------|-----------------------|-------------|-------------------|----------------------------|-----------------------------|---------------------|-------------------|
| 4          | CAMP45       | chicken     | chicken offal or meat | UK          | 2005              | ST 45                      | ST-45 complex               | Yahara et al 2016   | -                 |
| 14         | CAMP2381     | environment | environmental waters  | New Zealand | -                 | ST 2381                    | -                           | Sheppard et al 2013 | -                 |
| 22         | CAMP2488     | chicken     | chicken               | UK          | 2001              | ST 257                     | ST-257 complex              | Sheppard et al 2013 | -                 |
| 32         | CampsClin11  | human       | human unspecified     | UK          | 2005              | ST 11                      | ST-45 complex               | Yahara et al 2016   | -                 |
| 34         | CampsClin262 | human       | human unspecified     | UK          | 2005              | ST 262                     | ST-21 complex               | Yahara et al 2016   | -                 |
| 36         | CampsClin266 | human       | human unspecified     | UK          | 2006              | ST 266                     | ST-21 complex               | Yahara et al 2016   | -                 |
| 37         | CampsClin883 | human       | human unspecified     | UK          | 2006              | ST 883                     | ST-21 complex               | Yahara et al 2016   | -                 |
| 39         | chick2219    | chicken     | chicken offal or meat | UK          | 2005              | ST 2219                    | ST-45 complex               | Yahara et al 2016   | -                 |
| 40         | chicka21     | chicken     | chicken offal or meat | UK          | 2006              | ST 21                      | ST-21 complex               | Yahara et al 2016   | -                 |
| 45         | chick594     | chicken     | chicken offal or meat | UK          | 2006              | ST 583                     | ST-45 complex               | Yahara et al 2016   | -                 |
| 54         | chick267     | chicken     | chicken offal or meat | UK          | 2005              | ST 267                     | ST-283 complex              | Yahara et al 2016   | -                 |
| 55         | CampsClin230 | human       | human unspecified     | UK          | 2006              | ST 230                     | ST-45 complex               | Yahara et al 2016   | -                 |
| 57         | chick2213    | chicken     | chicken offal or meat | UK          | 2005              | ST 334                     | ST-45 complex               | Yahara et al 2016   | -                 |

|    |             |         |                       |    |      |         |                |                     |   |
|----|-------------|---------|-----------------------|----|------|---------|----------------|---------------------|---|
| 60 | CampsClin53 | human   | human unspecified     | UK | 2005 | ST 53   | ST-21 complex  | Yahara et al 2016   | - |
| 63 | chickc21    | chicken | chicken offal or meat | UK | 2006 | ST 21   | ST-21 complex  | Yahara et al 2016   | - |
| 64 | chick25     | chicken | chicken offal or meat | UK | 2006 | ST 814  | ST-661 complex | Yahara et al 2016   | - |
| 65 | chick104    | chicken | chicken offal or meat | UK | 2006 | ST 104  | ST-21 complex  | Yahara et al 2016   | - |
| 66 | chick353    | chicken | chicken               | UK | 2009 | ST 353  | ST-353 complex | Yahara et al 2016   | - |
| 67 | chickb354   | chicken | chicken               | UK | 2009 | ST 354  | ST-354 complex | Yahara et al 2016   | - |
| 68 | chick573    | chicken | chicken               | UK | 2009 | ST 573  | ST-573 complex | Sheppard et al 2013 | - |
| 69 | chick2568   | chicken | chicken               | UK | 2009 | ST 2568 | ST-661 complex | Sheppard et al 2013 | - |
| 70 | chickc45    | chicken | chicken               | UK | 2009 | ST 45   | ST-45 complex  | Yahara et al 2016   | - |
| 71 | chick19     | chicken | chicken               | UK | 2009 | ST 50   | ST-21 complex  | Yahara et al 2016   | - |
| 72 | chick50     | chicken | chicken               | UK | 2009 | ST 50   | ST-21 complex  | Yahara et al 2016   | - |
| 73 | chick53     | chicken | chicken               | UK | 2009 | ST 53   | ST-21 complex  | Yahara et al 2016   | - |
| 74 | chick262    | chicken | chicken               | UK | 2009 | ST 262  | ST-21 complex  | Yahara et al 2016   | - |
| 75 | chick266    | chicken | chicken               | UK | 2009 | ST 266  | ST-21 complex  | Yahara et al 2016   | - |
| 77 | chick1086   | chicken | chicken               | UK | 2009 | ST 50   | ST-21 complex  | Yahara et al 2016   | - |
| 78 | chick1360   | chicken | chicken               | UK | 2009 | ST 50   | ST-21 complex  | Yahara et al 2016   | - |

|     |           |          |         |    |      |         |                |                     |   |
|-----|-----------|----------|---------|----|------|---------|----------------|---------------------|---|
| 79  | chick11   | chicken  | chicken | UK | 2009 | ST 11   | ST-45 complex  | Yahara et al 2016   | - |
| 80  | chick137  | chicken  | chicken | UK | 2009 | ST 2030 | ST-257 complex | Yahara et al 2016   | - |
| 81  | chick1003 | chicken  | chicken | UK | 2009 | ST 1003 | ST-45 complex  | Yahara et al 2016   | - |
| 82  | chick2048 | chicken  | chicken | UK | 2009 | ST 45   | ST-45 complex  | Yahara et al 2016   | - |
| 83  | chick2197 | chicken  | chicken | UK | 2009 | ST 354  | ST-354 complex | Yahara et al 2016   | - |
| 84  | chick2223 | chicken  | chicken | UK | 2009 | ST 45   | ST-45 complex  | Yahara et al 2016   | - |
| 104 | cow3214   | ruminant | cattle  | UK | 2003 | ST 45   | ST-45 complex  | Sheppard et al 2013 | - |
| 105 | chick354  | chicken  | chicken | UK | 2004 | ST 257  | ST-257 complex | Yahara et al 2016   | - |
| 106 | chick51   | chicken  | chicken | UK | 2005 | ST 51   | ST-443 complex | Yahara et al 2016   | - |
| 107 | chick1079 | chicken  | chicken | UK | 2004 | ST 1079 | ST-573 complex | Sheppard et al 2013 | - |
| 108 | chick574  | chicken  | chicken | UK | 2004 | ST 574  | ST-574 complex | Yahara et al 2016   | - |
| 109 | chick814  | chicken  | chicken | UK | 2004 | ST 814  | ST-661 complex | Sheppard et al 2013 | - |
| 110 | chickb21  | chicken  | chicken | UK | 2003 | ST 21   | ST-21 complex  | Yahara et al 2016   | - |
| 111 | chickb45  | chicken  | chicken | UK | 2004 | ST 45   | ST-45 complex  | Yahara et al 2016   | - |
| 112 | chickd45  | chicken  | chicken | UK | 2004 | ST 45   | ST-45 complex  | Yahara et al 2016   | - |
| 113 | chick883  | chicken  | chicken | UK | 2004 | ST 883  | ST-21 complex  | Yahara et al 2016   | - |

|     |              |             |                       |         |      |         |                 |                     |   |
|-----|--------------|-------------|-----------------------|---------|------|---------|-----------------|---------------------|---|
| 114 | chick230     | chicken     | chicken               | UK      | 2004 | ST 230  | ST-45 complex   | Yahara et al 2016   | - |
| 115 | chick2663    | chicken     | chicken offal or meat | UK      | 2006 | ST 2663 | ST-45 complex   | Yahara et al 2016   | - |
| 117 | OxClina21    | human       | human unspecified     | UK      | 2003 | ST 21   | ST-21 complex   | Yahara et al 2016   | - |
| 119 | OxClina45    | human       | human unspecified     | UK      | 2003 | ST 45   | ST-45 complex   | Yahara et al 2016   | - |
| 122 | starling177  | environment | starling              | UK      | -    | ST 177  | ST-177 complex  | Sheppard et al 2013 | - |
| 123 | starling682  | environment | starling              | UK      | -    | ST 682  | ST-682 complex  | Sheppard et al 2013 | - |
| 124 | starling45   | environment | starling              | UK      | -    | ST 45   | ST-45 complex   | Sheppard et al 2013 | - |
| 125 | starling1020 | environment | starling              | UK      | -    | ST 1020 | ST-682 complex  | Sheppard et al 2013 | - |
| 126 | goose1033    | environment | goose                 | UK      | -    | ST 1033 | ST-1034 complex | Sheppard et al 2013 | - |
| 128 | goose137     | environment | goose                 | UK      | -    | ST 137  | ST-45 complex   | Sheppard et al 2013 | - |
| 129 | goose696     | environment | goose                 | UK      | -    | ST 696  | ST-1332 complex | Sheppard et al 2013 | - |
| 130 | duck702      | environment | duck                  | UK      | -    | ST 702  | ST-702 complex  | Sheppard et al 2013 | - |
| 131 | duck45       | environment | duck                  | UK      | -    | ST 45   | ST-45 complex   | Sheppard et al 2013 | - |
| 172 | Cj129-258    | ruminant    | cattle                | USA     | -    | ST 459  | ST-42 complex   | Sheppard et al 2013 | - |
| 173 | Cj51494      | chicken     | poultry               | USA     | -    | ST 4834 | ST-353 complex  | Sheppard et al 2013 | - |
| 174 | CjLMG23216   | chicken     | poultry               | Belgium | -    | ST 4835 | -               | Sheppard et al 2013 | - |

|     |               |          |                   |               |   |         |                |                     |   |
|-----|---------------|----------|-------------------|---------------|---|---------|----------------|---------------------|---|
| 175 | CjLMG23218    | chicken  | poultry           | Belgium       | - | ST 48   | ST-48 complex  | Sheppard et al 2013 | - |
| 176 | CjLMG23223    | chicken  | poultry           | Belgium       | - | ST 791  | -              | Sheppard et al 2013 | - |
| 177 | CjLMG23263    | chicken  | poultry           | Bosnia        | - | ST 3504 | ST-446 complex | Sheppard et al 2013 | - |
| 178 | Cj60004       | chicken  | poultry           | USA           | - | ST 4836 | -              | Sheppard et al 2013 | - |
| 180 | CjLMG23269    | chicken  | poultry           | Belgium       | - | ST 4837 | ST-353 complex | Sheppard et al 2013 | - |
| 181 | Cj55037       | chicken  | poultry           | USA           | - | ST 45   | ST-45 complex  | Sheppard et al 2013 | - |
| 182 | CjLMG9879     | human    | human unspecified | Canada        | - | ST 47   | ST-21 complex  | Yahara et al 2016   | - |
| 183 | Cj86605       | chicken  | poultry           | USA           | - | ST 4840 | ST-48 complex  | Sheppard et al 2013 | - |
| 185 | CjATCC33560 T | ruminant | cattle            | Belgium       | - | ST 403  | ST-403 complex | Sheppard et al 2013 | - |
| 186 | CjLMG9081     | human    | human unspecified | South America | - | ST 52   | ST-52 complex  | Yahara et al 2016   | - |
| 187 | Cj53161       | chicken  | poultry           | USA           | - | ST 4838 | ST-353 complex | Sheppard et al 2013 | - |
| 188 | CjLMG9217     | human    | human unspecified | Belgium       | - | ST 443  | ST-443 complex | Yahara et al 2016   | - |
| 189 | Cj2008-1025   | human    | human unspecified | France        | - | ST 50   | ST-21 complex  | Yahara et al 2016   | - |
| 195 | Cj2008-831    | human    | human unspecified | France        | - | ST 50   | ST-21 complex  | Yahara et al 2016   | - |
| 196 | Cj1997-4      | human    | human unspecified | USA           | - | ST 475  | ST-48 complex  | Yahara et al 2016   | - |
| 200 | Cj1997-14     | human    | human unspecified | USA           | - | ST 5159 | ST-353 complex | Yahara et al 2016   | - |

|     |            |          |             |         |      |         |                |                     |   |
|-----|------------|----------|-------------|---------|------|---------|----------------|---------------------|---|
| 201 | Cj51037    | chicken  | poultry     | USA     | -    | ST 939  | ST-353 complex | Sheppard et al 2013 | - |
| 202 | Cj110-21   | ruminant | cattle      | USA     | -    | ST 982  | ST-21 complex  | Sheppard et al 2013 | - |
| 203 | Cj87330    | chicken  | poultry     | USA     | -    | ST 50   | ST-21 complex  | Sheppard et al 2013 | - |
| 204 | Cj87459    | chicken  | poultry     | USA     | -    | ST 452  | ST-353 complex | Sheppard et al 2013 | - |
| 205 | Cj140-16   | ruminant | cattle      | USA     | -    | ST 5161 | ST-61 complex  | Sheppard et al 2013 | - |
| 206 | Cj1213     | ruminant | cattle      | USA     | -    | ST 132  | ST-508 complex | Sheppard et al 2013 | - |
| 208 | Cj1798     | ruminant | cattle      | USA     | -    | ST 61   | ST-61 complex  | Sheppard et al 2013 | - |
| 209 | Cj1854     | ruminant | cattle      | USA     | -    | ST 922  | -              | Sheppard et al 2013 | - |
| 210 | Cj1893     | ruminant | cattle      | USA     | -    | ST 38   | ST-48 complex  | Sheppard et al 2013 | - |
| 211 | Cj1928     | ruminant | cattle      | USA     | -    | ST 806  | ST-21 complex  | Sheppard et al 2013 | - |
| 213 | Cj23210    | chicken  | poultry     | Belgium | -    | ST 380  | -              | Sheppard et al 2013 | - |
| 214 | CjLMG23211 | chicken  | poultry     | Belgium | -    | ST 220  | ST-179 complex | Sheppard et al 2013 | - |
| 252 | Cj_283     | chicken  | chick       | UK      | -    | ST 267  | ST-283 complex | Sheppard et al 2014 | - |
| 254 | Hn129      | human    | human stool | UK      | 2003 | ST 19   | ST-21 complex  | Yahara et al 2016   | - |
| 255 | Hn30       | human    | human stool | UK      | 2003 | ST 50   | ST-21 complex  | Yahara et al 2016   | - |
| 256 | Hn39       | human    | human stool | UK      | 2003 | ST 53   | ST-21 complex  | Yahara et al 2016   | - |

|     |        |             |                      |    |      |         |                |                     |   |
|-----|--------|-------------|----------------------|----|------|---------|----------------|---------------------|---|
| 257 | Hn4    | human       | human stool          | UK | 2003 | ST 104  | ST-21 complex  | Yahara et al 2016   | - |
| 258 | Hn123  | human       | human stool          | UK | 2003 | ST 262  | ST-21 complex  | Yahara et al 2016   | - |
| 259 | Hn4503 | human       | human stool          | UK | 2009 | ST 19   | ST-21 complex  | Yahara et al 2016   | - |
| 260 | Hn4249 | human       | human stool          | UK | 2009 | ST 50   | ST-21 complex  | Yahara et al 2016   | - |
| 261 | Hn4075 | human       | human stool          | UK | 2009 | ST 104  | ST-21 complex  | Yahara et al 2016   | - |
| 262 | Hn3817 | human       | human stool          | UK | 2008 | ST 262  | ST-21 complex  | Yahara et al 2016   | - |
| 268 | 13257  | human       | human stool          | UK | 1999 | ST 45   | ST-45 complex  | Yahara et al 2016   | - |
| 269 | 13258  | ruminant    | lamb offal or meat   | UK | 1998 | ST 48   | ST-48 complex  | Sheppard et al 2014 | - |
| 271 | 13260  | ruminant    | lamb offal or meat   | UK | 1998 | -       | -              | Sheppard et al 2014 | - |
| 273 | 13262  | environment | sand (bathing beach) | UK | 1994 | ST 177  | ST-177 complex | Sheppard et al 2014 | - |
| 275 | 13264  | human       | human stool          | UK | 1999 | ST 257  | ST-257 complex | Yahara et al 2016   | - |
| 276 | 13265  | human       | human stool          | UK | 1991 | ST 354  | ST-354 complex | Yahara et al 2016   | - |
| 278 | SS_060 | chicken     | carcass swab         | UK | 2008 | ST 4468 | ST-661 complex | Yahara et al 2016   | - |
| 280 | SS_068 | chicken     | carcass swab         | UK | 2008 | ST 449  | -              | Yahara et al 2016   | - |
| 281 | SS_069 | chicken     | carcass swab         | UK | 2008 | ST 574  | ST-574 complex | Yahara et al 2016   | - |
| 283 | SS_077 | chicken     | carcass swab         | UK | 2008 | ST 48   | ST-48 complex  | Yahara et al 2016   | - |



|     |        |         |              |    |      |         |                |                   |   |
|-----|--------|---------|--------------|----|------|---------|----------------|-------------------|---|
| 285 | SS_092 | chicken | carcass swab | UK | 2008 | ST 353  | ST-353 complex | Yahara et al 2016 | - |
| 286 | SS_121 | chicken | carcass swab | UK | 2008 | ST 2030 | ST-257 complex | Yahara et al 2016 | - |
| 288 | SS_133 | chicken | carcass swab | UK | 2008 | ST 137  | ST-45 complex  | Yahara et al 2016 | - |
| 290 | SS_153 | chicken | carcass swab | UK | 2008 | ST 21   | ST-21 complex  | Yahara et al 2016 | - |
| 295 | SS_174 | chicken | carcass swab | UK | 2008 | ST 3895 | ST-353 complex | Yahara et al 2016 | - |
| 298 | SS_199 | chicken | carcass swab | UK | 2008 | ST 4454 | -              | Yahara et al 2016 | - |
| 299 | SS_202 | chicken | carcass swab | UK | 2008 | ST 257  | ST-257 complex | Yahara et al 2016 | - |
| 300 | SS_204 | chicken | carcass swab | UK | 2008 | ST 354  | ST-354 complex | Yahara et al 2016 | - |
| 301 | SS_208 | chicken | carcass swab | UK | 2008 | ST 464  | ST-464 complex | Yahara et al 2016 | - |
| 302 | SS_210 | chicken | carcass swab | UK | 2008 | ST 1489 | ST-354 complex | Yahara et al 2016 | - |
| 303 | SS_214 | chicken | carcass swab | UK | 2008 | ST 48   | ST-48 complex  | Yahara et al 2016 | - |
| 304 | SS_216 | chicken | carcass swab | UK | 2008 | ST 51   | ST-443 complex | Yahara et al 2016 | - |
| 306 | SS_223 | chicken | carcass swab | UK | 2008 | ST 702  | ST-702 complex | Yahara et al 2016 | - |
| 308 | SS_242 | chicken | carcass swab | UK | 2008 | ST 354  | ST-354 complex | Yahara et al 2016 | - |
| 309 | SS_249 | chicken | carcass swab | UK | 2008 | ST 45   | ST-45 complex  | Yahara et al 2016 | - |
| 311 | SS_256 | chicken | carcass swab | UK | 2008 | ST 257  | ST-257 complex | Yahara et al 2016 | - |

|     |        |          |               |    |      |         |                 |                   |   |
|-----|--------|----------|---------------|----|------|---------|-----------------|-------------------|---|
| 312 | SS_257 | chicken  | carcass swab  | UK | 2008 | ST 583  | ST-45 complex   | Yahara et al 2016 | - |
| 315 | SS_300 | chicken  | carcass swab  | UK | 2008 | ST 573  | ST-573 complex  | Yahara et al 2016 | - |
| 317 | SS_307 | chicken  | carcass swab  | UK | 2008 | ST 775  | ST-52 complex   | Yahara et al 2016 | - |
| 320 | SS_313 | chicken  | carcass swab  | UK | 2008 | ST 19   | ST-21 complex   | Yahara et al 2016 | - |
| 321 | SS_315 | chicken  | carcass swab  | UK | 2008 | ST 45   | ST-45 complex   | Yahara et al 2016 | - |
| 323 | SS_320 | chicken  | carcass swab  | UK | 2008 | ST 607  | ST-607 complex  | Yahara et al 2016 | - |
| 324 | SS_322 | chicken  | carcass swab  | UK | 2008 | ST 45   | ST-45 complex   | Yahara et al 2016 | - |
| 325 | SS_002 | ruminant | cattle        | UK | 2006 | ST 19   | ST-21 complex   | Yahara et al 2016 | - |
| 329 | SS_063 | chicken  | caecal sample | UK | 2008 | ST 2314 | ST-1034 complex | Yahara et al 2016 | - |
| 330 | SS_065 | chicken  | caecal sample | UK | 2008 | ST 2030 | ST-257 complex  | Yahara et al 2016 | - |
| 331 | SS_066 | chicken  | caecal sample | UK | 2008 | ST 2135 | ST-21 complex   | Yahara et al 2016 | - |
| 334 | SS_071 | chicken  | caecal sample | UK | 2009 | ST 267  | ST-283 complex  | Yahara et al 2016 | - |
| 336 | SS_079 | chicken  | caecal sample | UK | 2008 | ST 2030 | ST-257 complex  | Yahara et al 2016 | - |
| 337 | SS_081 | chicken  | caecal sample | UK | 2008 | ST 574  | ST-574 complex  | Yahara et al 2016 | - |
| 339 | SS_084 | chicken  | caecal sample | UK | 2007 | ST 775  | ST-52 complex   | Yahara et al 2016 | - |
| 340 | SS_086 | chicken  | caecal sample | UK | 2009 | ST 257  | ST-257 complex  | Yahara et al 2016 | - |

|     |        |         |               |    |      |         |                 |                   |   |
|-----|--------|---------|---------------|----|------|---------|-----------------|-------------------|---|
| 342 | SS_091 | chicken | caecal sample | UK | 2009 | ST 583  | ST-45 complex   | Yahara et al 2016 | - |
| 344 | SS_100 | chicken | caecal sample | UK | 2009 | ST 3895 | ST-353 complex  | Yahara et al 2016 | - |
| 345 | SS_105 | chicken | caecal sample | UK | 2008 | ST 3009 | ST-433 complex  | Yahara et al 2016 | - |
| 347 | SS_107 | chicken | caecal sample | UK | 2008 | ST 48   | ST-48 complex   | Yahara et al 2016 | - |
| 348 | SS_110 | chicken | caecal sample | UK | 2009 | ST 464  | ST-464 complex  | Yahara et al 2016 | - |
| 349 | SS_113 | chicken | caecal sample | UK | 2009 | ST 573  | ST-573 complex  | Yahara et al 2016 | - |
| 351 | SS_116 | chicken | caecal sample | UK | 2009 | ST 2135 | ST-21 complex   | Yahara et al 2016 | - |
| 355 | SS_123 | chicken | caecal sample | UK | 2009 | ST 257  | ST-257 complex  | Yahara et al 2016 | - |
| 356 | SS_128 | chicken | caecal sample | UK | 2007 | -       | -               | Yahara et al 2016 | - |
| 357 | SS_131 | chicken | caecal sample | UK | 2008 | ST 4460 | ST-661 complex  | Yahara et al 2016 | - |
| 359 | SS_139 | chicken | caecal sample | UK | 2008 | ST 50   | ST-21 complex   | Yahara et al 2016 | - |
| 360 | SS_141 | chicken | caecal sample | UK | 2008 | ST 573  | ST-573 complex  | Yahara et al 2016 | - |
| 364 | SS_147 | chicken | caecal sample | UK | 2009 | ST 863  | ST-607 complex  | Yahara et al 2016 | - |
| 365 | SS_149 | chicken | caecal sample | UK | 2007 | ST 2314 | ST-1034 complex | Yahara et al 2016 | - |
| 367 | SS_152 | chicken | caecal sample | UK | 2009 | ST 2786 | ST-661 complex  | Yahara et al 2016 | - |
| 368 | SS_154 | chicken | caecal sample | UK | 2009 | ST 48   | ST-48 complex   | Yahara et al 2016 | - |

|     |        |         |               |    |      |         |                 |                   |   |
|-----|--------|---------|---------------|----|------|---------|-----------------|-------------------|---|
| 369 | SS_158 | chicken | caecal sample | UK | 2007 | ST 1408 | ST-433 complex  | Yahara et al 2016 | - |
| 370 | SS_167 | chicken | caecal sample | UK | 2009 | ST 21   | ST-21 complex   | Yahara et al 2016 | - |
| 371 | SS_169 | chicken | caecal sample | UK | 2009 | ST 137  | ST-45 complex   | Yahara et al 2016 | - |
| 372 | SS_170 | chicken | caecal sample | UK | 2008 | ST 4452 | -               | Yahara et al 2016 | - |
| 373 | SS_171 | chicken | caecal sample | UK | 2009 | ST 2314 | ST-1034 complex | Yahara et al 2016 | - |
| 374 | SS_172 | chicken | caecal sample | UK | 2009 | ST 353  | ST-353 complex  | Yahara et al 2016 | - |
| 375 | SS_173 | chicken | caecal sample | UK | 2009 | ST 574  | ST-574 complex  | Yahara et al 2016 | - |
| 376 | SS_175 | chicken | caecal sample | UK | 2008 | ST 21   | ST-21 complex   | Yahara et al 2016 | - |
| 378 | SS_177 | chicken | caecal sample | UK | 2008 | ST 137  | ST-45 complex   | Yahara et al 2016 | - |
| 379 | SS_178 | chicken | caecal sample | UK | 2008 | ST 21   | ST-21 complex   | Yahara et al 2016 | - |
| 380 | SS_179 | chicken | caecal sample | UK | 2008 | ST 702  | ST-702 complex  | Yahara et al 2016 | - |
| 381 | SS_180 | chicken | caecal sample | UK | 2009 | ST 449  | -               | Yahara et al 2016 | - |
| 382 | SS_185 | chicken | caecal sample | UK | 2009 | ST 11   | ST-45 complex   | Yahara et al 2016 | - |
| 384 | SS_187 | chicken | caecal sample | UK | 2009 | ST 50   | ST-21 complex   | Yahara et al 2016 | - |
| 385 | SS_188 | chicken | caecal sample | UK | 2009 | ST 2030 | ST-257 complex  | Yahara et al 2016 | - |
| 387 | SS_200 | chicken | caecal sample | UK | 2008 | ST 464  | ST-464 complex  | Yahara et al 2016 | - |

|     |        |         |               |    |      |         |                    |                      |   |
|-----|--------|---------|---------------|----|------|---------|--------------------|----------------------|---|
| 388 | SS_203 | chicken | caecal sample | UK | 2008 | ST 4454 | -                  | Yahara et al<br>2016 | - |
| 389 | SS_206 | chicken | caecal sample | UK | 2008 | ST 4468 | ST-661<br>complex  | Yahara et al<br>2016 | - |
| 390 | SS_212 | chicken | caecal sample | UK | 2009 | ST 1489 | ST-354<br>complex  | Yahara et al<br>2016 | - |
| 392 | SS_218 | chicken | caecal sample | UK | 2009 | ST 45   | ST-45<br>complex   | Yahara et al<br>2016 | - |
| 393 | SS_220 | chicken | caecal sample | UK | 2009 | ST 257  | ST-257<br>complex  | Yahara et al<br>2016 | - |
| 394 | SS_225 | chicken | caecal sample | UK | 2007 | ST 353  | ST-353<br>complex  | Yahara et al<br>2016 | - |
| 395 | SS_226 | chicken | caecal sample | UK | 2009 | ST 51   | ST-443<br>complex  | Yahara et al<br>2016 | - |
| 396 | SS_227 | chicken | caecal sample | UK | 2008 | ST 1489 | ST-354<br>complex  | Yahara et al<br>2016 | - |
| 397 | SS_231 | chicken | caecal sample | UK | 2009 | ST 4432 | ST-661<br>complex  | Yahara et al<br>2016 | - |
| 399 | SS_235 | chicken | caecal sample | UK | 2009 | ST 2314 | ST-1034<br>complex | Yahara et al<br>2016 | - |
| 401 | SS_243 | chicken | caecal sample | UK | 2008 | ST 4472 | ST-702<br>complex  | Yahara et al<br>2016 | - |
| 405 | SS_252 | chicken | caecal sample | UK | 2007 | ST 2197 | ST-45<br>complex   | Yahara et al<br>2016 | - |
| 406 | SS_254 | chicken | caecal sample | UK | 2008 | ST 583  | ST-45<br>complex   | Yahara et al<br>2016 | - |
| 409 | SS_259 | chicken | caecal sample | UK | 2007 | ST 354  | ST-354<br>complex  | Yahara et al<br>2016 | - |
| 411 | SS_262 | chicken | caecal sample | UK | 2008 | ST 574  | ST-574<br>complex  | Yahara et al<br>2016 | - |
| 412 | SS_287 | chicken | caecal sample | UK | 2008 | ST 574  | ST-574<br>complex  | Yahara et al<br>2016 | - |

|     |        |         |                       |    |      |         |                |                   |   |
|-----|--------|---------|-----------------------|----|------|---------|----------------|-------------------|---|
| 414 | SS_289 | chicken | caecal sample         | UK | 2008 | ST 51   | ST-443 complex | Yahara et al 2016 | - |
| 416 | SS_295 | chicken | caecal sample         | UK | 2008 | ST 45   | ST-45 complex  | Yahara et al 2016 | - |
| 417 | SS_296 | chicken | caecal sample         | UK | 2007 | ST 2030 | ST-257 complex | Yahara et al 2016 | - |
| 418 | SS_297 | chicken | caecal sample         | UK | 2007 | ST 50   | ST-21 complex  | Yahara et al 2016 | - |
| 421 | SS_301 | chicken | caecal sample         | UK | 2008 | ST 19   | ST-21 complex  | Yahara et al 2016 | - |
| 422 | SS_302 | chicken | caecal sample         | UK | 2008 | ST 775  | ST-52 complex  | Yahara et al 2016 | - |
| 423 | SS_303 | chicken | caecal sample         | UK | 2007 | ST 19   | ST-21 complex  | Yahara et al 2016 | - |
| 424 | SS_304 | chicken | caecal sample         | UK | 2008 | ST 257  | ST-257 complex | Yahara et al 2016 | - |
| 427 | SS_310 | chicken | caecal sample         | UK | 2007 | ST 574  | ST-574 complex | Yahara et al 2016 | - |
| 428 | SS_312 | chicken | caecal sample         | UK | 2008 | ST 257  | ST-257 complex | Yahara et al 2016 | - |
| 429 | SS_314 | chicken | caecal sample         | UK | 2008 | ST 2197 | ST-45 complex  | Yahara et al 2016 | - |
| 430 | SS_317 | chicken | caecal sample         | UK | 2008 | ST 2568 | ST-661 complex | Yahara et al 2016 | - |
| 433 | SS_005 | chicken | chicken               | UK | 2010 | ST 2030 | ST-257 complex | Yahara et al 2016 | - |
| 434 | SS_006 | chicken | chicken               | UK | 2011 | ST 45   | ST-45 complex  | Yahara et al 2016 | - |
| 435 | SS_025 | chicken | chicken offal or meat | UK | 2005 | ST 257  | ST-257 complex | Yahara et al 2016 | - |
| 437 | SS_027 | chicken | chicken offal or meat | UK | 2005 | ST 257  | ST-257 complex | Yahara et al 2016 | - |

|     |        |         |                          |    |      |        |                   |                      |   |
|-----|--------|---------|--------------------------|----|------|--------|-------------------|----------------------|---|
| 438 | SS_030 | chicken | chicken offal<br>or meat | UK | 2005 | ST 48  | ST-48<br>complex  | Yahara et al<br>2016 | - |
| 440 | SS_032 | chicken | chicken offal<br>or meat | UK | 2005 | ST 137 | ST-45<br>complex  | Yahara et al<br>2016 | - |
| 441 | SS_033 | chicken | chicken offal<br>or meat | UK | 2005 | ST 257 | ST-257<br>complex | Yahara et al<br>2016 | - |
| 443 | SS_036 | chicken | chicken offal<br>or meat | UK | 2005 | ST 25  | ST-45<br>complex  | Yahara et al<br>2016 | - |
| 444 | SS_037 | chicken | chicken offal<br>or meat | UK | 2005 | ST 257 | ST-257<br>complex | Yahara et al<br>2016 | - |
| 445 | SS_038 | chicken | chicken offal<br>or meat | UK | 2005 | ST 257 | ST-257<br>complex | Yahara et al<br>2016 | - |
| 446 | SS_039 | chicken | chicken offal<br>or meat | UK | 2005 | ST 233 | ST-45<br>complex  | Yahara et al<br>2016 | - |
| 447 | SS_040 | chicken | chicken offal<br>or meat | UK | 2005 | ST 45  | ST-45<br>complex  | Yahara et al<br>2016 | - |
| 448 | SS_041 | chicken | chicken offal<br>or meat | UK | 2005 | ST 661 | ST-661<br>complex | Yahara et al<br>2016 | - |
| 449 | SS_042 | chicken | chicken offal<br>or meat | UK | 2005 | ST 25  | ST-45<br>complex  | Yahara et al<br>2016 | - |
| 451 | SS_044 | chicken | chicken offal<br>or meat | UK | 2005 | ST 267 | ST-283<br>complex | Yahara et al<br>2016 | - |
| 452 | SS_045 | chicken | chicken offal<br>or meat | UK | 2005 | ST 257 | ST-257<br>complex | Yahara et al<br>2016 | - |
| 453 | SS_046 | chicken | chicken offal<br>or meat | UK | 2005 | ST 137 | ST-45<br>complex  | Yahara et al<br>2016 | - |
| 458 | SS_053 | chicken | chicken offal<br>or meat | UK | 2005 | ST 25  | ST-45<br>complex  | Yahara et al<br>2016 | - |
| 460 | SS_055 | chicken | chicken offal<br>or meat | UK | 2005 | ST 257 | ST-257<br>complex | Yahara et al<br>2016 | - |
| 461 | SS_056 | chicken | chicken offal<br>or meat | UK | 2005 | ST 607 | ST-607<br>complex | Yahara et al<br>2016 | - |

|     |        |         |                          |    |      |         |                    |                      |   |
|-----|--------|---------|--------------------------|----|------|---------|--------------------|----------------------|---|
| 462 | SS_057 | chicken | chicken offal<br>or meat | UK | 2005 | ST 48   | ST-48<br>complex   | Yahara et al<br>2016 | - |
| 463 | SS_058 | chicken | chicken offal<br>or meat | UK | 2005 | ST 45   | ST-45<br>complex   | Yahara et al<br>2016 | - |
| 466 | SS_278 | chicken | chicken offal<br>or meat | UK | 2005 | ST 50   | ST-21<br>complex   | Yahara et al<br>2016 | - |
| 467 | SS_280 | chicken | chicken offal<br>or meat | UK | 2005 | ST 45   | ST-45<br>complex   | Yahara et al<br>2016 | - |
| 469 | SS_282 | chicken | chicken offal<br>or meat | UK | 2005 | ST 574  | ST-574<br>complex  | Yahara et al<br>2016 | - |
| 470 | SS_283 | chicken | chicken offal<br>or meat | UK | 2005 | ST 354  | ST-354<br>complex  | Yahara et al<br>2016 | - |
| 471 | SS_072 | chicken | farm<br>environment      | UK | 2008 | ST 2314 | ST-1034<br>complex | Yahara et al<br>2016 | - |
| 472 | SS_075 | chicken | farm<br>environment      | UK | 2008 | ST 45   | ST-45<br>complex   | Yahara et al<br>2016 | - |
| 474 | SS_078 | chicken | farm<br>environment      | UK | 2008 | ST 3965 | ST-573<br>complex  | Yahara et al<br>2016 | - |
| 475 | SS_083 | chicken | farm<br>environment      | UK | 2008 | ST 573  | ST-573<br>complex  | Yahara et al<br>2016 | - |
| 476 | SS_085 | chicken | farm<br>environment      | UK | 2008 | ST 354  | ST-354<br>complex  | Yahara et al<br>2016 | - |
| 477 | SS_088 | chicken | farm<br>environment      | UK | 2008 | ST 354  | ST-354<br>complex  | Yahara et al<br>2016 | - |
| 478 | SS_089 | chicken | farm<br>environment      | UK | 2008 | ST 2314 | ST-1034<br>complex | Yahara et al<br>2016 | - |
| 479 | SS_094 | chicken | farm<br>environment      | UK | 2008 | ST 3895 | ST-353<br>complex  | Yahara et al<br>2016 | - |
| 480 | SS_095 | chicken | farm<br>environment      | UK | 2008 | -       | -                  | Yahara et al<br>2016 | - |
| 483 | SS_098 | chicken | farm<br>environment      | UK | 2008 | ST 48   | ST-48<br>complex   | Yahara et al<br>2016 | - |



|      |        |         |                     |    |      |         |                    |                      |   |
|------|--------|---------|---------------------|----|------|---------|--------------------|----------------------|---|
| 484  | SS_099 | chicken | farm<br>environment | UK | 2008 | ST 51   | ST-443<br>complex  | Yahara et al<br>2016 | - |
| 486  | SS_102 | chicken | farm<br>environment | UK | 2008 | ST 2568 | ST-661<br>complex  | Yahara et al<br>2016 | - |
| 488  | SS_104 | chicken | farm<br>environment | UK | 2008 | ST 2314 | ST-1034<br>complex | Yahara et al<br>2016 | - |
| 489  | SS_108 | chicken | farm<br>environment | UK | 2008 | ST 50   | ST-21<br>complex   | Yahara et al<br>2016 | - |
| 490  | SS_109 | chicken | farm<br>environment | UK | 2008 | ST 50   | ST-21<br>complex   | Yahara et al<br>2016 | - |
| 491  | SS_111 | chicken | farm<br>environment | UK | 2008 | ST 2568 | ST-661<br>complex  | Yahara et al<br>2016 | - |
| 492  | SS_112 | chicken | farm<br>environment | UK | 2008 | ST 1910 | ST-353<br>complex  | Yahara et al<br>2016 | - |
| 494  | SS_117 | chicken | farm<br>environment | UK | 2008 | ST 574  | ST-574<br>complex  | Yahara et al<br>2016 | - |
| 495  | SS_120 | chicken | farm<br>environment | UK | 2008 | ST 3573 | -                  | Yahara et al<br>2016 | - |
| 496  | SS_126 | chicken | farm<br>environment | UK | 2008 | ST 449  | -                  | Yahara et al<br>2016 | - |
| 497  | SS_129 | chicken | farm<br>environment | UK | 2008 | ST 354  | ST-354<br>complex  | Yahara et al<br>2016 | - |
| 498  | SS_130 | chicken | farm<br>environment | UK | 2008 | ST 3895 | ST-353<br>complex  | Yahara et al<br>2016 | - |
| 499  | SS_134 | chicken | farm<br>environment | UK | 2008 | ST 3573 | -                  | Yahara et al<br>2016 | - |
| 500  | SS_135 | chicken | farm<br>environment | UK | 2008 | ST 3965 | ST-573<br>complex  | Yahara et al<br>2016 | - |
| 1699 | SS_136 | chicken | farm<br>environment | UK | 2008 | ST 354  | ST-354<br>complex  | Yahara et al<br>2016 | - |
| 1700 | SS_137 | chicken | farm<br>environment | UK | 2008 | ST 2314 | ST-1034<br>complex | Yahara et al<br>2016 | - |

|      |        |         |                  |    |      |         |                 |                   |   |
|------|--------|---------|------------------|----|------|---------|-----------------|-------------------|---|
| 1701 | SS_138 | chicken | farm environment | UK | 2008 | ST 3573 | -               | Yahara et al 2016 | - |
| 1702 | SS_140 | chicken | farm environment | UK | 2008 | ST 45   | ST-45 complex   | Yahara et al 2016 | - |
| 1704 | SS_144 | chicken | farm environment | UK | 2008 | ST 3573 | -               | Yahara et al 2016 | - |
| 1705 | SS_148 | chicken | farm environment | UK | 2008 | ST 257  | ST-257 complex  | Yahara et al 2016 | - |
| 1706 | SS_155 | chicken | farm environment | UK | 2008 | ST 3573 | -               | Yahara et al 2016 | - |
| 1707 | SS_156 | chicken | farm environment | UK | 2008 | ST 50   | ST-21 complex   | Yahara et al 2016 | - |
| 1709 | SS_162 | chicken | farm environment | UK | 2008 | ST 2314 | ST-1034 complex | Yahara et al 2016 | - |
| 1710 | SS_163 | chicken | farm environment | UK | 2008 | ST 2568 | ST-661 complex  | Yahara et al 2016 | - |
| 1711 | SS_164 | chicken | farm environment | UK | 2008 | ST 3573 | -               | Yahara et al 2016 | - |
| 1712 | SS_165 | chicken | farm environment | UK | 2008 | ST 1910 | ST-353 complex  | Yahara et al 2016 | - |
| 1713 | SS_166 | chicken | farm environment | UK | 2008 | ST 3895 | ST-353 complex  | Yahara et al 2016 | - |
| 1714 | SS_181 | chicken | farm environment | UK | 2008 | ST 50   | ST-21 complex   | Yahara et al 2016 | - |
| 1715 | SS_182 | chicken | farm environment | UK | 2008 | ST 2568 | ST-661 complex  | Yahara et al 2016 | - |
| 1717 | SS_184 | chicken | farm environment | UK | 2008 | ST 3573 | -               | Yahara et al 2016 | - |
| 1718 | SS_190 | chicken | farm environment | UK | 2008 | ST 775  | ST-52 complex   | Yahara et al 2016 | - |
| 1719 | SS_191 | chicken | farm environment | UK | 2008 | ST 50   | ST-21 complex   | Yahara et al 2016 | - |

|      |        |         |                     |    |      |         |                    |                      |   |
|------|--------|---------|---------------------|----|------|---------|--------------------|----------------------|---|
| 1720 | SS_195 | chicken | farm<br>environment | UK | 2008 | ST 573  | ST-573<br>complex  | Yahara et al<br>2016 | - |
| 1721 | SS_196 | chicken | farm<br>environment | UK | 2008 | ST 573  | ST-573<br>complex  | Yahara et al<br>2016 | - |
| 1722 | SS_197 | chicken | farm<br>environment | UK | 2008 | ST 2197 | ST-45<br>complex   | Yahara et al<br>2016 | - |
| 1723 | SS_198 | chicken | farm<br>environment | UK | 2008 | ST 2197 | ST-45<br>complex   | Yahara et al<br>2016 | - |
| 1724 | SS_201 | chicken | farm<br>environment | UK | 2008 | ST 2568 | ST-661<br>complex  | Yahara et al<br>2016 | - |
| 1726 | SS_207 | chicken | farm<br>environment | UK | 2008 | ST 607  | ST-607<br>complex  | Yahara et al<br>2016 | - |
| 1727 | SS_209 | chicken | farm<br>environment | UK | 2008 | ST 45   | ST-45<br>complex   | Yahara et al<br>2016 | - |
| 1728 | SS_215 | chicken | farm<br>environment | UK | 2008 | ST 3573 | -                  | Yahara et al<br>2016 | - |
| 1729 | SS_217 | chicken | farm<br>environment | UK | 2008 | ST 2314 | ST-1034<br>complex | Yahara et al<br>2016 | - |
| 1730 | SS_221 | chicken | farm<br>environment | UK | 2008 | ST 2568 | ST-661<br>complex  | Yahara et al<br>2016 | - |
| 1731 | SS_222 | chicken | farm<br>environment | UK | 2008 | ST 50   | ST-21<br>complex   | Yahara et al<br>2016 | - |
| 1732 | SS_228 | chicken | farm<br>environment | UK | 2008 | ST 2568 | ST-661<br>complex  | Yahara et al<br>2016 | - |
| 1733 | SS_230 | chicken | farm<br>environment | UK | 2008 | ST 45   | ST-45<br>complex   | Yahara et al<br>2016 | - |
| 1734 | SS_232 | chicken | farm<br>environment | UK | 2008 | ST 1910 | ST-353<br>complex  | Yahara et al<br>2016 | - |
| 1735 | SS_233 | chicken | farm<br>environment | UK | 2008 | -       | -                  | Yahara et al<br>2016 | - |
| 1737 | SS_237 | chicken | farm<br>environment | UK | 2008 | ST 45   | ST-45<br>complex   | Yahara et al<br>2016 | - |

|      |        |          |                   |    |      |         |                 |                   |   |
|------|--------|----------|-------------------|----|------|---------|-----------------|-------------------|---|
| 1738 | SS_238 | chicken  | farm environment  | UK | 2008 | ST 2197 | ST-45 complex   | Yahara et al 2016 | - |
| 1739 | SS_239 | chicken  | farm environment  | UK | 2008 | ST 2314 | ST-1034 complex | Yahara et al 2016 | - |
| 1740 | SS_244 | chicken  | farm environment  | UK | 2008 | ST 11   | ST-45 complex   | Yahara et al 2016 | - |
| 1742 | SS_003 | human    | human unspecified | UK | 2006 | ST 475  | ST-48 complex   | Yahara et al 2016 | - |
| 1744 | SS_264 | human    | human unspecified | UK | 2011 | ST 607  | ST-607 complex  | Yahara et al 2016 | - |
| 1751 | SS_271 | human    | human unspecified | UK | 2011 | ST 583  | ST-45 complex   | Yahara et al 2016 | - |
| 1752 | SS_272 | human    | human unspecified | UK | 2011 | ST 354  | ST-354 complex  | Yahara et al 2016 | - |
| 1754 | SS_274 | human    | human unspecified | UK | 2011 | ST 574  | ST-574 complex  | Yahara et al 2016 | - |
| 1756 | SS_004 | ruminant | sheep             | UK | 2010 | ST 206  | ST-206 complex  | Yahara et al 2016 | - |
| 1762 | SS_008 | chicken  | chicken           | UK | 2006 | ST 51   | ST-443 complex  | Yahara et al 2016 | - |
| 1763 | SS_009 | ruminant | cattle            | UK | 2006 | ST 42   | ST-42 complex   | Yahara et al 2016 | - |
| 1768 | SS_015 | ruminant | cattle            | UK | 2006 | ST 61   | ST-61 complex   | Yahara et al 2016 | - |
| 1771 | SS_020 | chicken  | chicken           | UK | 2006 | ST 45   | ST-45 complex   | Yahara et al 2016 | - |
| 1774 | SS_024 | chicken  | carcass swab      | UK | 2005 | ST 354  | ST-354 complex  | Yahara et al 2016 | - |
| 1775 | SS_028 | chicken  | carcass swab      | UK | 2005 | ST 583  | ST-45 complex   | Yahara et al 2016 | - |
| 1776 | SS_029 | chicken  | carcass swab      | UK | 2005 | ST 45   | ST-45 complex   | Yahara et al 2016 | - |

|      |        |          |              |    |      |         |                |                   |   |
|------|--------|----------|--------------|----|------|---------|----------------|-------------------|---|
| 1780 | SS_324 | ruminant | sheep        | UK | 2006 | ST 206  | ST-206 complex | Yahara et al 2016 | - |
| 1782 | SS_327 | ruminant | cattle       | UK | 2006 | ST 48   | ST-48 complex  | Yahara et al 2016 | - |
| 1785 | SS_330 | ruminant | sheep        | UK | 2006 | ST 21   | ST-21 complex  | Yahara et al 2016 | - |
| 1786 | SS_332 | ruminant | sheep        | UK | 2006 | ST 53   | ST-21 complex  | Yahara et al 2016 | - |
| 1787 | SS_333 | ruminant | sheep        | UK | 2006 | ST 19   | ST-21 complex  | Yahara et al 2016 | - |
| 1791 | SS_337 | chicken  | chicken      | UK | 2009 | ST 5    | ST-353 complex | Yahara et al 2016 | - |
| 1793 | SS_339 | chicken  | chicken      | UK | 2011 | ST 354  | ST-354 complex | Yahara et al 2016 | - |
| 1794 | SS_340 | chicken  | chicken      | UK | 2011 | ST 257  | ST-257 complex | Yahara et al 2016 | - |
| 1795 | SS_341 | chicken  | chicken      | UK | 2011 | ST 574  | ST-574 complex | Yahara et al 2016 | - |
| 1796 | SS_342 | ruminant | cattle       | UK | 2010 | -       | -              | Yahara et al 2016 | - |
| 1799 | SS_345 | chicken  | carcass swab | UK | 2005 | ST 51   | ST-443 complex | Yahara et al 2016 | - |
| 1800 | SS_375 | chicken  | chicken      | UK | 2007 | ST 45   | ST-45 complex  | Yahara et al 2016 | - |
| 1801 | SS_376 | chicken  | chicken      | UK | 2007 | -       | -              | Yahara et al 2016 | - |
| 1802 | SS_377 | chicken  | chicken      | UK | 2007 | ST 2135 | ST-21 complex  | Yahara et al 2016 | - |
| 1803 | SS_378 | chicken  | chicken      | UK | 2007 | ST 2568 | ST-661 complex | Yahara et al 2016 | - |
| 1804 | SS_379 | chicken  | chicken      | UK | 2007 | ST 52   | ST-52 complex  | Yahara et al 2016 | - |

|      |        |         |              |    |      |         |                 |                   |   |
|------|--------|---------|--------------|----|------|---------|-----------------|-------------------|---|
| 1805 | SS_380 | chicken | chicken      | UK | 2007 | ST 863  | ST-607 complex  | Yahara et al 2016 | - |
| 1806 | SS_381 | chicken | chicken      | UK | 2007 | ST 48   | ST-48 complex   | Yahara et al 2016 | - |
| 1807 | SS_382 | chicken | chicken      | UK | 2007 | ST 4415 | -               | Yahara et al 2016 | - |
| 1808 | SS_383 | chicken | chicken      | UK | 2007 | ST 267  | ST-283 complex  | Yahara et al 2016 | - |
| 1810 | SS_385 | chicken | chicken      | UK | 2007 | ST 573  | ST-573 complex  | Yahara et al 2016 | - |
| 1811 | SS_386 | chicken | chicken      | UK | 2007 | ST 51   | ST-443 complex  | Yahara et al 2016 | - |
| 1812 | SS_387 | chicken | chicken      | UK | 2007 | ST 257  | ST-257 complex  | Yahara et al 2016 | - |
| 1814 | SS_389 | chicken | chicken      | UK | 2007 | ST 702  | ST-702 complex  | Yahara et al 2016 | - |
| 1817 | SS_392 | chicken | chicken      | UK | 2007 | ST 583  | ST-45 complex   | Yahara et al 2016 | - |
| 1818 | SS_393 | chicken | chicken      | UK | 2007 | ST 607  | ST-607 complex  | Yahara et al 2016 | - |
| 1819 | SS_394 | chicken | chicken      | UK | 2007 | ST 1491 | -               | Yahara et al 2016 | - |
| 1822 | SS_397 | chicken | chicken      | UK | 2007 | ST 21   | ST-21 complex   | Yahara et al 2016 | - |
| 1829 | SS_404 | chicken | chicken      | UK | 2008 | ST 257  | ST-257 complex  | Yahara et al 2016 | - |
| 1830 | SS_405 | chicken | carcass swab | UK | 2008 | ST 573  | ST-573 complex  | Yahara et al 2016 | - |
| 1831 | SS_406 | chicken | carcass swab | UK | 2008 | ST 257  | ST-257 complex  | Yahara et al 2016 | - |
| 1832 | SS_407 | chicken | chicken      | UK | 2008 | ST 1709 | ST-1034 complex | Yahara et al 2016 | - |

|      |         |         |                   |    |      |         |                |                   |   |
|------|---------|---------|-------------------|----|------|---------|----------------|-------------------|---|
| 1833 | SS_408  | chicken | farm environment  | UK | 2008 | ST 464  | ST-464 complex | Yahara et al 2016 | - |
| 1834 | SS_410  | chicken | carcass swab      | UK | 2008 | ST 4460 | ST-661 complex | Yahara et al 2016 | - |
| 1835 | SS_411  | chicken | carcass swab      | UK | -    | ST 137  | ST-45 complex  | Yahara et al 2016 | - |
| 1836 | SS_558  | human   | human unspecified | UK | -    | ST 19   | ST-21 complex  | Yahara et al 2016 | - |
| 1837 | SS_560  | human   | human unspecified | UK | -    | ST 45   | ST-45 complex  | Yahara et al 2016 | - |
| 1838 | SS_563  | human   | human unspecified | UK | -    | ST 51   | ST-443 complex | Yahara et al 2016 | - |
| 1839 | SS_565  | human   | human unspecified | UK | -    | ST 257  | ST-257 complex | Yahara et al 2016 | - |
| 1840 | SS_566  | human   | human unspecified | UK | -    | ST 257  | ST-257 complex | Yahara et al 2016 | - |
| 1850 | SS_588  | human   | human unspecified | UK | -    | ST 2197 | ST-45 complex  | Yahara et al 2016 | - |
| 1851 | SS_592  | human   | human unspecified | UK | 2012 | ST 50   | ST-21 complex  | Yahara et al 2016 | - |
| 1853 | SS_601  | human   | human unspecified | UK | 2012 | ST 353  | ST-353 complex | Yahara et al 2016 | - |
| 1854 | SS_603  | human   | human unspecified | UK | 2012 | ST 51   | ST-443 complex | Yahara et al 2016 | - |
| 1856 | SS_620  | human   | human unspecified | UK | 2012 | ST 53   | ST-21 complex  | Yahara et al 2016 | - |
| 1857 | OXC5325 | human   | human stool       | UK | 2010 | ST 51   | ST-443 complex | Yahara et al 2016 | - |
| 1858 | OXC5326 | human   | human stool       | UK | 2010 | ST 607  | ST-607 complex | Yahara et al 2016 | - |
| 1860 | OXC5330 | human   | human stool       | UK | 2010 | ST 1003 | ST-45 complex  | Yahara et al 2016 | - |

|      |         |       |             |    |      |         |                |                   |   |
|------|---------|-------|-------------|----|------|---------|----------------|-------------------|---|
| 1861 | OXC5331 | human | human stool | UK | 2010 | ST 137  | ST-45 complex  | Yahara et al 2016 | - |
| 1862 | OXC5332 | human | human stool | UK | 2010 | ST 45   | ST-45 complex  | Yahara et al 2016 | - |
| 1863 | OXC5333 | human | human stool | UK | 2010 | ST 50   | ST-21 complex  | Yahara et al 2016 | - |
| 1864 | OXC5334 | human | human stool | UK | 2010 | ST 48   | ST-48 complex  | Yahara et al 2016 | - |
| 1865 | OXC5335 | human | human stool | UK | 2010 | ST 50   | ST-21 complex  | Yahara et al 2016 | - |
| 1871 | OXC5343 | human | human stool | UK | 2010 | ST 2109 | ST-45 complex  | Yahara et al 2016 | - |
| 1872 | OXC5344 | human | human stool | UK | 2010 | ST 21   | ST-21 complex  | Yahara et al 2016 | - |
| 1875 | OXC5349 | human | human stool | UK | 2010 | ST 50   | ST-21 complex  | Yahara et al 2016 | - |
| 1876 | OXC5350 | human | human stool | UK | 2010 | ST 21   | ST-21 complex  | Yahara et al 2016 | - |
| 1878 | OXC5355 | human | human stool | UK | 2010 | ST 1232 | ST-353 complex | Yahara et al 2016 | - |
| 1879 | OXC5358 | human | human stool | UK | 2010 | ST 48   | ST-48 complex  | Yahara et al 2016 | - |
| 1881 | OXC5364 | human | human stool | UK | 2010 | ST 21   | ST-21 complex  | Yahara et al 2016 | - |
| 1885 | OXC5372 | human | human stool | UK | 2010 | ST 19   | ST-21 complex  | Yahara et al 2016 | - |
| 1888 | OXC5376 | human | human stool | UK | 2010 | ST 257  | ST-257 complex | Yahara et al 2016 | - |
| 1890 | OXC5378 | human | human stool | UK | 2010 | ST 53   | ST-21 complex  | Yahara et al 2016 | - |
| 1891 | OXC5380 | human | human stool | UK | 2010 | ST 2140 | ST-574 complex | Yahara et al 2016 | - |



|      |         |       |             |    |      |         |                |                   |   |
|------|---------|-------|-------------|----|------|---------|----------------|-------------------|---|
| 1894 | OXC5385 | human | human stool | UK | 2010 | ST 354  | ST-354 complex | Yahara et al 2016 | - |
| 1896 | OXC5390 | human | human stool | UK | 2010 | ST 257  | ST-257 complex | Yahara et al 2016 | - |
| 1899 | OXC5393 | human | human stool | UK | 2010 | ST 50   | ST-21 complex  | Yahara et al 2016 | - |
| 1900 | OXC5394 | human | human stool | UK | 2010 | ST 574  | ST-574 complex | Yahara et al 2016 | - |
| 1901 | OXC5395 | human | human stool | UK | 2010 | ST 257  | ST-257 complex | Yahara et al 2016 | - |
| 1903 | OXC5397 | human | human stool | UK | 2010 | ST 5242 | ST-21 complex  | Yahara et al 2016 | - |
| 1904 | OXC5474 | human | human stool | UK | 2010 | ST 21   | ST-21 complex  | Yahara et al 2016 | - |
| 1905 | OXC5475 | human | human stool | UK | 2010 | ST 354  | ST-354 complex | Yahara et al 2016 | - |
| 1906 | OXC5476 | human | human stool | UK | 2010 | ST 19   | ST-21 complex  | Yahara et al 2016 | - |
| 1907 | OXC5477 | human | human stool | UK | 2010 | ST 48   | ST-48 complex  | Yahara et al 2016 | - |
| 1909 | OXC5480 | human | human stool | UK | 2010 | ST 2122 | ST-353 complex | Yahara et al 2016 | - |
| 1910 | OXC5627 | human | human stool | UK | 2010 | ST 2033 | ST-354 complex | Yahara et al 2016 | - |
| 1912 | OXC5664 | human | human stool | UK | 2010 | ST 50   | ST-21 complex  | Yahara et al 2016 | - |
| 1916 | OXC5671 | human | human stool | UK | 2010 | ST 883  | ST-21 complex  | Yahara et al 2016 | - |
| 1918 | OXC5673 | human | human stool | UK | 2010 | ST 354  | ST-354 complex | Yahara et al 2016 | - |
| 1919 | OXC5674 | human | human stool | UK | 2010 | ST 52   | ST-52 complex  | Yahara et al 2016 | - |

|      |         |       |             |    |      |        |                |                   |   |
|------|---------|-------|-------------|----|------|--------|----------------|-------------------|---|
| 1920 | OXC5675 | human | human stool | UK | 2010 | ST 48  | ST-48 complex  | Yahara et al 2016 | - |
| 1921 | OXC5676 | human | human stool | UK | 2010 | ST 51  | ST-443 complex | Yahara et al 2016 | - |
| 1923 | OXC5679 | human | human stool | UK | 2010 | ST 5   | ST-353 complex | Yahara et al 2016 | - |
| 1924 | OXC5680 | human | human stool | UK | 2010 | ST 5   | ST-353 complex | Yahara et al 2016 | - |
| 1928 | OXC5686 | human | human stool | UK | 2010 | ST 400 | ST-353 complex | Yahara et al 2016 | - |
| 1931 | OXC5690 | human | human stool | UK | 2010 | ST 5   | ST-353 complex | Yahara et al 2016 | - |
| 1932 | OXC5691 | human | human stool | UK | 2010 | ST 50  | ST-21 complex  | Yahara et al 2016 | - |
| 1933 | OXC5694 | human | human stool | UK | 2010 | ST 48  | ST-48 complex  | Yahara et al 2016 | - |
| 1934 | OXC5695 | human | human stool | UK | 2010 | ST 354 | ST-354 complex | Yahara et al 2016 | - |
| 1935 | OXC5696 | human | human stool | UK | 2010 | ST 53  | ST-21 complex  | Yahara et al 2016 | - |
| 1937 | OXC5700 | human | human stool | UK | 2010 | ST 354 | ST-354 complex | Yahara et al 2016 | - |
| 1938 | OXC5701 | human | human stool | UK | 2010 | ST 353 | ST-353 complex | Yahara et al 2016 | - |
| 1939 | OXC5702 | human | human stool | UK | 2010 | ST 51  | ST-443 complex | Yahara et al 2016 | - |
| 1940 | OXC5703 | human | human stool | UK | 2010 | ST 257 | ST-257 complex | Yahara et al 2016 | - |
| 1942 | OXC5707 | human | human stool | UK | 2010 | ST 48  | ST-48 complex  | Yahara et al 2016 | - |
| 1943 | OXC5708 | human | human stool | UK | 2010 | ST 861 | ST-21 complex  | Yahara et al 2016 | - |

|      |         |       |             |    |      |         |                |                   |   |
|------|---------|-------|-------------|----|------|---------|----------------|-------------------|---|
| 1944 | OXC5709 | human | human stool | UK | 2010 | ST 2030 | ST-257 complex | Yahara et al 2016 | - |
| 1945 | OXC5710 | human | human stool | UK | 2010 | ST 21   | ST-21 complex  | Yahara et al 2016 | - |
| 1946 | OXC5711 | human | human stool | UK | 2010 | ST 48   | ST-48 complex  | Yahara et al 2016 | - |
| 1947 | OXC5712 | human | human stool | UK | 2010 | ST 48   | ST-48 complex  | Yahara et al 2016 | - |
| 1948 | OXC5713 | human | human stool | UK | 2010 | ST 21   | ST-21 complex  | Yahara et al 2016 | - |
| 1950 | OXC5716 | human | human stool | UK | 2010 | ST 38   | ST-48 complex  | Yahara et al 2016 | - |
| 1951 | OXC5720 | human | human stool | UK | 2010 | ST 50   | ST-21 complex  | Yahara et al 2016 | - |
| 1953 | OXC5484 | human | human stool | UK | 2010 | ST 48   | ST-48 complex  | Yahara et al 2016 | - |
| 1957 | OXC5495 | human | human stool | UK | 2010 | ST 21   | ST-21 complex  | Yahara et al 2016 | - |
| 1958 | OXC5497 | human | human stool | UK | 2010 | ST 257  | ST-257 complex | Yahara et al 2016 | - |
| 1959 | OXC5499 | human | human stool | UK | 2010 | ST 5    | ST-353 complex | Yahara et al 2016 | - |
| 1960 | OXC5604 | human | human stool | UK | 2010 | ST 2033 | ST-354 complex | Yahara et al 2016 | - |
| 1962 | OXC5608 | human | human stool | UK | 2010 | ST 52   | ST-52 complex  | Yahara et al 2016 | - |
| 1964 | OXC5614 | human | human stool | UK | 2010 | ST 475  | ST-48 complex  | Yahara et al 2016 | - |
| 1965 | OXC5616 | human | human stool | UK | 2010 | ST 574  | ST-574 complex | Yahara et al 2016 | - |
| 1966 | OXC5617 | human | human stool | UK | 2010 | ST 53   | ST-21 complex  | Yahara et al 2016 | - |

|      |         |       |             |    |      |         |                |                   |   |
|------|---------|-------|-------------|----|------|---------|----------------|-------------------|---|
| 1967 | OXC5618 | human | human stool | UK | 2010 | ST 21   | ST-21 complex  | Yahara et al 2016 | - |
| 1968 | OXC5620 | human | human stool | UK | 2010 | ST 51   | ST-443 complex | Yahara et al 2016 | - |
| 1971 | OXC5625 | human | human stool | UK | 2010 | ST 21   | ST-21 complex  | Yahara et al 2016 | - |
| 1972 | OXC5626 | human | human stool | UK | 2010 | ST 475  | ST-48 complex  | Yahara et al 2016 | - |
| 1973 | OXC5628 | human | human stool | UK | 2010 | ST 50   | ST-21 complex  | Yahara et al 2016 | - |
| 1977 | OXC5632 | human | human stool | UK | 2010 | ST 257  | ST-257 complex | Yahara et al 2016 | - |
| 1978 | OXC5633 | human | human stool | UK | 2010 | ST 2076 | ST-353 complex | Yahara et al 2016 | - |
| 1979 | OXC5634 | human | human stool | UK | 2010 | ST 5    | ST-353 complex | Yahara et al 2016 | - |
| 1981 | OXC5636 | human | human stool | UK | 2010 | ST 48   | ST-48 complex  | Yahara et al 2016 | - |
| 1982 | OXC5638 | human | human stool | UK | 2010 | ST 581  | ST-353 complex | Yahara et al 2016 | - |
| 1983 | OXC5639 | human | human stool | UK | 2010 | ST 883  | ST-21 complex  | Yahara et al 2016 | - |
| 1984 | OXC5640 | human | human stool | UK | 2010 | ST 48   | ST-48 complex  | Yahara et al 2016 | - |
| 1985 | OXC5641 | human | human stool | UK | 2010 | ST 2030 | ST-257 complex | Yahara et al 2016 | - |
| 1987 | OXC5643 | human | human stool | UK | 2010 | ST 257  | ST-257 complex | Yahara et al 2016 | - |
| 1989 | OXC5646 | human | human stool | UK | 2010 | ST 51   | ST-443 complex | Yahara et al 2016 | - |
| 1990 | OXC5647 | human | human stool | UK | 2010 | ST 19   | ST-21 complex  | Yahara et al 2016 | - |

|      |         |       |             |    |      |         |                |                   |   |
|------|---------|-------|-------------|----|------|---------|----------------|-------------------|---|
| 1992 | OXC5649 | human | human stool | UK | 2010 | ST 21   | ST-21 complex  | Yahara et al 2016 | - |
| 1993 | OXC5651 | human | human stool | UK | 2010 | ST 50   | ST-21 complex  | Yahara et al 2016 | - |
| 1994 | OXC5652 | human | human stool | UK | 2010 | ST 21   | ST-21 complex  | Yahara et al 2016 | - |
| 1995 | OXC5782 | human | human stool | UK | 2010 | ST 574  | ST-574 complex | Yahara et al 2016 | - |
| 1997 | OXC5786 | human | human stool | UK | 2010 | ST 2122 | ST-353 complex | Yahara et al 2016 | - |
| 1998 | OXC5787 | human | human stool | UK | 2010 | ST 574  | ST-574 complex | Yahara et al 2016 | - |
| 2000 | OXC5835 | human | human stool | UK | 2010 | ST 21   | ST-21 complex  | Yahara et al 2016 | - |
| 2001 | OXC5498 | human | human stool | UK | 2010 | ST 21   | ST-21 complex  | Yahara et al 2016 | - |
| 2003 | OXC5838 | human | human stool | UK | 2010 | ST 5173 | ST-48 complex  | Yahara et al 2016 | - |
| 2004 | OXC5839 | human | human stool | UK | 2010 | ST 3510 | ST-353 complex | Yahara et al 2016 | - |
| 2005 | OXC5840 | human | human stool | UK | 2010 | ST 19   | ST-21 complex  | Yahara et al 2016 | - |
| 2006 | OXC5841 | human | human stool | UK | 2010 | ST 2135 | ST-21 complex  | Yahara et al 2016 | - |
| 2008 | OXC5843 | human | human stool | UK | 2011 | ST 861  | ST-21 complex  | Yahara et al 2016 | - |
| 2011 | OXC5846 | human | human stool | UK | 2011 | ST 21   | ST-21 complex  | Yahara et al 2016 | - |
| 2012 | OXC5847 | human | human stool | UK | 2011 | ST 2033 | ST-354 complex | Yahara et al 2016 | - |
| 2013 | OXC5848 | human | human stool | UK | 2011 | ST 21   | ST-21 complex  | Yahara et al 2016 | - |

|      |         |       |             |    |      |         |                |                   |   |
|------|---------|-------|-------------|----|------|---------|----------------|-------------------|---|
| 2015 | OXC5850 | human | human stool | UK | 2011 | ST 45   | ST-45 complex  | Yahara et al 2016 | - |
| 2022 | OXC5857 | human | human stool | UK | 2011 | ST 775  | ST-52 complex  | Yahara et al 2016 | - |
| 2024 | OXC5859 | human | human stool | UK | 2011 | ST 2030 | ST-257 complex | Yahara et al 2016 | - |
| 2026 | OXC5861 | human | human stool | UK | 2011 | ST 48   | ST-48 complex  | Yahara et al 2016 | - |
| 2027 | OXC5862 | human | human stool | UK | 2011 | ST 21   | ST-21 complex  | Yahara et al 2016 | - |
| 2030 | OXC5865 | human | human stool | UK | 2011 | ST 2030 | ST-257 complex | Yahara et al 2016 | - |
| 2031 | OXC5866 | human | human stool | UK | 2011 | ST 257  | ST-257 complex | Yahara et al 2016 | - |
| 2032 | OXC5869 | human | human stool | UK | 2011 | ST 2030 | ST-257 complex | Yahara et al 2016 | - |
| 2034 | OXC5871 | human | human stool | UK | 2011 | ST 19   | ST-21 complex  | Yahara et al 2016 | - |
| 2035 | OXC5872 | human | human stool | UK | 2011 | ST 257  | ST-257 complex | Yahara et al 2016 | - |
| 2037 | OXC5874 | human | human stool | UK | 2011 | ST 48   | ST-48 complex  | Yahara et al 2016 | - |
| 2040 | OXC5877 | human | human stool | UK | 2011 | ST 475  | ST-48 complex  | Yahara et al 2016 | - |
| 2041 | OXC5878 | human | human stool | UK | 2011 | ST 48   | ST-48 complex  | Yahara et al 2016 | - |
| 2042 | OXC5879 | human | human stool | UK | 2011 | ST 50   | ST-21 complex  | Yahara et al 2016 | - |
| 2043 | OXC5880 | human | human stool | UK | 2011 | ST 53   | ST-21 complex  | Yahara et al 2016 | - |
| 2045 | OXC5883 | human | human stool | UK | 2011 | ST 6604 | ST-257 complex | Yahara et al 2016 | - |

|      |         |       |             |    |      |         |                |                   |   |
|------|---------|-------|-------------|----|------|---------|----------------|-------------------|---|
| 2047 | OXC5398 | human | human stool | UK | 2010 | ST 257  | ST-257 complex | Yahara et al 2016 | - |
| 2048 | OXC5400 | human | human stool | UK | 2010 | ST 354  | ST-354 complex | Yahara et al 2016 | - |
| 2050 | OXC5405 | human | human stool | UK | 2010 | ST 48   | ST-48 complex  | Yahara et al 2016 | - |
| 2053 | OXC5410 | human | human stool | UK | 2010 | ST 257  | ST-257 complex | Yahara et al 2016 | - |
| 2055 | OXC5412 | human | human stool | UK | 2010 | ST 5134 | ST-607 complex | Yahara et al 2016 | - |
| 2056 | OXC5413 | human | human stool | UK | 2010 | ST 21   | ST-21 complex  | Yahara et al 2016 | - |
| 2057 | OXC5414 | human | human stool | UK | 2010 | ST 50   | ST-21 complex  | Yahara et al 2016 | - |
| 2058 | OXC5416 | human | human stool | UK | 2010 | ST 3574 | ST-21 complex  | Yahara et al 2016 | - |
| 2060 | OXC5418 | human | human stool | UK | 2010 | ST 990  | ST-257 complex | Yahara et al 2016 | - |
| 2061 | OXC5420 | human | human stool | UK | 2010 | ST 45   | ST-45 complex  | Yahara et al 2016 | - |
| 2062 | OXC5421 | human | human stool | UK | 2010 | ST 257  | ST-257 complex | Yahara et al 2016 | - |
| 2063 | OXC5422 | human | human stool | UK | 2010 | ST 6601 | ST-48 complex  | Yahara et al 2016 | - |
| 2065 | OXC5427 | human | human stool | UK | 2010 | ST 5    | ST-353 complex | Yahara et al 2016 | - |
| 2066 | OXC5428 | human | human stool | UK | 2010 | ST 5    | ST-353 complex | Yahara et al 2016 | - |
| 2067 | OXC5431 | human | human stool | UK | 2010 | ST 5018 | ST-21 complex  | Yahara et al 2016 | - |
| 2068 | OXC5433 | human | human stool | UK | 2010 | ST 48   | ST-48 complex  | Yahara et al 2016 | - |

|      |         |       |             |    |      |        |                |                   |   |
|------|---------|-------|-------------|----|------|--------|----------------|-------------------|---|
| 2069 | OXC5434 | human | human stool | UK | 2010 | ST 137 | ST-45 complex  | Yahara et al 2016 | - |
| 2070 | OXC5435 | human | human stool | UK | 2010 | ST 50  | ST-21 complex  | Yahara et al 2016 | - |
| 2071 | OXC5437 | human | human stool | UK | 2010 | ST 883 | ST-21 complex  | Yahara et al 2016 | - |
| 2072 | OXC5438 | human | human stool | UK | 2010 | ST 53  | ST-21 complex  | Yahara et al 2016 | - |
| 2077 | OXC5444 | human | human stool | UK | 2010 | ST 19  | ST-21 complex  | Yahara et al 2016 | - |
| 2078 | OXC5445 | human | human stool | UK | 2010 | ST 50  | ST-21 complex  | Yahara et al 2016 | - |
| 2079 | OXC5451 | human | human stool | UK | 2010 | ST 50  | ST-21 complex  | Yahara et al 2016 | - |
| 2080 | OXC5452 | human | human stool | UK | 2010 | ST 574 | ST-574 complex | Yahara et al 2016 | - |
| 2083 | OXC5456 | human | human stool | UK | 2010 | ST 48  | ST-48 complex  | Yahara et al 2016 | - |
| 2086 | OXC5460 | human | human stool | UK | 2010 | ST 443 | ST-443 complex | Yahara et al 2016 | - |
| 2087 | OXC5462 | human | human stool | UK | 2010 | ST 50  | ST-21 complex  | Yahara et al 2016 | - |
| 2088 | OXC5463 | human | human stool | UK | 2010 | ST 19  | ST-21 complex  | Yahara et al 2016 | - |
| 2089 | OXC5464 | human | human stool | UK | 2010 | ST 607 | ST-607 complex | Yahara et al 2016 | - |
| 2090 | OXC5465 | human | human stool | UK | 2010 | ST 21  | ST-21 complex  | Yahara et al 2016 | - |
| 2091 | OXC5466 | human | human stool | UK | 2010 | ST 354 | ST-354 complex | Yahara et al 2016 | - |
| 2092 | OXC5470 | human | human stool | UK | 2010 | ST 44  | ST-21 complex  | Yahara et al 2016 | - |



|      |         |       |             |    |      |         |                |                   |   |
|------|---------|-------|-------------|----|------|---------|----------------|-------------------|---|
| 2093 | OXC5472 | human | human stool | UK | 2010 | ST 5    | ST-353 complex | Yahara et al 2016 | - |
| 2095 | OXC5721 | human | human stool | UK | 2010 | ST 5    | ST-353 complex | Yahara et al 2016 | - |
| 2097 | OXC5724 | human | human stool | UK | 2010 | ST 19   | ST-21 complex  | Yahara et al 2016 | - |
| 2098 | OXC5725 | human | human stool | UK | 2010 | ST 50   | ST-21 complex  | Yahara et al 2016 | - |
| 2099 | OXC5726 | human | human stool | UK | 2010 | ST 5    | ST-353 complex | Yahara et al 2016 | - |
| 2101 | OXC5728 | human | human stool | UK | 2010 | ST 2355 | ST-21 complex  | Yahara et al 2016 | - |
| 2102 | OXC5731 | human | human stool | UK | 2010 | ST 50   | ST-21 complex  | Yahara et al 2016 | - |
| 2103 | OXC5732 | human | human stool | UK | 2010 | ST 607  | ST-607 complex | Yahara et al 2016 | - |
| 2106 | OXC5737 | human | human stool | UK | 2010 | ST 266  | ST-21 complex  | Yahara et al 2016 | - |
| 2107 | OXC5739 | human | human stool | UK | 2010 | ST 21   | ST-21 complex  | Yahara et al 2016 | - |
| 2109 | OXC5741 | human | human stool | UK | 2010 | ST 354  | ST-354 complex | Yahara et al 2016 | - |
| 2112 | OXC5744 | human | human stool | UK | 2010 | ST 137  | ST-45 complex  | Yahara et al 2016 | - |
| 2113 | OXC5745 | human | human stool | UK | 2010 | ST 48   | ST-48 complex  | Yahara et al 2016 | - |
| 2114 | OXC5747 | human | human stool | UK | 2010 | ST 775  | ST-52 complex  | Yahara et al 2016 | - |
| 2115 | OXC5748 | human | human stool | UK | 2010 | ST 775  | ST-52 complex  | Yahara et al 2016 | - |
| 2116 | OXC5750 | human | human stool | UK | 2010 | ST 400  | ST-353 complex | Yahara et al 2016 | - |

|      |         |       |             |    |      |         |                |                   |   |
|------|---------|-------|-------------|----|------|---------|----------------|-------------------|---|
| 2117 | OXC5751 | human | human stool | UK | 2010 | ST 775  | ST-52 complex  | Yahara et al 2016 | - |
| 2119 | OXC5754 | human | human stool | UK | 2010 | ST 21   | ST-21 complex  | Yahara et al 2016 | - |
| 2120 | OXC5757 | human | human stool | UK | 2010 | ST 21   | ST-21 complex  | Yahara et al 2016 | - |
| 2121 | OXC5758 | human | human stool | UK | 2010 | ST 51   | ST-443 complex | Yahara et al 2016 | - |
| 2126 | OXC5764 | human | human stool | UK | 2010 | ST 51   | ST-443 complex | Yahara et al 2016 | - |
| 2128 | OXC5766 | human | human stool | UK | 2010 | ST 50   | ST-21 complex  | Yahara et al 2016 | - |
| 2129 | OXC5767 | human | human stool | UK | 2010 | ST 53   | ST-21 complex  | Yahara et al 2016 | - |
| 2132 | OXC5771 | human | human stool | UK | 2010 | ST 50   | ST-21 complex  | Yahara et al 2016 | - |
| 2133 | OXC5772 | human | human stool | UK | 2010 | ST 2135 | ST-21 complex  | Yahara et al 2016 | - |
| 2135 | OXC5774 | human | human stool | UK | 2010 | ST 190  | ST-21 complex  | Yahara et al 2016 | - |
| 2137 | OXC5776 | human | human stool | UK | 2010 | ST 574  | ST-574 complex | Yahara et al 2016 | - |
| 2140 | OXC5779 | human | human stool | UK | 2011 | ST 257  | ST-257 complex | Yahara et al 2016 | - |
| 2141 | OXC5780 | human | human stool | UK | 2011 | ST 5    | ST-353 complex | Yahara et al 2016 | - |
| 2142 | OXC5781 | human | human stool | UK | 2011 | ST 257  | ST-257 complex | Yahara et al 2016 | - |
| 2143 | OXC5788 | human | human stool | UK | 2011 | ST 257  | ST-257 complex | Yahara et al 2016 | - |
| 2144 | OXC5789 | human | human stool | UK | 2011 | ST 904  | ST-607 complex | Yahara et al 2016 | - |

|      |         |       |             |    |      |         |                |                   |   |
|------|---------|-------|-------------|----|------|---------|----------------|-------------------|---|
| 2145 | OXC5791 | human | human stool | UK | 2011 | ST 21   | ST-21 complex  | Yahara et al 2016 | - |
| 2146 | OXC5792 | human | human stool | UK | 2011 | ST 574  | ST-574 complex | Yahara et al 2016 | - |
| 2148 | OXC5794 | human | human stool | UK | 2011 | ST 2030 | ST-257 complex | Yahara et al 2016 | - |
| 2151 | OXC5797 | human | human stool | UK | 2011 | ST 2033 | ST-354 complex | Yahara et al 2016 | - |
| 2153 | OXC5799 | human | human stool | UK | 2011 | ST 50   | ST-21 complex  | Yahara et al 2016 | - |
| 2155 | OXC5801 | human | human stool | UK | 2011 | ST 51   | ST-443 complex | Yahara et al 2016 | - |
| 2156 | OXC5802 | human | human stool | UK | 2011 | ST 1038 | ST-354 complex | Yahara et al 2016 | - |
| 2168 | OXC5804 | human | human stool | UK | 2011 | ST 53   | ST-21 complex  | Yahara et al 2016 | - |
| 2169 | OXC5805 | human | human stool | UK | 2011 | ST 51   | ST-443 complex | Yahara et al 2016 | - |
| 2171 | OXC5808 | human | human stool | UK | 2011 | ST 53   | ST-21 complex  | Yahara et al 2016 | - |
| 2172 | OXC5809 | human | human stool | UK | 2011 | ST 51   | ST-443 complex | Yahara et al 2016 | - |
| 2174 | OXC5811 | human | human stool | UK | 2011 | ST 2135 | ST-21 complex  | Yahara et al 2016 | - |
| 2175 | OXC5812 | human | human stool | UK | 2011 | ST 574  | ST-574 complex | Yahara et al 2016 | - |
| 2176 | OXC5813 | human | human stool | UK | 2011 | ST 5    | ST-353 complex | Yahara et al 2016 | - |
| 2177 | OXC5814 | human | human stool | UK | 2011 | ST 48   | ST-48 complex  | Yahara et al 2016 | - |
| 2178 | OXC5815 | human | human stool | UK | 2011 | ST 574  | ST-574 complex | Yahara et al 2016 | - |

|      |         |       |             |    |      |         |                |                   |   |
|------|---------|-------|-------------|----|------|---------|----------------|-------------------|---|
| 2179 | OXC5816 | human | human stool | UK | 2011 | ST 45   | ST-45 complex  | Yahara et al 2016 | - |
| 2180 | OXC5817 | human | human stool | UK | 2011 | ST 257  | ST-257 complex | Yahara et al 2016 | - |
| 2181 | OXC5818 | human | human stool | UK | 2011 | ST 19   | ST-21 complex  | Yahara et al 2016 | - |
| 2182 | OXC5819 | human | human stool | UK | 2011 | ST 21   | ST-21 complex  | Yahara et al 2016 | - |
| 2183 | OXC5820 | human | human stool | UK | 2011 | ST 990  | ST-257 complex | Yahara et al 2016 | - |
| 2184 | OXC5821 | human | human stool | UK | 2011 | ST 2135 | ST-21 complex  | Yahara et al 2016 | - |
| 2185 | OXC5822 | human | human stool | UK | 2011 | ST 21   | ST-21 complex  | Yahara et al 2016 | - |
| 2186 | OXC5823 | human | human stool | UK | 2011 | ST 53   | ST-21 complex  | Yahara et al 2016 | - |
| 2188 | OXC5825 | human | human stool | UK | 2011 | ST 53   | ST-21 complex  | Yahara et al 2016 | - |
| 2189 | OXC5826 | human | human stool | UK | 2011 | ST 21   | ST-21 complex  | Yahara et al 2016 | - |
| 2192 | OXC5829 | human | human stool | UK | 2011 | ST 50   | ST-21 complex  | Yahara et al 2016 | - |
| 2193 | OXC5830 | human | human stool | UK | 2011 | ST 400  | ST-353 complex | Yahara et al 2016 | - |
| 2195 | OXC5832 | human | human stool | UK | 2011 | ST 21   | ST-21 complex  | Yahara et al 2016 | - |
| 2196 | OXC5833 | human | human stool | UK | 2011 | ST 6603 | ST-257 complex | Yahara et al 2016 | - |
| 2199 | OXC5934 | human | human stool | UK | 2011 | ST 2084 | ST-353 complex | Yahara et al 2016 | - |
| 2200 | OXC5885 | human | human stool | UK | 2011 | ST 257  | ST-257 complex | Yahara et al 2016 | - |

|      |         |       |             |    |      |         |                |                   |   |
|------|---------|-------|-------------|----|------|---------|----------------|-------------------|---|
| 2201 | OXC5886 | human | human stool | UK | 2011 | ST 5    | ST-353 complex | Yahara et al 2016 | - |
| 2202 | OXC5887 | human | human stool | UK | 2011 | ST 19   | ST-21 complex  | Yahara et al 2016 | - |
| 2203 | OXC5888 | human | human stool | UK | 2011 | ST 2135 | ST-21 complex  | Yahara et al 2016 | - |
| 2204 | OXC5889 | human | human stool | UK | 2011 | ST 2030 | ST-257 complex | Yahara et al 2016 | - |
| 2210 | OXC5895 | human | human stool | UK | 2011 | ST 2135 | ST-21 complex  | Yahara et al 2016 | - |
| 2213 | OXC5898 | human | human stool | UK | 2011 | ST 52   | ST-52 complex  | Yahara et al 2016 | - |
| 2214 | OXC5899 | human | human stool | UK | 2011 | ST 19   | ST-21 complex  | Yahara et al 2016 | - |
| 2215 | OXC5900 | human | human stool | UK | 2011 | ST 52   | ST-52 complex  | Yahara et al 2016 | - |
| 2216 | OXC5902 | human | human stool | UK | 2011 | ST 50   | ST-21 complex  | Yahara et al 2016 | - |
| 2217 | OXC5903 | human | human stool | UK | 2011 | ST 257  | ST-257 complex | Yahara et al 2016 | - |
| 2219 | OXC5905 | human | human stool | UK | 2011 | ST 50   | ST-21 complex  | Yahara et al 2016 | - |
| 2220 | OXC5906 | human | human stool | UK | 2011 | ST 50   | ST-21 complex  | Yahara et al 2016 | - |
| 2221 | OXC5907 | human | human stool | UK | 2011 | ST 257  | ST-257 complex | Yahara et al 2016 | - |
| 2223 | OXC5909 | human | human stool | UK | 2011 | ST 53   | ST-21 complex  | Yahara et al 2016 | - |
| 2225 | OXC5911 | human | human stool | UK | 2011 | ST 5247 | ST-353 complex | Yahara et al 2016 | - |
| 2227 | OXC5914 | human | human stool | UK | 2011 | ST 574  | ST-574 complex | Yahara et al 2016 | - |

|      |         |          |             |        |      |         |                |                   |   |
|------|---------|----------|-------------|--------|------|---------|----------------|-------------------|---|
| 2228 | OXC5915 | human    | human stool | UK     | 2011 | ST 257  | ST-257 complex | Yahara et al 2016 | - |
| 2229 | OXC5916 | human    | human stool | UK     | 2011 | ST 990  | ST-257 complex | Yahara et al 2016 | - |
| 2230 | OXC5917 | human    | human stool | UK     | 2011 | ST 52   | ST-52 complex  | Yahara et al 2016 | - |
| 2231 | OXC5918 | human    | human stool | UK     | 2011 | ST 53   | ST-21 complex  | Yahara et al 2016 | - |
| 2232 | OXC5937 | human    | human stool | UK     | 2011 | ST 21   | ST-21 complex  | Yahara et al 2016 | - |
| 2236 | OXC5941 | human    | human stool | UK     | 2011 | ST 45   | ST-45 complex  | Yahara et al 2016 | - |
| 2240 | OXC5924 | human    | human stool | UK     | 2011 | ST 21   | ST-21 complex  | Yahara et al 2016 | - |
| 2241 | OXC5925 | human    | human stool | UK     | 2011 | ST 50   | ST-21 complex  | Yahara et al 2016 | - |
| 2242 | OXC5926 | human    | human stool | UK     | 2011 | ST 50   | ST-21 complex  | Yahara et al 2016 | - |
| 2243 | OXC5927 | human    | human stool | UK     | 2011 | ST 2033 | ST-354 complex | Yahara et al 2016 | - |
| 2244 | OXC5928 | human    | human stool | UK     | 2011 | ST 6602 | ST-443 complex | Yahara et al 2016 | - |
| 2245 | OXC5929 | human    | human stool | UK     | 2011 | ST 21   | ST-21 complex  | Yahara et al 2016 | - |
| 2246 | OXC5930 | human    | human stool | UK     | 2011 | ST 48   | ST-48 complex  | Yahara et al 2016 | - |
| 2247 | OXC5931 | human    | human stool | UK     | 2011 | ST 353  | ST-353 complex | Yahara et al 2016 | - |
| 2255 | B2      | ruminant | cattle      | Canada | -    | ST 61   | ST-61 complex  | Pascoe et al 2016 | - |
| 2256 | B3      | ruminant | cattle      | Canada | -    | ST 21   | ST-21 complex  | Pascoe et al 2016 | - |

|      |     |             |         |        |   |         |                |                   |   |
|------|-----|-------------|---------|--------|---|---------|----------------|-------------------|---|
| 2257 | B4  | ruminant    | cattle  | Canada | - | ST 21   | ST-21 complex  | Pascoe et al 2016 | - |
| 2258 | C1  | chicken     | chicken | Canada | - | ST 45   | ST-45 complex  | Pascoe et al 2016 | - |
| 2259 | C10 | chicken     | chicken | Canada | - | ST 924  | ST-607 complex | Pascoe et al 2016 | - |
| 2260 | C11 | chicken     | chicken | Canada | - | ST 48   | ST-48 complex  | Pascoe et al 2016 | - |
| 2261 | C12 | chicken     | chicken | Canada | - | ST 48   | ST-48 complex  | Pascoe et al 2016 | - |
| 2262 | C13 | chicken     | chicken | Canada | - | ST 982  | ST-21 complex  | Pascoe et al 2016 | - |
| 2265 | C16 | chicken     | chicken | Canada | - | ST 45   | ST-45 complex  | Pascoe et al 2016 | - |
| 2266 | C2  | chicken     | chicken | Canada | - | ST 45   | ST-45 complex  | Pascoe et al 2016 | - |
| 2267 | C3  | chicken     | chicken | Canada | - | ST 460  | ST-460 complex | Pascoe et al 2016 | - |
| 2268 | C4  | chicken     | chicken | Canada | - | ST 460  | ST-460 complex | Pascoe et al 2016 | - |
| 2269 | C5  | chicken     | chicken | Canada | - | ST 460  | ST-460 complex | Pascoe et al 2016 | - |
| 2270 | C6  | chicken     | chicken | Canada | - | ST 929  | ST-257 complex | Pascoe et al 2016 | - |
| 2271 | C7  | chicken     | chicken | Canada | - | ST 929  | ST-257 complex | Pascoe et al 2016 | - |
| 2272 | C8  | chicken     | chicken | Canada | - | ST 924  | ST-607 complex | Pascoe et al 2016 | - |
| 2273 | C9  | chicken     | chicken | Canada | - | -       | -              | Pascoe et al 2016 | - |
| 2313 | S1  | environment |         | Canada | - | ST 4186 | ST-179 complex | Pascoe et al 2016 | - |

|      |     |             |        |   |        |                |                   |   |
|------|-----|-------------|--------|---|--------|----------------|-------------------|---|
| 2314 | S2  | environment | Canada | - | ST 45  | ST-45 complex  | Pascoe et al 2016 | - |
| 2315 | S3  | environment | Canada | - | ST 45  | ST-45 complex  | Pascoe et al 2016 | - |
| 2317 | S5  | environment | Canada | - | ST 538 | ST-45 complex  | Pascoe et al 2016 | - |
| 2318 | S6  | environment | Canada | - | ST 45  | ST-45 complex  | Pascoe et al 2016 | - |
| 2323 | W10 | environment | Canada | - | ST 61  | ST-61 complex  | Pascoe et al 2016 | - |
| 2324 | W11 | environment | Canada | - | ST 61  | ST-61 complex  | Pascoe et al 2016 | - |
| 2325 | W12 | environment | Canada | - | ST 929 | ST-257 complex | Pascoe et al 2016 | - |
| 2326 | W13 | environment | Canada | - | ST 693 | -              | Pascoe et al 2016 | - |
| 2327 | W14 | environment | Canada | - | ST 8   | ST-21 complex  | Pascoe et al 2016 | - |
| 2328 | W15 | environment | Canada | - | ST 8   | ST-21 complex  | Pascoe et al 2016 | - |
| 2329 | W16 | environment | Canada | - | ST 991 | ST-692 complex | Pascoe et al 2016 | - |
| 2330 | W17 | environment | Canada | - | ST 8   | ST-21 complex  | Pascoe et al 2016 | - |
| 2331 | W18 | environment | Canada | - | ST 929 | ST-257 complex | Pascoe et al 2016 | - |
| 2332 | W19 | environment | Canada | - | -      | -              | Pascoe et al 2016 | - |
| 2333 | W2  | environment | Canada | - | ST 459 | ST-42 complex  | Pascoe et al 2016 | - |
| 2334 | W20 | environment | Canada | - | ST 991 | ST-692 complex | Pascoe et al 2016 | - |



|      |     |             |        |   |         |                   |                      |   |
|------|-----|-------------|--------|---|---------|-------------------|----------------------|---|
| 2335 | W21 | environment | Canada | - | -       | -                 | Pascoe et al<br>2016 | - |
| 2336 | W22 | environment | Canada | - | ST 45   | ST-45<br>complex  | Pascoe et al<br>2016 | - |
| 2338 | W24 | environment | Canada | - | ST 45   | ST-45<br>complex  | Pascoe et al<br>2016 | - |
| 2339 | W25 | environment | Canada | - | -       | -                 | Pascoe et al<br>2016 | - |
| 2341 | W27 | environment | Canada | - | ST 267  | ST-283<br>complex | Pascoe et al<br>2016 | - |
| 2342 | W28 | environment | Canada | - | ST 991  | ST-692<br>complex | Pascoe et al<br>2016 | - |
| 2343 | W29 | environment | Canada | - | ST 538  | ST-45<br>complex  | Pascoe et al<br>2016 | - |
| 2345 | W30 | environment | Canada | - | ST 929  | ST-257<br>complex | Pascoe et al<br>2016 | - |
| 2346 | W31 | environment | Canada | - | ST 538  | ST-45<br>complex  | Pascoe et al<br>2016 | - |
| 2347 | W32 | environment | Canada | - | ST 267  | ST-283<br>complex | Pascoe et al<br>2016 | - |
| 2348 | W33 | environment | Canada | - | ST 4186 | ST-179<br>complex | Pascoe et al<br>2016 | - |
| 2349 | W34 | environment | Canada | - | ST 45   | ST-45<br>complex  | Pascoe et al<br>2016 | - |
| 2350 | W35 | environment | Canada | - | ST 267  | ST-283<br>complex | Pascoe et al<br>2016 | - |
| 2351 | W36 | environment | Canada | - | ST 267  | ST-283<br>complex | Pascoe et al<br>2016 | - |
| 2352 | W37 | environment | Canada | - | ST 267  | ST-283<br>complex | Pascoe et al<br>2016 | - |
| 2353 | W38 | environment | Canada | - | ST 267  | ST-283<br>complex | Pascoe et al<br>2016 | - |

|      |         |             |         |        |      |         |                |                   |   |
|------|---------|-------------|---------|--------|------|---------|----------------|-------------------|---|
| 2354 | W39     | environment |         | Canada | -    | ST 45   | ST-45 complex  | Pascoe et al 2016 | - |
| 2355 | W4      | environment |         | Canada | -    | ST 45   | ST-45 complex  | Pascoe et al 2016 | - |
| 2356 | W40     | environment |         | Canada | -    | ST 4186 | ST-179 complex | Pascoe et al 2016 | - |
| 2357 | W41     | environment |         | Canada | -    | ST 459  | ST-42 complex  | Pascoe et al 2016 | - |
| 2358 | W42     | environment |         | Canada | -    | ST 459  | ST-42 complex  | Pascoe et al 2016 | - |
| 2359 | W43     | environment |         | Canada | -    | -       | -              | Pascoe et al 2016 | - |
| 2360 | W44     | environment |         | Canada | -    | ST 806  | ST-21 complex  | Pascoe et al 2016 | - |
| 2361 | W45     | environment |         | Canada | -    | ST 459  | ST-42 complex  | Pascoe et al 2016 | - |
| 2362 | W46     | environment |         | Canada | -    | ST 933  | ST-403 complex | Pascoe et al 2016 | - |
| 2364 | W6      | environment |         | Canada | -    | -       | -              | Pascoe et al 2016 | - |
| 2367 | W9      | environment |         | Canada | -    | ST 45   | ST-45 complex  | Pascoe et al 2016 | - |
| 2469 | RM9357  | ruminant    | cattle  | USA    | 2012 | -       | -              | Unpublished       | - |
| 2470 | RM9168  | ruminant    | cattle  | USA    | 2012 | ST 21   | ST-21 complex  | Unpublished       | - |
| 2471 | RM8893  | ruminant    | cattle  | USA    | 2012 | ST 8    | ST-21 complex  | Unpublished       | - |
| 2472 | RM8004  | ruminant    | cattle  | USA    | 2012 | ST 806  | ST-21 complex  | Unpublished       | - |
| 2475 | RM10985 | ruminant    | cattle  | USA    | 2012 | ST 21   | ST-21 complex  | Unpublished       | - |
| 2476 | D42a    | chicken     | chicken | USA    | 2005 | ST 21   | ST-21 complex  | Unpublished       | - |

|      |         |          |         |             |      |        |               |             |   |
|------|---------|----------|---------|-------------|------|--------|---------------|-------------|---|
| 2479 | RM12500 | ruminant | cattle  | USA         | 2012 | ST 61  | ST-61 complex | Unpublished | - |
| 3004 | SS_1029 | chicken  | chicken | UK          | -    | ST 61  | ST-61 complex | Unpublished | - |
| 3007 | SS_1034 | ruminant | cattle  | Netherlands | -    | ST 60  | ST-61 complex | Unpublished | - |
| 3008 | SS_1035 | ruminant | cattle  | UK          | -    | ST 61  | ST-61 complex | Unpublished | - |
| 3009 | SS_1036 | ruminant | cattle  | UK          | -    | ST 61  | ST-61 complex | Unpublished | - |
| 3011 | SS_1040 | ruminant | cattle  | UK          | -    | ST 61  | ST-61 complex | Unpublished | - |
| 3012 | SS_1045 | ruminant | cattle  | UK          | -    | -      | -             | Unpublished | - |
| 3014 | SS_1050 | ruminant | cattle  | UK          | -    | ST 61  | ST-61 complex | Unpublished | - |
| 3016 | SS_1052 | ruminant | cattle  | UK          | -    | ST 864 | ST-61 complex | Unpublished | - |
| 3018 | SS_1061 | ruminant | cattle  | UK          | -    | ST 61  | ST-61 complex | Unpublished | - |
| 3019 | SS_1062 | ruminant | sheep   | UK          | -    | ST 61  | ST-61 complex | Unpublished | - |
| 3020 | SS_1063 | ruminant | cattle  | UK          | -    | ST 61  | ST-61 complex | Unpublished | - |
| 3021 | SS_1064 | ruminant | cattle  | UK          | -    | ST 61  | ST-61 complex | Unpublished | - |
| 3023 | SS_1067 | ruminant | cattle  | UK          | -    | ST 820 | ST-61 complex | Unpublished | - |
| 3024 | SS_1069 | ruminant | sheep   | UK          | -    | ST 61  | ST-61 complex | Unpublished | - |
| 3025 | SS_1070 | ruminant | cattle  | UK          | -    | ST 61  | ST-61 complex | Unpublished | - |
| 3027 | SS_1072 | ruminant | sheep   | UK          | -    | ST 61  | ST-61 complex | Unpublished | - |

|      |        |             |               |        |      |         |                |             |            |
|------|--------|-------------|---------------|--------|------|---------|----------------|-------------|------------|
| 3032 | SS_975 | environment | wild bird     | N/A    | 2001 | ST 1342 | -              | Unpublished | -          |
| 4713 | AC0264 | chicken     | caecal sample | France | 2008 | ST 19   | ST-21 complex  | This study  | SRR5123337 |
| 4714 | AC0281 | chicken     | carcass swab  | France | 2008 | ST 19   | ST-21 complex  | This study  | SRR5123317 |
| 4715 | AC0302 | chicken     | caecal sample | France | 2008 | ST 290  | ST-206 complex | This study  | SRR5123444 |
| 4716 | AC0400 | chicken     | carcass swab  | France | 2008 | ST 45   | ST-45 complex  | This study  | SRR5123373 |
| 4717 | AC0465 | chicken     | carcass swab  | France | 2008 | ST 1964 | ST-45 complex  | This study  | SRR5123374 |
| 4718 | AC0473 | chicken     | carcass swab  | France | 2008 | ST 21   | ST-21 complex  | This study  | SRR5123348 |
| 4719 | AC0559 | chicken     | caecal sample | France | 2008 | ST 6071 | ST-48 complex  | This study  | SRR5123308 |
| 4720 | AC0568 | chicken     | carcass swab  | France | 2008 | ST 21   | ST-21 complex  | This study  | SRR5123466 |
| 4721 | AC0691 | chicken     | carcass swab  | France | 2008 | ST 2197 | ST-45 complex  | This study  | SRR5123474 |
| 4722 | AC0745 | chicken     | carcass swab  | France | 2008 | ST 50   | ST-21 complex  | This study  | SRR5123318 |
| 4723 | AC0791 | chicken     | caecal sample | France | 2008 | ST 5904 | ST-48 complex  | This study  | SRR5123500 |
| 4724 | AC0927 | chicken     | carcass swab  | France | 2008 | ST 400  | ST-353 complex | This study  | SRR5123402 |
| 4725 | AC0994 | chicken     | carcass swab  | France | 2008 | ST 21   | ST-21 complex  | This study  | SRR5123469 |
| 4726 | AC1136 | chicken     | carcass swab  | France | 2008 | ST 19   | ST-21 complex  | This study  | SRR5123333 |
| 4727 | AC1151 | chicken     | carcass swab  | France | 2008 | ST 883  | ST-21 complex  | This study  | SRR5123478 |
| 4728 | AC1363 | chicken     | carcass swab  | France | 2008 | ST 122  | ST-206 complex | This study  | SRR5123494 |

|      |        |         |                       |        |      |         |                |            |            |
|------|--------|---------|-----------------------|--------|------|---------|----------------|------------|------------|
| 4729 | AC1474 | chicken | carcass swab          | France | 2008 | ST 19   | ST-21 complex  | This study | SRR5123320 |
| 4730 | AC1476 | chicken | carcass swab          | France | 2008 | ST 19   | ST-21 complex  | This study | SRR5123496 |
| 4731 | AC2327 | chicken | carcass swab          | France | 2008 | ST 6418 | ST-206 complex | This study | SRR5123298 |
| 4732 | AC2811 | chicken | caecal sample         | France | 2008 | ST 21   | ST-21 complex  | This study | SRR5123504 |
| 4733 | AC2823 | chicken | carcass swab          | France | 2008 | ST 19   | ST-21 complex  | This study | SRR5123301 |
| 4734 | AC3107 | chicken | caecal sample         | France | 2008 | ST 19   | ST-21 complex  | This study | SRR5123322 |
| 4735 | AC3201 | chicken | caecal sample         | France | 2008 | ST 50   | ST-21 complex  | This study | SRR5123338 |
| 4736 | AC3497 | chicken | caecal sample         | France | 2008 | ST 19   | ST-21 complex  | This study | SRR5123344 |
| 4737 | AC3940 | chicken | carcass swab          | France | 2008 | ST 221  | ST-206 complex | This study | SRR5123483 |
| 4738 | AC4322 | chicken | caecal sample         | France | 2008 | ST 4823 | ST-464 complex | This study | SRR5123475 |
| 4739 | AC4401 | chicken | carcass swab          | France | 2008 | ST 6360 | ST-353 complex | This study | SRR5123358 |
| 4740 | AC4520 | chicken | carcass swab          | France | 2008 | ST 475  | ST-48 complex  | This study | SRR5123421 |
| 4741 | AC4896 | chicken | carcass swab          | France | 2008 | ST 48   | ST-48 complex  | This study | SRR5123415 |
| 4742 | C0113  | chicken | chicken offal or meat | France | 2009 | ST 45   | ST-45 complex  | This study | SRR5123371 |
| 4743 | C0118  | chicken | chicken offal or meat | France | 2009 | ST 21   | ST-21 complex  | This study | SRR5123357 |
| 4744 | C0185  | chicken | chicken offal or meat | France | 2009 | ST 19   | ST-21 complex  | This study | SRR5123354 |

|      |       |         |                          |        |      |         |                   |            |            |
|------|-------|---------|--------------------------|--------|------|---------|-------------------|------------|------------|
| 4745 | C0191 | chicken | chicken offal<br>or meat | France | 2009 | ST 464  | ST-464<br>complex | This study | SRR5123477 |
| 4746 | C0230 | chicken | chicken offal<br>or meat | France | 2009 | ST 47   | ST-21<br>complex  | This study | SRR5123397 |
| 4747 | C0274 | chicken | chicken offal<br>or meat | France | 2009 | ST 19   | ST-21<br>complex  | This study | SRR5123472 |
| 4748 | C0276 | chicken | chicken offal<br>or meat | France | 2009 | ST 19   | ST-21<br>complex  | This study | SRR5123455 |
| 4749 | C0303 | chicken | chicken offal<br>or meat | France | 2009 | ST 475  | ST-48<br>complex  | This study | SRR5123363 |
| 4750 | C0402 | chicken | chicken offal<br>or meat | France | 2009 | ST 19   | ST-21<br>complex  | This study | SRR5123458 |
| 4751 | C0519 | chicken | chicken offal<br>or meat | France | 2009 | ST 19   | ST-21<br>complex  | This study | SRR5123353 |
| 4752 | C0531 | chicken | chicken offal<br>or meat | France | 2009 | ST 3547 | ST-206<br>complex | This study | SRR5123394 |
| 4753 | C0743 | chicken | chicken offal<br>or meat | France | 2009 | ST 48   | ST-48<br>complex  | This study | SRR5123309 |
| 4754 | C0757 | chicken | chicken offal<br>or meat | France | 2009 | ST 2882 | ST-353<br>complex | This study | SRR5123380 |
| 4755 | C0784 | chicken | chicken offal<br>or meat | France | 2009 | ST 3633 | ST-21<br>complex  | This study | SRR5123316 |
| 4756 | C0848 | chicken | chicken offal<br>or meat | France | 2009 | ST 137  | ST-45<br>complex  | This study | SRR5123443 |
| 4757 | C1055 | chicken | chicken offal<br>or meat | France | 2009 | ST 334  | ST-45<br>complex  | This study | SRR5123479 |
| 4758 | C1061 | chicken | chicken offal<br>or meat | France | 2009 | ST 19   | ST-21<br>complex  | This study | SRR5123393 |
| 4759 | C1141 | chicken | chicken offal<br>or meat | France | 2009 | ST 19   | ST-21<br>complex  | This study | SRR5123307 |
| 4760 | C1251 | chicken | chicken offal<br>or meat | France | 2009 | ST 21   | ST-21<br>complex  | This study | SRR5123405 |

|      |             |          |                          |        |      |         |                   |            |            |
|------|-------------|----------|--------------------------|--------|------|---------|-------------------|------------|------------|
| 4761 | C1267       | chicken  | chicken offal<br>or meat | France | 2009 | ST 21   | ST-21<br>complex  | This study | SRR5123331 |
| 4762 | C1387       | chicken  | chicken offal<br>or meat | France | 2009 | ST 19   | ST-21<br>complex  | This study | SRR5123481 |
| 4763 | C1516       | chicken  | chicken offal<br>or meat | France | 2009 | ST 19   | ST-21<br>complex  | This study | SRR5123501 |
| 4764 | C1656       | chicken  | chicken offal<br>or meat | France | 2009 | ST 400  | ST-353<br>complex | This study | SRR5123367 |
| 4765 | C1658       | chicken  | chicken offal<br>or meat | France | 2009 | ST 5356 | ST-464<br>complex | This study | SRR5123502 |
| 4767 | C1863       | chicken  | chicken offal<br>or meat | France | 2009 | ST 464  | ST-464<br>complex | This study | SRR5123449 |
| 4768 | C1871       | chicken  | chicken offal<br>or meat | France | 2009 | ST 21   | ST-21<br>complex  | This study | SRR5123352 |
| 4769 | C2094       | chicken  | chicken offal<br>or meat | France | 2009 | ST 5138 | ST-206<br>complex | This study | SRR5123440 |
| 4770 | C2122       | chicken  | chicken offal<br>or meat | France | 2009 | ST 356  | ST-353<br>complex | This study | SRR5123297 |
| 4771 | C2228       | chicken  | chicken offal<br>or meat | France | 2009 | ST 5268 | ST-464<br>complex | This study | SRR5123451 |
| 4772 | C2234       | chicken  | chicken offal<br>or meat | France | 2009 | ST 21   | ST-21<br>complex  | This study | SRR5123468 |
| 4773 | C2240       | chicken  | chicken offal<br>or meat | France | 2009 | ST 45   | ST-45<br>complex  | This study | SRR5123395 |
| 4774 | C2244       | chicken  | chicken offal<br>or meat | France | 2009 | ST 48   | ST-48<br>complex  | This study | SRR5123342 |
| 4775 | C2257       | chicken  | chicken offal<br>or meat | France | 2009 | ST 572  | ST-206<br>complex | This study | SRR5123418 |
| 4776 | C97anses640 | chicken  | carcass swab             | France | 2008 | ST 334  | ST-45<br>complex  | This study | SRR5123410 |
| 4777 | CB0004      | ruminant | cattle                   | France | 2013 | ST 45   | ST-45<br>complex  | This study | SRR5123437 |

|      |        |          |        |        |      |         |                   |            |            |
|------|--------|----------|--------|--------|------|---------|-------------------|------------|------------|
| 4778 | CB0011 | ruminant | cattle | France | 2013 | ST 19   | ST-21<br>complex  | This study | SRR5123350 |
| 4779 | CB0012 | ruminant | cattle | France | 2013 | ST 21   | ST-21<br>complex  | This study | SRR5123335 |
| 4780 | CB0013 | ruminant | cattle | France | 2013 | ST 48   | ST-48<br>complex  | This study | SRR5123419 |
| 4781 | CB0023 | ruminant | cattle | France | 2013 | ST 5359 | ST-48<br>complex  | This study | SRR5123341 |
| 4782 | CB0030 | ruminant | cattle | France | 2013 | ST 21   | ST-21<br>complex  | This study | SRR5123389 |
| 4783 | CB0031 | ruminant | cattle | France | 2013 | ST 586  | -                 | This study | SRR5123387 |
| 4784 | CB0061 | ruminant | cattle | France | 2013 | ST 48   | ST-48<br>complex  | This study | SRR5123366 |
| 4785 | CB0072 | ruminant | cattle | France | 2013 | ST 19   | ST-21<br>complex  | This study | SRR5123456 |
| 4786 | CB0084 | ruminant | cattle | France | 2013 | ST 418  | ST-45<br>complex  | This study | SRR5123432 |
| 4787 | CB0089 | ruminant | cattle | France | 2013 | ST 270  | ST-403<br>complex | This study | SRR5123427 |
| 4788 | CB0091 | ruminant | cattle | France | 2013 | ST 42   | ST-42<br>complex  | This study | SRR5123447 |
| 4789 | CB0096 | ruminant | cattle | France | 2013 | ST 45   | ST-45<br>complex  | This study | SRR5123336 |
| 4790 | CTA007 | pet      | dog    | France | 2014 | -       | -                 | This study | SRR5123378 |
| 4791 | CTA011 | pet      | cat    | France | 2014 | ST 6360 | ST-353<br>complex | This study | SRR5123506 |
| 4792 | CTA023 | pet      | dog    | France | 2014 | ST 586  | -                 | This study | SRR5123328 |
| 4793 | CTA025 | pet      | dog    | France | 2014 | ST 586  | -                 | This study | SRR5123310 |
| 4794 | CTA029 | pet      | dog    | France | 2014 | ST 586  | -                 | This study | SRR5123351 |
| 4795 | CTA035 | pet      | cat    | France | 2015 | -       | -                 | This study | SRR5123321 |
| 4796 | CTA040 | pet      | cat    | France | 2015 | -       | -                 | This study | SRR5123467 |
| 4797 | CTA043 | pet      | dog    | France | 2015 | ST 45   | ST-45<br>complex  | This study | SRR5123411 |



|      |        |     |     |        |      |        |                   |            |            |
|------|--------|-----|-----|--------|------|--------|-------------------|------------|------------|
| 4798 | CTA057 | pet | dog | France | 2015 | ST 270 | ST-403<br>complex | This study | SRR5123441 |
| 4799 | CTA075 | pet | dog | France | 2015 | ST 122 | ST-206<br>complex | This study | SRR5123464 |
| 4800 | CTA082 | pet | dog | France | 2015 | ST 122 | ST-206<br>complex | This study | SRR5123492 |
| 4801 | CTA093 | pet | dog | France | 2015 | ST 50  | ST-21<br>complex  | This study | SRR5123497 |
| 4802 | CTA110 | pet | dog | France | 2015 | ST 353 | ST-353<br>complex | This study | SRR5123507 |
| 4803 | CTA179 | pet | dog | France | 2015 | ST 45  | ST-45<br>complex  | This study | SRR5123433 |
| 4804 | CTA186 | pet | cat | France | 2015 | ST 122 | ST-206<br>complex | This study | SRR5123442 |
| 4805 | CTA201 | pet | dog | France | 2015 | -      | -                 | This study | SRR5123491 |
| 4806 | CTA215 | pet | dog | France | 2015 | ST 257 | ST-257<br>complex | This study | SRR5123423 |
| 4807 | CTA230 | pet | dog | France | 2015 | ST 45  | ST-45<br>complex  | This study | SRR5123304 |
| 4808 | CTA242 | pet | dog | France | 2015 | -      | -                 | This study | SRR5123364 |
| 4809 | CTA244 | pet | dog | France | 2015 | ST 45  | ST-45<br>complex  | This study | SRR5123416 |
| 4810 | CTA247 | pet | dog | France | 2015 | ST 403 | ST-403<br>complex | This study | SRR5123446 |
| 4811 | CTA277 | pet | dog | France | 2015 | ST 45  | ST-45<br>complex  | This study | SRR5123407 |
| 4812 | CTA282 | pet | dog | France | 2015 | ST 267 | ST-283<br>complex | This study | SRR5123360 |
| 4813 | CTA286 | pet | dog | France | 2015 | ST 267 | ST-283<br>complex | This study | SRR5123465 |
| 4814 | CTA295 | pet | dog | France | 2015 | -      | -                 | This study | SRR5123445 |
| 4815 | CTA306 | pet | dog | France | 2015 | ST 48  | ST-48<br>complex  | This study | SRR5123319 |

|      |        |     |     |        |      |         |                   |            |            |
|------|--------|-----|-----|--------|------|---------|-------------------|------------|------------|
| 4816 | CTA321 | pet | dog | France | 2015 | -       | -                 | This study | SRR5123436 |
| 4817 | CTA331 | pet | dog | France | 2015 | ST 267  | ST-283<br>complex | This study | SRR5123495 |
| 4818 | CTA415 | pet | dog | France | 2015 | ST 6674 | ST-403<br>complex | This study | SRR5123462 |
| 4819 | CTA417 | pet | dog | France | 2015 | -       | -                 | This study | SRR5123401 |
| 4820 | CTA430 | pet | dog | France | 2015 | ST 2187 | ST-508<br>complex | This study | SRR5123454 |
| 4821 | CTA468 | pet | dog | France | 2015 | ST 267  | ST-283<br>complex | This study | SRR5123299 |
| 4822 | CTA473 | pet | dog | France | 2015 | ST 45   | ST-45<br>complex  | This study | SRR5123493 |
| 4823 | CTA483 | pet | dog | France | 2015 | ST 2066 | ST-52<br>complex  | This study | SRR5123382 |
| 4824 | CTA503 | pet | dog | France | 2015 | ST 6674 | ST-403<br>complex | This study | SRR5123488 |
| 4825 | CTA526 | pet | cat | France | 2015 | -       | -                 | This study | SRR5123379 |
| 4826 | CTA560 | pet | dog | France | 2015 | ST 52   | ST-52<br>complex  | This study | SRR5123362 |
| 4827 | CTA592 | pet | dog | France | 2015 | ST 52   | ST-52<br>complex  | This study | SRR5123435 |
| 4828 | CTA595 | pet | dog | France | 2015 | -       | -                 | This study | SRR5123426 |
| 4829 | CTA628 | pet | dog | France | 2015 | ST 6674 | ST-403<br>complex | This study | SRR5123413 |
| 4830 | CTA666 | pet | dog | France | 2015 | -       | -                 | This study | SRR5123330 |
| 4831 | CTA675 | pet | dog | France | 2015 | -       | -                 | This study | SRR5123300 |
| 4832 | CTA693 | pet | dog | France | 2015 | ST 50   | ST-21<br>complex  | This study | SRR5123404 |
| 4833 | CTA702 | pet | dog | France | 2015 | -       | -                 | This study | SRR5123486 |
| 4834 | CTA710 | pet | dog | France | 2015 | -       | -                 | This study | SRR5123434 |
| 4835 | CTA735 | pet | dog | France | 2015 | ST 2066 | ST-52<br>complex  | This study | SRR5123326 |

|      |          |         |                   |        |      |         |                |            |            |
|------|----------|---------|-------------------|--------|------|---------|----------------|------------|------------|
| 4836 | CTA736   | pet     | dog               | France | 2015 | ST 21   | ST-21 complex  | This study | SRR5123450 |
| 4837 | CTA738   | pet     | dog               | France | 2015 | ST 21   | ST-21 complex  | This study | SRR5123370 |
| 4838 | CTA780   | pet     | dog               | France | 2015 | ST 45   | ST-45 complex  | This study | SRR5123384 |
| 4839 | CTA789   | pet     | dog               | France | 2015 | ST 354  | ST-354 complex | This study | SRR5123356 |
| 4840 | CTA792   | pet     | dog               | France | 2015 | ST 353  | ST-353 complex | This study | SRR5123315 |
| 4841 | CTA801   | pet     | cat               | France | 2015 | ST 267  | ST-283 complex | This study | SRR5123376 |
| 4842 | CTA806   | pet     | cat               | France | 2015 | ST 267  | ST-283 complex | This study | SRR5123377 |
| 4843 | CTA848   | pet     | dog               | France | 2015 | ST 19   | ST-21 complex  | This study | SRR5123329 |
| 4844 | CTA855   | pet     | dog               | France | 2015 | ST 6674 | ST-403 complex | This study | SRR5123498 |
| 4845 | ECR105.1 | chicken | caecal sample     | France | 2008 | ST 3574 | ST-21 complex  | This study | SRR5123296 |
| 4846 | ECR150.1 | chicken | caecal sample     | France | 2008 | ST 6076 | ST-45 complex  | This study | SRR5123503 |
| 4847 | H0026    | human   | human unspecified | France | 2009 | ST 475  | ST-48 complex  | This study | SRR5123459 |
| 4848 | H0035    | human   | human unspecified | France | 2009 | ST 21   | ST-21 complex  | This study | SRR5123430 |
| 4849 | H0044    | human   | human unspecified | France | 2009 | ST 475  | ST-48 complex  | This study | SRR5123408 |
| 4850 | H0058    | human   | human unspecified | France | 2009 | ST 21   | ST-21 complex  | This study | SRR5123332 |
| 4851 | H0065    | human   | human unspecified | France | 2009 | ST 19   | ST-21 complex  | This study | SRR5123396 |

|      |       |       |                      |        |      |         |                   |            |            |
|------|-------|-------|----------------------|--------|------|---------|-------------------|------------|------------|
| 4852 | H0070 | human | human<br>unspecified | France | 2009 | ST 46   | ST-206<br>complex | This study | SRR5123425 |
| 4853 | H0079 | human | human<br>unspecified | France | 2009 | ST 21   | ST-21<br>complex  | This study | SRR5123463 |
| 4854 | H0094 | human | human<br>unspecified | France | 2009 | ST 48   | ST-48<br>complex  | This study | SRR5123428 |
| 4855 | H0097 | human | human<br>unspecified | France | 2009 | ST 5740 | ST-206<br>complex | This study | SRR5123334 |
| 4856 | H0148 | human | human<br>unspecified | France | 2009 | ST 2882 | ST-353<br>complex | This study | SRR5123417 |
| 4857 | H0149 | human | human<br>unspecified | France | 2009 | ST 21   | ST-21<br>complex  | This study | SRR5123306 |
| 4858 | H0198 | human | human<br>unspecified | France | 2009 | ST 400  | ST-353<br>complex | This study | SRR5123388 |
| 4859 | H0232 | human | human<br>unspecified | France | 2009 | ST 883  | ST-21<br>complex  | This study | SRR5123323 |
| 4860 | H0234 | human | human<br>unspecified | France | 2009 | ST 1949 | ST-21<br>complex  | This study | SRR5123383 |
| 4861 | H0253 | human | human<br>unspecified | France | 2009 | ST 21   | ST-21<br>complex  | This study | SRR5123345 |
| 4862 | H0271 | human | human<br>unspecified | France | 2009 | ST 2262 | ST-48<br>complex  | This study | SRR5123324 |
| 4863 | H0296 | human | human<br>unspecified | France | 2009 | ST 21   | ST-21<br>complex  | This study | SRR5123399 |
| 4864 | H0357 | human | human<br>unspecified | France | 2009 | ST 45   | ST-45<br>complex  | This study | SRR5123391 |
| 4865 | H0436 | human | human<br>unspecified | France | 2009 | ST 45   | ST-45<br>complex  | This study | SRR5123303 |
| 4866 | H0450 | human | human<br>unspecified | France | 2009 | ST 418  | ST-45<br>complex  | This study | SRR5123461 |
| 4867 | H0465 | human | human<br>unspecified | France | 2009 | ST 21   | ST-21<br>complex  | This study | SRR5123487 |

|      |       |       |                      |        |      |         |                   |            |            |
|------|-------|-------|----------------------|--------|------|---------|-------------------|------------|------------|
| 4868 | H0483 | human | human<br>unspecified | France | 2009 | ST 290  | ST-206<br>complex | This study | SRR5123476 |
| 4869 | H0544 | human | human<br>unspecified | France | 2009 | ST 464  | ST-464<br>complex | This study | SRR5123457 |
| 4870 | H0553 | human | human<br>unspecified | France | 2009 | ST 21   | ST-21<br>complex  | This study | SRR5123409 |
| 4871 | H0604 | human | human<br>unspecified | France | 2009 | ST 464  | ST-464<br>complex | This study | SRR5123505 |
| 4872 | H0624 | human | human<br>unspecified | France | 2009 | ST 21   | ST-21<br>complex  | This study | SRR5123471 |
| 4873 | H0642 | human | human<br>unspecified | France | 2009 | ST 21   | ST-21<br>complex  | This study | SRR5123313 |
| 4874 | H0677 | human | human<br>unspecified | France | 2009 | ST 572  | ST-206<br>complex | This study | SRR5123369 |
| 4875 | H0679 | human | human<br>unspecified | France | 2009 | ST 5751 | ST-353<br>complex | This study | SRR5123453 |
| 4876 | H0701 | human | human<br>unspecified | France | 2009 | ST 47   | ST-21<br>complex  | This study | SRR5123400 |
| 4877 | H0702 | human | human<br>unspecified | France | 2009 | ST 21   | ST-21<br>complex  | This study | SRR5123314 |
| 4878 | H0711 | human | human<br>unspecified | France | 2009 | ST 464  | ST-464<br>complex | This study | SRR5123422 |
| 4879 | H0712 | human | human<br>unspecified | France | 2009 | ST 464  | ST-464<br>complex | This study | SRR5123375 |
| 4880 | H0783 | human | human<br>unspecified | France | 2009 | ST 5    | ST-353<br>complex | This study | SRR5123365 |
| 4881 | H0864 | human | human<br>unspecified | France | 2009 | ST 122  | ST-206<br>complex | This study | SRR5123386 |
| 4882 | H0998 | human | human<br>unspecified | France | 2009 | ST 21   | ST-21<br>complex  | This study | SRR5123424 |
| 4883 | H1003 | human | human<br>unspecified | France | 2009 | ST 21   | ST-21<br>complex  | This study | SRR5123448 |

|      |         |             |                      |        |      |         |                 |            |            |
|------|---------|-------------|----------------------|--------|------|---------|-----------------|------------|------------|
| 4884 | H1460   | human       | human unspecified    | France | 2009 | ST 5747 | ST-48 complex   | This study | SRR5123460 |
| 4885 | H1911   | human       | human unspecified    | France | 2009 | ST 356  | ST-353 complex  | This study | SRR5123392 |
| 4886 | H2696   | human       | human unspecified    | France | 2009 | ST 353  | ST-353 complex  | This study | SRR5123390 |
| 4887 | IFR0079 | environment | environmental waters | France | 2013 | ST 677  | ST-677 complex  | This study | SRR5123347 |
| 4888 | IFR0116 | environment | environmental waters | France | 2013 | ST 2162 | -               | This study | SRR5123489 |
| 4889 | IFR0124 | environment | environmental waters | France | 2013 | ST 177  | ST-177 complex  | This study | SRR5123499 |
| 4890 | IFR0152 | environment | environmental waters | France | 2013 | ST 45   | ST-45 complex   | This study | SRR5123482 |
| 4891 | IFR0156 | environment | environmental waters | France | 2013 | ST 5845 | -               | This study | SRR5123368 |
| 4892 | IFR0179 | environment | environmental waters | France | 2013 | ST 45   | ST-45 complex   | This study | SRR5123473 |
| 4893 | IFR0186 | environment | environmental waters | France | 2013 | -       | -               | This study | SRR5123302 |
| 4894 | IFR0198 | environment | environmental waters | France | 2013 | -       | -               | This study | SRR5123412 |
| 4895 | IFR0234 | environment | environmental waters | France | 2013 | ST 677  | ST-677 complex  | This study | SRR5123438 |
| 4896 | IFR0245 | environment | environmental waters | France | 2013 | ST 5101 | -               | This study | SRR5123381 |
| 4897 | IFR0254 | environment | environmental waters | France | 2013 | ST 3501 | ST-952 complex  | This study | SRR5123311 |
| 4898 | IFR0279 | environment | environmental waters | France | 2013 | ST 6788 | ST-1332 complex | This study | SRR5123361 |
| 4899 | IFR0337 | environment | environmental waters | France | 2013 | ST 1347 | ST-1347 complex | This study | SRR5123327 |

|      |         |             |                      |        |      |         |                |            |            |
|------|---------|-------------|----------------------|--------|------|---------|----------------|------------|------------|
| 4900 | IFR0340 | environment | environmental waters | France | 2013 | ST 1409 | -              | This study | SRR5123349 |
| 4904 | IFR0455 | environment | environmental waters | France | 2013 | -       | -              | This study | SRR5123480 |
| 4905 | IFR0457 | environment | sand (bathing beach) | France | 2013 | ST 2654 | -              | This study | SRR5123355 |
| 4906 | IFR0458 | environment | sand (bathing beach) | France | 2013 | ST 2654 | -              | This study | SRR5123340 |
| 4907 | IFR0459 | environment | sand (bathing beach) | France | 2013 | ST 2654 | -              | This study | SRR5123325 |
| 4908 | IFR0585 | environment | environmental waters | France | 2014 | ST 3218 | -              | This study | SRR5123420 |
| 4909 | IFR0589 | environment | environmental waters | France | 2014 | ST 3923 | -              | This study | SRR5123346 |
| 4910 | IFR0620 | environment | environmental waters | France | 2014 | -       | -              | This study | SRR5123484 |
| 4911 | IFR0621 | environment | environmental waters | France | 2014 | -       | -              | This study | SRR5123490 |
| 4913 | IFR0800 | environment | environmental waters | France | 2014 | ST 583  | ST-45 complex  | This study | SRR5123403 |
| 4914 | IFR0830 | environment | environmental waters | France | 2014 | ST 177  | ST-177 complex | This study | SRR5123485 |
| 4916 | IFR0839 | environment | mussel               | France | 2014 | ST 1959 | -              | This study | SRR5123312 |
| 4917 | IFR0841 | environment | mussel               | France | 2014 | ST 1959 | -              | This study | SRR5123414 |
| 4918 | IFR0842 | environment | mussel               | France | 2014 | ST 1959 | -              | This study | SRR5123452 |
| 4919 | IFR0870 | environment | environmental waters | France | 2014 | ST 267  | ST-283 complex | This study | SRR5123470 |
| 4920 | IFR0873 | environment | environmental waters | France | 2014 | -       | -              | This study | SRR5123431 |
| 4921 | IFR0949 | environment | environmental waters | France | 2014 | ST 5707 | -              | This study | SRR5123359 |
| 4923 | IFR1011 | environment | environmental waters | France | 2014 | ST 45   | ST-45 complex  | This study | SRR5123385 |

|      |         |             |                         |        |      |         |                  |            |            |
|------|---------|-------------|-------------------------|--------|------|---------|------------------|------------|------------|
| 4924 | IFR1020 | environment | environmental<br>waters | France | 2014 | -       | -                | This study | SRR5123439 |
| 4925 | IFR1108 | environment | environmental<br>waters | France | 2014 | ST 448  | -                | This study | SRR5123305 |
| 4926 | IFR1152 | environment | environmental<br>waters | France | 2014 | ST 1286 | -                | This study | SRR5123372 |
| 4927 | IFR1162 | environment | environmental<br>waters | France | 2014 | ST 2654 | -                | This study | SRR5123398 |
| 4928 | IFR1166 | environment | environmental<br>waters | France | 2014 | ST 2654 | -                | This study | SRR5123429 |
| 4929 | IFR1223 | environment | environmental<br>waters | France | 2014 | ST 6076 | ST-45<br>complex | This study | SRR5123343 |
| 4931 | IFR1237 | environment | environmental<br>waters | France | 2014 | ST 5053 | -                | This study | SRR5123406 |
| 4932 | IFR1268 | environment | environmental<br>waters | France | 2015 | ST 1316 | -                | This study | SRR5123339 |

a. Sequence types determined using the built-in MLST function of BIGSdb, linked with pubMLST databases. Lack of information denotes the possible truncation of a corresponding MLST locus at the end of a contig.

b. Clonal complex determined using the built-in MLST function of BIGSdb, linked with pubMLST databases. Lack of information denotes the possible truncation of a corresponding MLST locus at the end of a contig.



**Table S2. Details of the 212 *Campylobacter jejuni* genomes sequenced in the study**

| Identifier | Strain name | Origin                | Assembler used | Total length (bp) | Contigs |             |             |
|------------|-------------|-----------------------|----------------|-------------------|---------|-------------|-------------|
|            |             |                       |                |                   | Number  | Max. length | Mean length |
| 4713       | AC0264      | chicken caecal sample | mira           | 1659041           | 33      | 272066      | 50274       |
| 4714       | AC0281      | chicken carcass swab  | mira           | 1658623           | 31      | 218326      | 53504       |
| 4715       | AC0302      | chicken caecal sample | mira           | 1708711           | 43      | 155324      | 39738       |
| 4716       | AC0400      | chicken carcass swab  | spades         | 1613836           | 33      | 325975      | 48905       |
| 4717       | AC0465      | chicken carcass swab  | mira           | 1609517           | 46      | 133408      | 34990       |
| 4718       | AC0473      | chicken carcass swab  | spades         | 1687124           | 73      | 140225      | 23112       |
| 4719       | AC0559      | chicken caecal sample | mira           | 1680321           | 52      | 160058      | 32314       |
| 4720       | AC0568      | chicken carcass swab  | spades         | 1661457           | 78      | 162946      | 21301       |
| 4721       | AC0691      | chicken carcass swab  | mira           | 1632863           | 59      | 135989      | 27676       |
| 4722       | AC0745      | chicken carcass swab  | mira           | 1739167           | 256     | 496432      | 6794        |
| 4723       | AC0791      | chicken caecal sample | mira           | 1687432           | 47      | 146098      | 35903       |
| 4724       | AC0927      | chicken carcass swab  | mira           | 1824644           | 105     | 165940      | 17378       |

|      |        |                          |        |         |     |        |       |
|------|--------|--------------------------|--------|---------|-----|--------|-------|
| 4725 | AC0994 | chicken carcass<br>swab  | spades | 1702265 | 62  | 153702 | 27456 |
| 4726 | AC1136 | chicken carcass<br>swab  | mira   | 1659757 | 33  | 341522 | 50296 |
| 4727 | AC1151 | chicken carcass<br>swab  | mira   | 1691809 | 35  | 212177 | 48338 |
| 4728 | AC1363 | chicken carcass<br>swab  | mira   | 1710993 | 25  | 390183 | 68440 |
| 4729 | AC1474 | chicken carcass<br>swab  | mira   | 1733621 | 312 | 223745 | 5557  |
| 4730 | AC1476 | chicken carcass<br>swab  | spades | 1651196 | 61  | 139873 | 27069 |
| 4731 | AC2327 | chicken carcass<br>swab  | mira   | 1654077 | 60  | 174367 | 27568 |
| 4732 | AC2811 | chicken caecal<br>sample | spades | 1700937 | 74  | 193687 | 22986 |
| 4733 | AC2823 | chicken carcass<br>swab  | mira   | 1656286 | 51  | 118831 | 32477 |
| 4734 | AC3107 | chicken caecal<br>sample | spades | 1654114 | 51  | 342751 | 32434 |
| 4735 | AC3201 | chicken caecal<br>sample | spades | 1664084 | 82  | 103943 | 20294 |
| 4736 | AC3497 | chicken caecal<br>sample | mira   | 1658541 | 66  | 133757 | 25130 |
| 4737 | AC3940 | chicken carcass<br>swab  | mira   | 1721782 | 56  | 125647 | 30747 |
| 4738 | AC4322 | chicken caecal<br>sample | mira   | 1747849 | 79  | 138378 | 22125 |
| 4739 | AC4401 | chicken carcass<br>swab  | mira   | 1684571 | 53  | 136406 | 31785 |

|      |        |                       |        |         |     |        |       |
|------|--------|-----------------------|--------|---------|-----|--------|-------|
| 4740 | AC4520 | chicken carcass swab  | spades | 1643378 | 319 | 28806  | 5152  |
| 4741 | AC4896 | chicken carcass swab  | spades | 1652363 | 151 | 80513  | 10943 |
| 4742 | C0113  | chicken offal or meat | mira   | 1612413 | 87  | 72657  | 18534 |
| 4743 | C0118  | chicken offal or meat | mira   | 1814140 | 135 | 89014  | 13439 |
| 4744 | C0185  | chicken offal or meat | mira   | 1726094 | 42  | 194220 | 41098 |
| 4745 | C0191  | chicken offal or meat | mira   | 1766863 | 81  | 101297 | 21814 |
| 4746 | C0230  | chicken offal or meat | mira   | 1692448 | 55  | 447418 | 30772 |
| 4747 | C0274  | chicken offal or meat | mira   | 1654800 | 107 | 191423 | 15466 |
| 4748 | C0276  | chicken offal or meat | mira   | 1661133 | 38  | 211479 | 43715 |
| 4749 | C0303  | chicken offal or meat | spades | 1638821 | 65  | 105703 | 25213 |
| 4750 | C0402  | chicken offal or meat | mira   | 1689777 | 89  | 280978 | 18987 |
| 4751 | C0519  | chicken offal or meat | mira   | 1728037 | 115 | 108845 | 15027 |
| 4752 | C0531  | chicken offal or      | mira   | 1704822 | 49  | 107435 | 34793 |
| 4753 | C0743  | chicken offal or meat | mira   | 1691598 | 50  | 156648 | 33832 |
| 4754 | C0757  | chicken offal or meat | mira   | 1758282 | 89  | 86207  | 19756 |
| 4755 | C0784  | chicken offal or meat | spades | 1664186 | 89  | 90057  | 18699 |

|      |       |                          |      |         |     |        |       |
|------|-------|--------------------------|------|---------|-----|--------|-------|
| 4756 | C0848 | chicken offal or<br>meat | mira | 1601808 | 29  | 206467 | 55235 |
| 4757 | C1055 | chicken offal or<br>meat | mira | 1604923 | 34  | 128650 | 47204 |
| 4758 | C1061 | chicken offal or<br>meat | mira | 1621098 | 37  | 315009 | 43814 |
| 4759 | C1141 | chicken offal or<br>meat | mira | 1627507 | 87  | 203903 | 18707 |
| 4760 | C1251 | chicken offal or<br>meat | mira | 1740716 | 85  | 114993 | 20480 |
| 4761 | C1267 | chicken offal or<br>meat | mira | 1712634 | 79  | 128942 | 21679 |
| 4762 | C1387 | chicken offal or<br>meat | mira | 1811687 | 82  | 97459  | 22094 |
| 4763 | C1516 | chicken offal or<br>meat | mira | 1657895 | 49  | 165772 | 33835 |
| 4764 | C1656 | chicken offal or<br>meat | mira | 1735651 | 47  | 185526 | 36929 |
| 4765 | C1658 | chicken offal or<br>meat | mira | 1795737 | 87  | 171925 | 20641 |
| 4767 | C1863 | chicken offal or<br>meat | mira | 1681655 | 31  | 281427 | 54247 |
| 4768 | C1871 | chicken offal or<br>meat | mira | 1663035 | 43  | 131934 | 38676 |
| 4769 | C2094 | chicken offal or<br>meat | mira | 1732572 | 50  | 102608 | 34652 |
| 4770 | C2122 | chicken offal or<br>meat | mira | 1826719 | 395 | 433739 | 4625  |
| 4771 | C2228 | chicken offal or<br>meat | mira | 1769975 | 52  | 208713 | 34038 |

|      |             |                          |        |         |     |        |       |
|------|-------------|--------------------------|--------|---------|-----|--------|-------|
| 4772 | C2234       | chicken offal or<br>meat | mira   | 1713672 | 39  | 311406 | 43941 |
| 4773 | C2240       | chicken offal or<br>meat | mira   | 1645799 | 39  | 172957 | 42200 |
| 4774 | C2244       | chicken offal or<br>meat | mira   | 1686917 | 100 | 102423 | 16870 |
| 4775 | C2257       | chicken offal or<br>meat | mira   | 1724158 | 53  | 148477 | 32532 |
| 4776 | C97anses640 | chicken carcass<br>swab  | mira   | 1607255 | 30  | 202841 | 53576 |
| 4777 | CB0004      | cattle                   | mira   | 1611541 | 67  | 154475 | 24053 |
| 4778 | CB0011      | cattle                   | mira   | 1658487 | 36  | 169465 | 46070 |
| 4779 | CB0012      | cattle                   | mira   | 1664407 | 41  | 248316 | 40596 |
| 4780 | CB0013      | cattle                   | mira   | 1648247 | 39  | 263847 | 42263 |
| 4781 | CB0023      | cattle                   | mira   | 1696844 | 46  | 222613 | 36888 |
| 4782 | CB0030      | cattle                   | mira   | 1666795 | 36  | 322513 | 46300 |
| 4783 | CB0031      | cattle                   | mira   | 1643303 | 37  | 186678 | 44414 |
| 4784 | CB0061      | cattle                   | mira   | 1647614 | 40  | 221817 | 41191 |
| 4785 | CB0072      | cattle                   | mira   | 1657061 | 33  | 381277 | 50214 |
| 4786 | CB0084      | cattle                   | spades | 1650813 | 68  | 154491 | 24277 |
| 4787 | CB0089      | cattle                   | mira   | 1771382 | 90  | 124213 | 19683 |
| 4788 | CB0091      | cattle                   | spades | 1636044 | 42  | 270853 | 38954 |
| 4789 | CB0096      | cattle                   | mira   | 1665433 | 86  | 91920  | 19366 |
| 4790 | CTA007      | dog                      | spades | 1736178 | 83  | 117340 | 20918 |
| 4791 | CTA011      | cat                      | spades | 1682021 | 36  | 219854 | 46723 |
| 4792 | CTA023      | dog                      | mira   | 1770062 | 214 | 265943 | 8272  |
| 4793 | CTA025      | dog                      | mira   | 1795118 | 297 | 206063 | 6045  |
| 4794 | CTA029      | dog                      | mira   | 1837597 | 432 | 408355 | 4254  |
| 4795 | CTA035      | cat                      | spades | 1680904 | 55  | 109470 | 30562 |
| 4796 | CTA040      | cat                      | mira   | 1800116 | 423 | 247413 | 4256  |
| 4797 | CTA043      | dog                      | spades | 1609463 | 60  | 120524 | 26825 |

|      |        |     |        |         |     |        |       |
|------|--------|-----|--------|---------|-----|--------|-------|
| 4798 | CTA057 | dog | spades | 1773378 | 79  | 162140 | 22448 |
| 4799 | CTA075 | dog | spades | 1780455 | 404 | 230367 | 4408  |
| 4800 | CTA082 | dog | spades | 1686740 | 62  | 111556 | 27206 |
| 4801 | CTA093 | dog | mira   | 1717064 | 64  | 140833 | 26830 |
| 4802 | CTA110 | dog | spades | 1689913 | 50  | 144933 | 33799 |
| 4803 | CTA179 | dog | spades | 1600727 | 54  | 204938 | 29644 |
| 4804 | CTA186 | cat | spades | 1684012 | 66  | 109491 | 25516 |
| 4805 | CTA201 | dog | spades | 1734175 | 80  | 112206 | 21678 |
| 4806 | CTA215 | dog | spades | 1646374 | 44  | 189253 | 37418 |
| 4807 | CTA230 | dog | spades | 1699813 | 427 | 210008 | 3981  |
| 4808 | CTA242 | dog | spades | 1683811 | 37  | 162713 | 45509 |
| 4809 | CTA244 | dog | spades | 1611614 | 48  | 238569 | 33576 |
| 4810 | CTA247 | dog | spades | 1899943 | 459 | 336336 | 4140  |
| 4811 | CTA277 | dog | spades | 1617013 | 84  | 136695 | 19251 |
| 4812 | CTA282 | dog | mira   | 1674743 | 306 | 204791 | 5474  |
| 4813 | CTA286 | dog | mira   | 1720475 | 449 | 341014 | 3832  |
| 4814 | CTA295 | dog | spades | 1799280 | 465 | 191467 | 3870  |
| 4815 | CTA306 | dog | spades | 1773906 | 345 | 290540 | 5142  |
| 4816 | CTA321 | dog | spades | 1717780 | 55  | 179148 | 31233 |
| 4817 | CTA331 | dog | mira   | 1692237 | 358 | 342872 | 4727  |
| 4818 | CTA415 | dog | mira   | 1862316 | 449 | 197115 | 4148  |
| 4819 | CTA417 | dog | mira   | 1790524 | 438 | 352188 | 4088  |
| 4820 | CTA430 | dog | spades | 1796907 | 438 | 320965 | 4103  |
| 4821 | CTA468 | dog | mira   | 1729553 | 465 | 675769 | 3720  |
| 4822 | CTA473 | dog | mira   | 1834868 | 545 | 306255 | 3367  |
| 4823 | CTA483 | dog | spades | 1869359 | 542 | 184156 | 3450  |
| 4824 | CTA503 | dog | mira   | 1875113 | 486 | 347823 | 3859  |
| 4825 | CTA526 | cat | spades | 1731065 | 48  | 205325 | 36064 |
| 4826 | CTA560 | dog | mira   | 1749828 | 404 | 338084 | 4332  |
| 4827 | CTA592 | dog | mira   | 1817230 | 406 | 252098 | 4476  |
| 4828 | CTA595 | dog | mira   | 1774667 | 84  | 159355 | 21127 |

|      |          |                          |        |         |     |        |       |
|------|----------|--------------------------|--------|---------|-----|--------|-------|
| 4829 | CTA628   | dog                      | mira   | 1740737 | 96  | 83494  | 18133 |
| 4830 | CTA666   | dog                      | mira   | 1737866 | 121 | 109281 | 14363 |
| 4831 | CTA675   | dog                      | mira   | 1741992 | 182 | 86138  | 9572  |
| 4832 | CTA693   | dog                      | mira   | 1726211 | 95  | 145733 | 18171 |
| 4833 | CTA702   | dog                      | mira   | 1735167 | 115 | 83704  | 15089 |
| 4834 | CTA710   | dog                      | spades | 1658303 | 49  | 155937 | 33843 |
| 4835 | CTA735   | dog                      | mira   | 1866616 | 401 | 215670 | 4655  |
| 4836 | CTA736   | dog                      | mira   | 1758996 | 246 | 503409 | 7151  |
| 4837 | CTA738   | dog                      | mira   | 1770374 | 288 | 503809 | 6148  |
| 4838 | CTA780   | dog                      | mira   | 1612776 | 61  | 142515 | 26439 |
| 4839 | CTA789   | dog                      | mira   | 1868618 | 403 | 214690 | 4637  |
| 4840 | CTA792   | dog                      | mira   | 1764982 | 357 | 100159 | 4944  |
| 4841 | CTA801   | cat                      | mira   | 1661801 | 304 | 160441 | 5467  |
| 4842 | CTA806   | cat                      | mira   | 1654536 | 268 | 165911 | 6174  |
| 4843 | CTA848   | dog                      | mira   | 1776805 | 276 | 419194 | 6438  |
| 4844 | CTA855   | dog                      | mira   | 1892670 | 398 | 302163 | 4756  |
| 4845 | ECR105.1 | chicken caecal<br>sample | spades | 1695593 | 98  | 120482 | 17302 |
| 4846 | ECR150.1 | chicken caecal<br>sample | mira   | 1798166 | 55  | 175189 | 32694 |
| 4847 | H0026    | human unspecified        | spades | 1712064 | 78  | 79463  | 21950 |
| 4848 | H0035    | human unspecified        | mira   | 1708151 | 67  | 130388 | 25495 |
| 4849 | H0044    | human unspecified        | mira   | 1645365 | 84  | 121847 | 19588 |
| 4850 | H0058    | human unspecified        | mira   | 1708008 | 44  | 220088 | 38819 |
| 4851 | H0065    | human unspecified        | mira   | 1657192 | 43  | 228855 | 38540 |
| 4852 | H0070    | human unspecified        | mira   | 1663863 | 33  | 469415 | 50421 |
| 4853 | H0079    | human unspecified        | mira   | 1706701 | 38  | 255376 | 44914 |
| 4854 | H0094    | human unspecified        | mira   | 1643034 | 77  | 128651 | 21339 |
| 4855 | H0097    | human unspecified        | mira   | 1702984 | 35  | 244256 | 48657 |
| 4856 | H0148    | human unspecified        | mira   | 1774598 | 58  | 161522 | 30597 |
| 4857 | H0149    | human unspecified        | spades | 1703729 | 52  | 180118 | 32765 |

|      |         |                         |        |         |     |        |       |
|------|---------|-------------------------|--------|---------|-----|--------|-------|
| 4858 | H0198   | human unspecified       | mira   | 1755888 | 78  | 99549  | 22512 |
| 4859 | H0232   | human unspecified       | mira   | 1677559 | 26  | 453233 | 64522 |
| 4860 | H0234   | human unspecified       | mira   | 1679187 | 46  | 199913 | 36505 |
| 4861 | H0253   | human unspecified       | spades | 1768520 | 427 | 205620 | 4142  |
| 4862 | H0271   | human unspecified       | spades | 1636906 | 52  | 136184 | 31479 |
| 4863 | H0296   | human unspecified       | mira   | 1711112 | 79  | 87794  | 21660 |
| 4864 | H0357   | human unspecified       | mira   | 1654469 | 33  | 227603 | 50136 |
| 4865 | H0436   | human unspecified       | spades | 1695668 | 38  | 246119 | 44623 |
| 4866 | H0450   | human unspecified       | mira   | 1655579 | 46  | 266491 | 35991 |
| 4867 | H0465   | human unspecified       | mira   | 1707647 | 39  | 380017 | 43786 |
| 4868 | H0483   | human unspecified       | mira   | 1673049 | 50  | 154664 | 33461 |
| 4869 | H0544   | human unspecified       | mira   | 1752499 | 70  | 129534 | 25036 |
| 4870 | H0553   | human unspecified       | mira   | 1929060 | 126 | 133223 | 15310 |
| 4871 | H0604   | human unspecified       | mira   | 1753196 | 60  | 170507 | 29220 |
| 4872 | H0624   | human unspecified       | mira   | 1717807 | 66  | 98429  | 26028 |
| 4873 | H0642   | human unspecified       | mira   | 1661406 | 73  | 80351  | 22759 |
| 4874 | H0677   | human unspecified       | mira   | 1718838 | 45  | 146650 | 38197 |
| 4875 | H0679   | human unspecified       | mira   | 1708025 | 75  | 150702 | 22774 |
| 4876 | H0701   | human unspecified       | spades | 1628207 | 22  | 600393 | 74010 |
| 4877 | H0702   | human unspecified       | mira   | 1744098 | 74  | 248833 | 23569 |
| 4878 | H0711   | human unspecified       | mira   | 1753021 | 49  | 199557 | 35776 |
| 4879 | H0712   | human unspecified       | mira   | 1749686 | 63  | 173716 | 27773 |
| 4880 | H0783   | human unspecified       | mira   | 1692278 | 64  | 174958 | 26442 |
| 4881 | H0864   | human unspecified       | mira   | 1677872 | 31  | 273722 | 54125 |
| 4882 | H0998   | human unspecified       | mira   | 1772116 | 71  | 195816 | 24960 |
| 4883 | H1003   | human unspecified       | mira   | 1659260 | 56  | 94582  | 29630 |
| 4884 | H1460   | human unspecified       | mira   | 1712075 | 65  | 195814 | 26340 |
| 4885 | H1911   | human unspecified       | spades | 1780009 | 313 | 194041 | 5687  |
| 4886 | H2696   | human unspecified       | mira   | 1688748 | 53  | 98118  | 31864 |
| 4887 | IFR0079 | environmental<br>waters | mira   | 1710142 | 345 | 187363 | 4957  |



|      |         |                      |      |         |     |        |       |
|------|---------|----------------------|------|---------|-----|--------|-------|
| 4888 | IFR0116 | environmental waters | mira | 1658583 | 309 | 380921 | 5368  |
| 4889 | IFR0124 | environmental waters | mira | 1705663 | 308 | 344951 | 5538  |
| 4890 | IFR0152 | environmental waters | mira | 1612012 | 124 | 79025  | 13001 |
| 4891 | IFR0156 | environmental waters | mira | 1812314 | 248 | 198166 | 7308  |
| 4892 | IFR0179 | environmental waters | mira | 1649458 | 182 | 181414 | 9063  |
| 4893 | IFR0186 | environmental waters | mira | 1850704 | 65  | 130990 | 28473 |
| 4894 | IFR0198 | environmental waters | mira | 1635844 | 58  | 136717 | 28205 |
| 4895 | IFR0234 | environmental waters | mira | 1691313 | 268 | 316590 | 6311  |
| 4896 | IFR0245 | environmental waters | mira | 1830634 | 257 | 133022 | 7124  |
| 4897 | IFR0254 | environmental waters | mira | 2016840 | 294 | 97623  | 6860  |
| 4898 | IFR0279 | environmental waters | mira | 1580331 | 141 | 55998  | 11209 |
| 4899 | IFR0337 | environmental waters | mira | 1847260 | 477 | 395480 | 3873  |
| 4900 | IFR0340 | environmental waters | mira | 1687324 | 136 | 398192 | 12407 |
| 4904 | IFR0455 | environmental waters | mira | 1683993 | 54  | 157018 | 31186 |
| 4905 | IFR0457 | sand (bathing beach) | mira | 1656624 | 163 | 174282 | 10164 |

|      |         |                      |      |         |     |        |       |
|------|---------|----------------------|------|---------|-----|--------|-------|
| 4906 | IFR0458 | sand (bathing beach) | mira | 1631347 | 54  | 140184 | 30211 |
| 4907 | IFR0459 | sand (bathing beach) | mira | 1629447 | 67  | 120538 | 24321 |
| 4908 | IFR0585 | environmental waters | mira | 1846699 | 279 | 146375 | 6619  |
| 4909 | IFR0589 | environmental waters | mira | 1589482 | 120 | 73183  | 13246 |
| 4910 | IFR0620 | environmental waters | mira | 1802740 | 140 | 92611  | 12877 |
| 4911 | IFR0621 | environmental waters | mira | 1906236 | 413 | 72852  | 4616  |
| 4913 | IFR0800 | environmental waters | mira | 1780008 | 275 | 148929 | 6473  |
| 4914 | IFR0830 | environmental waters | mira | 1605469 | 81  | 114818 | 19821 |
| 4916 | IFR0839 | mussel               | mira | 1730662 | 298 | 148929 | 5808  |
| 4917 | IFR0841 | mussel               | mira | 1689980 | 171 | 350888 | 9883  |
| 4918 | IFR0842 | mussel               | mira | 1738522 | 282 | 226445 | 6165  |
| 4919 | IFR0870 | environmental waters | mira | 1600662 | 49  | 170590 | 32667 |
| 4920 | IFR0873 | environmental waters | mira | 1768502 | 48  | 243576 | 36844 |
| 4921 | IFR0949 | environmental waters | mira | 1645520 | 71  | 132310 | 23177 |
| 4923 | IFR1011 | environmental waters | mira | 1661897 | 58  | 269047 | 28654 |
| 4924 | IFR1020 | environmental waters | mira | 1620416 | 96  | 338938 | 16880 |
| 4925 | IFR1108 | environmental waters | mira | 1767295 | 136 | 241189 | 12995 |

|      |         |                         |      |         |    |        |       |
|------|---------|-------------------------|------|---------|----|--------|-------|
| 4926 | IFR1152 | environmental<br>waters | mira | 1591380 | 52 | 480815 | 30604 |
| 4927 | IFR1162 | environmental<br>waters | mira | 1633292 | 53 | 170064 | 30817 |
| 4928 | IFR1166 | environmental<br>waters | mira | 1627686 | 45 | 172045 | 36171 |
| 4929 | IFR1223 | environmental<br>waters | mira | 1713015 | 77 | 114742 | 22247 |
| 4931 | IFR1237 | environmental<br>waters | mira | 1625274 | 70 | 83156  | 23219 |
| 4932 | IFR1268 | environmental<br>waters | mira | 1551524 | 43 | 196624 | 36082 |

**Table S3. Number of alleles at each locus of our pan-genome of *C. jejuni***

| Locus       | Number of alleles | Locus       | Number of alleles | Locus       | Number of alleles | Locus         | Number of alleles |
|-------------|-------------------|-------------|-------------------|-------------|-------------------|---------------|-------------------|
| 11168_aas   | 258               | 11168_argS  | 184               | 11168_carB  | 210               | 11168_cheV    | 68                |
| 11168_aat   | 63                | 11168_aroA  | 112               | 11168_cbpA  | 113               | 11168_cheW    | 37                |
| 11168_accA  | 92                | 11168_aroB  | 105               | 11168_cbrR  | 121               | 11168_cheY    | 26                |
| 11168_accB  | 62                | 11168_aroC  | 112               | 11168_cca   | 118               | 11168_chuA    | 211               |
| 11168_accC  | 116               | 11168_aroE  | 97                | 11168_ccoN  | 91                | 11168_chuB    | 138               |
| 11168_accD  | 87                | 11168_aroK  | 85                | 11168_ccoO  | 53                | 11168_chuC    | 94                |
| 11168_ackA  | 178               | 11168_aroQ  | 58                | 11168_ccoP  | 70                | 11168_chuD    | 87                |
| 11168_acnB  | 156               | 11168_arsB  | 183               | 11168_ccoQ  | 29                | 11168_ciaB    | 162               |
| 11168_acpP  | 18                | 11168_asd   | 124               | 11168_cdsA  | 142               | 11168_cipA    | 233               |
| 11168_acpP2 | 41                | 11168_aspA  | 120               | 11168_cdtA  | 99                | 11168_Cj0004c | 55                |
| 11168_acpP3 | 48                | 11168_aspB  | 134               | 11168_cdtB  | 81                | 11168_Cj0005c | 156               |
| 11168_acpS  | 78                | 11168_aspS  | 165               | 11168_cdtC  | 79                | 11168_Cj0006  | 155               |
| 11168_acs   | 181               | 11168_atpA  | 85                | 11168_cetA  | 230               | 11168_Cj0008  | 27                |
| 11168_adk   | 95                | 11168_atpB  | 75                | 11168_cetB  | 99                | 11168_Cj0011c | 43                |
| 11168_ahpC  | 65                | 11168_atpC  | 38                | 11168_ceuB  | 181               | 11168_Cj0014c | 54                |
| 11168_alaS  | 168               | 11168_atpD  | 82                | 11168_ceuC  | 126               | 11168_Cj0015c | 145               |
| 11168_ald'  | 56                | 11168_atpE  | 48                | 11168_ceuD  | 94                | 11168_Cj0016  | 97                |
| 11168_ald'2 | 26                | 11168_atpF  | 66                | 11168_ceuE  | 139               | 11168_Cj0019c | 269               |
| 11168_alr   | 116               | 11168_atpF' | 52                | 11168_cfa   | 101               | 11168_Cj0020c | 162               |
| 11168_amaA  | 106               | 11168_atpG  | 68                | 11168_cfbpA | 109               | 11168_Cj0021c | 146               |
| 11168_amiA  | 221               | 11168_atpH  | 60                | 11168_cfbpB | 152               | 11168_Cj0022c | 148               |
| 11168_ansA  | 123               | 11168_bioA  | 129               | 11168_cfbpC | 97                | 11168_Cj0025c | 177               |
| 11168_apt   | 84                | 11168_bioB  | 100               | 11168_cfrA  | 123               | 11168_Cj0030  | 178               |
| 11168_argB  | 95                | 11168_bioC  | 74                | 11168_cft   | 59                | 11168_Cj0031  | 430               |
| 11168_argC  | 99                | 11168_bioD  | 78                | 11168_cgb   | 79                | 11168_Cj0033  | 53                |
| 11168_argD  | 115               | 11168_bioF  | 111               | 11168_cgpa  | 78                | 11168_Cj0034c | 182               |
| 11168_argF  | 120               | 11168_birA  | 92                | 11168_cheA  | 148               | 11168_Cj0035c | 239               |
| 11168_argG  | 132               | 11168_cadF  | 90                | 11168_cheB' | 64                | 11168_Cj0036  | 226               |
| 11168_argH  | 139               | 11168_carA  | 92                | 11168_cheR  | 111               | 11168_Cj0037c | 183               |

| Locus         | Number of alleles |
|---------------|-------------------|---------------|-------------------|---------------|-------------------|---------------|-------------------|
| 11168_Cj0038c | 137               | 11168_Cj0122  | 40                | 11168_Cj0168c | 51                | 11168_Cj0247c | 91                |
| 11168_Cj0040  | 52                | 11168_Cj0123c | 136               | 11168_Cj0170  | 71                | 11168_Cj0248  | 101               |
| 11168_Cj0044c | 305               | 11168_Cj0124c | 110               | 11168_Cj0172c | 106               | 11168_Cj0249  | 70                |
| 11168_Cj0045c | 252               | 11168_Cj0125c | 64                | 11168_Cj0176c | 38                | 11168_Cj0250c | 138               |
| 11168_Cj0054c | 81                | 11168_Cj0126c | 63                | 11168_Cj0177  | 74                | 11168_Cj0251c | 34                |
| 11168_Cj0055c | 58                | 11168_Cj0128c | 105               | 11168_Cj0178  | 95                | 11168_Cj0253  | 38                |
| 11168_Cj0056c | 20                | 11168_Cj0129c | 146               | 11168_Cj0182  | 121               | 11168_Cj0254  | 124               |
| 11168_Cj0057  | 121               | 11168_Cj0131  | 125               | 11168_Cj0183  | 132               | 11168_Cj0256  | 195               |
| 11168_Cj0058  | 96                | 11168_Cj0133  | 44                | 11168_Cj0184c | 136               | 11168_Cj0258  | 56                |
| 11168_Cj0062c | 20                | 11168_Cj0135  | 21                | 11168_Cj0185c | 46                | 11168_Cj0260c | 55                |
| 11168_Cj0063c | 92                | 11168_Cj0138  | 116               | 11168_Cj0186c | 87                | 11168_Cj0261c | 136               |
| 11168_Cj0067  | 136               | 11168_Cj0139  | 59                | 11168_Cj0188c | 135               | 11168_Cj0262c | 71                |
| 11168_Cj0069  | 144               | 11168_Cj0140  | 183               | 11168_Cj0189c | 81                | 11168_Cj0263  | 104               |
| 11168_Cj0070c | 44                | 11168_Cj0141c | 179               | 11168_Cj0190c | 143               | 11168_Cj0264c | 138               |
| 11168_Cj0073c | 76                | 11168_Cj0142c | 168               | 11168_Cj0198c | 115               | 11168_Cj0265c | 66                |
| 11168_Cj0074c | 123               | 11168_Cj0143c | 171               | 11168_Cj0199c | 97                | 11168_Cj0266c | 73                |
| 11168_Cj0075c | 79                | 11168_Cj0144  | 69                | 11168_Cj0200c | 42                | 11168_Cj0267c | 115               |
| 11168_Cj0080  | 36                | 11168_Cj0145  | 198               | 11168_Cj0201c | 69                | 11168_Cj0268c | 124               |
| 11168_Cj0085c | 99                | 11168_Cj0148c | 60                | 11168_Cj0202c | 53                | 11168_Cj0270  | 41                |
| 11168_Cj0089  | 143               | 11168_Cj0150c | 130               | 11168_Cj0203  | 153               | 11168_Cj0271  | 82                |
| 11168_Cj0090  | 65                | 11168_Cj0151c | 89                | 11168_Cj0204  | 183               | 11168_Cj0272  | 131               |
| 11168_Cj0091  | 79                | 11168_Cj0152c | 116               | 11168_Cj0208  | 117               | 11168_Cj0280  | 52                |
| 11168_Cj0092  | 133               | 11168_Cj0153c | 96                | 11168_Cj0225  | 70                | 11168_Cj0286c | 79                |
| 11168_Cj0093  | 154               | 11168_Cj0154c | 79                | 11168_Cj0229  | 78                | 11168_Cj0294  | 128               |
| 11168_Cj0100  | 91                | 11168_Cj0156c | 54                | 11168_Cj0230c | 106               | 11168_Cj0295  | 39                |
| 11168_Cj0101  | 82                | 11168_Cj0157c | 53                | 11168_Cj0232c | 47                | 11168_Cj0299  | 42                |
| 11168_Cj0111  | 95                | 11168_Cj0158c | 84                | 11168_Cj0236c | 99                | 11168_Cj0302c | 59                |
| 11168_Cj0114  | 108               | 11168_Cj0159c | 59                | 11168_Cj0238  | 135               | 11168_Cj0305c | 92                |
| 11168_Cj0118  | 85                | 11168_Cj0160c | 97                | 11168_Cj0239c | 77                | 11168_Cj0309c | 71                |
| 11168_Cj0119  | 61                | 11168_Cj0162c | 40                | 11168_Cj0241c | 62                | 11168_Cj0310c | 70                |
| 11168_Cj0120  | 85                | 11168_Cj0163c | 64                | 11168_Cj0243c | 116               | 11168_Cj0311  | 67                |
| 11168_Cj0121  | 63                | 11168_Cj0167c | 59                | 11168_Cj0246c | 57                | 11168_Cj0313  | 147               |

| Locus         | Number of alleles |
|---------------|-------------------|---------------|-------------------|---------------|-------------------|---------------|-------------------|
| 11168_Cj0315  | 105               | 11168_Cj0394c | 86                | 11168_Cj0448c | 96                | 11168_Cj0522  | 125               |
| 11168_Cj0323  | 160               | 11168_Cj0395c | 64                | 11168_Cj0449c | 20                | 11168_Cj0523  | 88                |
| 11168_Cj0327  | 61                | 11168_Cj0396c | 116               | 11168_Cj0454c | 84                | 11168_Cj0524  | 84                |
| 11168_Cj0331c | 68                | 11168_Cj0397c | 69                | 11168_Cj0455c | 43                | 11168_Cj0529c | 104               |
| 11168_Cj0339  | 127               | 11168_Cj0399  | 75                | 11168_Cj0456c | 109               | 11168_Cj0530  | 165               |
| 11168_Cj0340  | 103               | 11168_Cj0403  | 74                | 11168_Cj0457c | 71                | 11168_Cj0539  | 33                |
| 11168_Cj0341c | 87                | 11168_Cj0404  | 132               | 11168_Cj0459c | 20                | 11168_Cj0540  | 79                |
| 11168_Cj0343c | 90                | 11168_Cj0406c | 93                | 11168_Cj0461c | 116               | 11168_Cj0541  | 89                |
| 11168_Cj0344  | 27                | 11168_Cj0411  | 213               | 11168_Cj0462  | 99                | 11168_Cj0544  | 100               |
| 11168_Cj0350  | 47                | 11168_Cj0412  | 157               | 11168_Cj0463  | 151               | 11168_Cj0550  | 47                |
| 11168_Cj0352  | 110               | 11168_Cj0413  | 94                | 11168_Cj0467  | 89                | 11168_Cj0552  | 59                |
| 11168_Cj0353c | 135               | 11168_Cj0414  | 95                | 11168_Cj0468  | 88                | 11168_Cj0553  | 99                |
| 11168_Cj0355c | 53                | 11168_Cj0415  | 144               | 11168_Cj0469  | 86                | 11168_Cj0554  | 92                |
| 11168_Cj0357c | 60                | 11168_Cj0416  | 17                | 11168_Cj0480c | 75                | 11168_Cj0555  | 190               |
| 11168_Cj0358  | 89                | 11168_Cj0417  | 37                | 11168_Cj0484  | 75                | 11168_Cj0556  | 98                |
| 11168_Cj0362  | 67                | 11168_Cj0418c | 104               | 11168_Cj0485  | 34                | 11168_Cj0557c | 142               |
| 11168_Cj0363c | 115               | 11168_Cj0419  | 48                | 11168_Cj0486  | 71                | 11168_Cj0559  | 85                |
| 11168_Cj0364  | 31                | 11168_Cj0420  | 75                | 11168_Cj0487  | 41                | 11168_Cj0560  | 182               |
| 11168_Cj0369c | 170               | 11168_Cj0421c | 151               | 11168_Cj0488  | 36                | 11168_Cj0561c | 111               |
| 11168_Cj0371  | 85                | 11168_Cj0422c | 27                | 11168_Cj0494  | 25                | 11168_Cj0563  | 124               |
| 11168_Cj0372  | 113               | 11168_Cj0423  | 25                | 11168_Cj0495  | 114               | 11168_Cj0564  | 55                |
| 11168_Cj0373  | 107               | 11168_Cj0424  | 30                | 11168_Cj0496  | 53                | 11168_Cj0566  | 75                |
| 11168_Cj0374  | 76                | 11168_Cj0425  | 28                | 11168_Cj0497  | 128               | 11168_Cj0567  | 5                 |
| 11168_Cj0375  | 101               | 11168_Cj0426  | 149               | 11168_Cj0499  | 63                | 11168_Cj0568  | 18                |
| 11168_Cj0376  | 113               | 11168_Cj0427  | 52                | 11168_Cj0500  | 136               | 11168_Cj0569  | 47                |
| 11168_Cj0377  | 143               | 11168_Cj0428  | 58                | 11168_Cj0504c | 102               | 11168_Cj0570  | 130               |
| 11168_Cj0378c | 98                | 11168_Cj0429c | 98                | 11168_Cj0505c | 119               | 11168_Cj0571  | 117               |
| 11168_Cj0379c | 119               | 11168_Cj0430  | 212               | 11168_Cj0510c | 36                | 11168_Cj0573  | 56                |
| 11168_Cj0380c | 95                | 11168_Cj0431  | 89                | 11168_Cj0511  | 126               | 11168_Cj0579c | 49                |
| 11168_Cj0385c | 107               | 11168_Cj0436  | 105               | 11168_Cj0515  | 109               | 11168_Cj0580c | 126               |
| 11168_Cj0390  | 163               | 11168_Cj0440c | 82                | 11168_Cj0519  | 67                | 11168_Cj0581  | 81                |
| 11168_Cj0391c | 81                | 11168_Cj0447  | 71                | 11168_Cj0520  | 75                | 11168_Cj0583  | 116               |

| Locus         | Number of alleles |
|---------------|-------------------|---------------|-------------------|---------------|-------------------|---------------|-------------------|
| 11168_Cj0584  | 100               | 11168_Cj0645  | 105               | 11168_Cj0722c | 99                | 11168_Cj0791c | 165               |
| 11168_Cj0587  | 138               | 11168_Cj0646  | 105               | 11168_Cj0723c | 160               | 11168_Cj0792  | 126               |
| 11168_Cj0590  | 65                | 11168_Cj0647  | 88                | 11168_Cj0724  | 27                | 11168_Cj0794  | 98                |
| 11168_Cj0591c | 42                | 11168_Cj0648  | 65                | 11168_Cj0727  | 116               | 11168_Cj0796c | 105               |
| 11168_Cj0592c | 100               | 11168_Cj0649  | 58                | 11168_Cj0728  | 129               | 11168_Cj0797c | 59                |
| 11168_Cj0593c | 74                | 11168_Cj0651  | 117               | 11168_Cj0729  | 72                | 11168_Cj0800c | 181               |
| 11168_Cj0594c | 85                | 11168_Cj0653c | 168               | 11168_Cj0730  | 95                | 11168_Cj0801  | 206               |
| 11168_Cj0598  | 132               | 11168_Cj0659c | 91                | 11168_Cj0731  | 111               | 11168_Cj0805  | 120               |
| 11168_Cj0599  | 87                | 11168_Cj0660c | 133               | 11168_Cj0732  | 92                | 11168_Cj0807  | 91                |
| 11168_Cj0600  | 110               | 11168_Cj0667  | 47                | 11168_Cj0733  | 71                | 11168_Cj0808c | 96                |
| 11168_Cj0601c | 136               | 11168_Cj0668  | 57                | 11168_Cj0735  | 129               | 11168_Cj0809c | 73                |
| 11168_Cj0602c | 106               | 11168_Cj0669  | 75                | 11168_Cj0736  | 136               | 11168_Cj0814  | 205               |
| 11168_Cj0604  | 160               | 11168_Cj0672  | 61                | 11168_Cj0737  | 67                | 11168_Cj0815  | 93                |
| 11168_Cj0605  | 127               | 11168_Cj0681  | 26                | 11168_Cj0738  | 20                | 11168_Cj0816  | 38                |
| 11168_Cj0606  | 157               | 11168_Cj0682  | 36                | 11168_Cj0739  | 13                | 11168_Cj0818  | 28                |
| 11168_Cj0607  | 171               | 11168_Cj0683  | 62                | 11168_Cj0740  | 25                | 11168_Cj0819  | 9                 |
| 11168_Cj0608  | 146               | 11168_Cj0690c | 189               | 11168_Cj0741  | 133               | 11168_Cj0823  | 81                |
| 11168_Cj0609c | 177               | 11168_Cj0691  | 75                | 11168_Cj0747  | 22                | 11168_Cj0825  | 166               |
| 11168_Cj0610c | 131               | 11168_Cj0692c | 141               | 11168_Cj0748  | 25                | 11168_Cj0826  | 110               |
| 11168_Cj0611c | 158               | 11168_Cj0694  | 131               | 11168_Cj0760  | 133               | 11168_Cj0829c | 74                |
| 11168_Cj0617  | 90                | 11168_Cj0700  | 83                | 11168_Cj0761  | 62                | 11168_Cj0830  | 68                |
| 11168_Cj0618  | 40                | 11168_Cj0701  | 99                | 11168_Cj0768c | 85                | 11168_Cj0832c | 165               |
| 11168_Cj0619  | 197               | 11168_Cj0703  | 56                | 11168_Cj0770c | 100               | 11168_Cj0833c | 95                |
| 11168_Cj0620  | 149               | 11168_Cj0705  | 110               | 11168_Cj0771c | 112               | 11168_Cj0834c | 178               |
| 11168_Cj0621  | 181               | 11168_Cj0706  | 118               | 11168_Cj0772c | 87                | 11168_Cj0837c | 114               |
| 11168_Cj0628  | 142               | 11168_Cj0708  | 109               | 11168_Cj0773c | 112               | 11168_Cj0839c | 36                |
| 11168_Cj0630c | 202               | 11168_Cj0711  | 20                | 11168_Cj0774c | 122               | 11168_Cj0842  | 64                |
| 11168_Cj0631c | 224               | 11168_Cj0715  | 40                | 11168_Cj0776c | 145               | 11168_Cj0843c | 196               |
| 11168_Cj0633  | 154               | 11168_Cj0716  | 129               | 11168_Cj0777  | 192               | 11168_Cj0844c | 34                |
| 11168_Cj0635  | 64                | 11168_Cj0717  | 44                | 11168_Cj0786  | 31                | 11168_Cj0846  | 176               |
| 11168_Cj0636  | 160               | 11168_Cj0719c | 93                | 11168_Cj0787  | 35                | 11168_Cj0848c | 64                |
| 11168_Cj0644  | 124               | 11168_Cj0721c | 78                | 11168_Cj0788  | 52                | 11168_Cj0849c | 106               |

| Locus         | Number of alleles |
|---------------|-------------------|---------------|-------------------|---------------|-------------------|---------------|-------------------|
| 11168_Cj0850c | 137               | 11168_Cj0919c | 86                | 11168_Cj0974  | 43                | 11168_Cj1022c | 54                |
| 11168_Cj0851c | 117               | 11168_Cj0920c | 78                | 11168_Cj0975  | 159               | 11168_Cj1025c | 69                |
| 11168_Cj0852c | 70                | 11168_Cj0926  | 40                | 11168_Cj0976  | 100               | 11168_Cj1026c | 78                |
| 11168_Cj0854c | 59                | 11168_Cj0928  | 90                | 11168_Cj0977  | 70                | 11168_Cj1028c | 58                |
| 11168_Cj0859c | 28                | 11168_Cj0930  | 141               | 11168_Cj0978c | 28                | 11168_Cj1034c | 74                |
| 11168_Cj0860  | 57                | 11168_Cj0934c | 153               | 11168_Cj0979c | 97                | 11168_Cj1035c | 70                |
| 11168_Cj0864  | 58                | 11168_Cj0935c | 135               | 11168_Cj0980  | 131               | 11168_Cj1036c | 45                |
| 11168_Cj0873c | 53                | 11168_Cj0937  | 126               | 11168_Cj0983  | 126               | 11168_Cj1038  | 144               |
| 11168_Cj0874c | 119               | 11168_Cj0939c | 41                | 11168_Cj0984  | 123               | 11168_Cj1040c | 189               |
| 11168_Cj0876c | 76                | 11168_Cj0941c | 133               | 11168_Cj0986c | 28                | 11168_Cj1041c | 84                |
| 11168_Cj0877c | 16                | 11168_Cj0944c | 107               | 11168_Cj0987c | 155               | 11168_Cj1042c | 107               |
| 11168_Cj0878  | 32                | 11168_Cj0945c | 169               | 11168_Cj0988c | 108               | 11168_Cj1043c | 92                |
| 11168_Cj0879c | 112               | 11168_Cj0946  | 140               | 11168_Cj0989  | 49                | 11168_Cj1049c | 109               |
| 11168_Cj0880c | 48                | 11168_Cj0947c | 91                | 11168_Cj0990c | 103               | 11168_Cj1053c | 82                |
| 11168_Cj0881c | 81                | 11168_Cj0948c | 122               | 11168_Cj0991c | 150               | 11168_Cj1055c | 174               |
| 11168_Cj0883c | 61                | 11168_Cj0949c | 91                | 11168_Cj0993c | 74                | 11168_Cj1056c | 131               |
| 11168_Cj0888c | 210               | 11168_Cj0950c | 85                | 11168_Cj0997  | 84                | 11168_Cj1057c | 18                |
| 11168_Cj0889c | 185               | 11168_Cj0951c | 108               | 11168_Cj0998c | 75                | 11168_Cj1060c | 53                |
| 11168_Cj0890c | 69                | 11168_Cj0952c | 94                | 11168_Cj0999c | 117               | 11168_Cj1062  | 134               |
| 11168_Cj0892c | 56                | 11168_Cj0954c | 118               | 11168_Cj1000  | 106               | 11168_Cj1063  | 90                |
| 11168_Cj0898  | 57                | 11168_Cj0957c | 121               | 11168_Cj1002c | 88                | 11168_Cj1068  | 119               |
| 11168_Cj0900c | 53                | 11168_Cj0958c | 120               | 11168_Cj1003c | 122               | 11168_Cj1069  | 139               |
| 11168_Cj0901  | 105               | 11168_Cj0959c | 70                | 11168_Cj1004  | 64                | 11168_Cj1074c | 116               |
| 11168_Cj0903c | 138               | 11168_Cj0962  | 39                | 11168_Cj1005c | 160               | 11168_Cj1075  | 23                |
| 11168_Cj0904c | 66                | 11168_Cj0963  | 102               | 11168_Cj1006c | 129               | 11168_Cj1078  | 66                |
| 11168_Cj0906c | 84                | 11168_Cj0964  | 131               | 11168_Cj1007c | 134               | 11168_Cj1079  | 74                |
| 11168_Cj0908  | 102               | 11168_Cj0965c | 50                | 11168_Cj1009c | 123               | 11168_Cj1083c | 102               |
| 11168_Cj0909  | 59                | 11168_Cj0967  | 204               | 11168_Cj1011  | 126               | 11168_Cj1084c | 89                |
| 11168_Cj0910  | 62                | 11168_Cj0970  | 28                | 11168_Cj1012c | 109               | 11168_Cj1086c | 81                |
| 11168_Cj0911  | 61                | 11168_Cj0971  | 31                | 11168_Cj1013c | 169               | 11168_Cj1087c | 114               |
| 11168_Cj0915  | 40                | 11168_Cj0972  | 34                | 11168_Cj1020c | 40                | 11168_Cj1089c | 180               |
| 11168_Cj0916c | 30                | 11168_Cj0973  | 30                | 11168_Cj1021c | 96                | 11168_Cj1090c | 72                |



| Locus         | Number of alleles |
|---------------|-------------------|---------------|-------------------|---------------|-------------------|---------------|-------------------|
| 11168_Cj1095  | 150               | 11168_Cj1169c | 43                | 11168_Cj1241  | 133               | 11168_Cj1308  | 43                |
| 11168_Cj1097  | 149               | 11168_Cj1172c | 101               | 11168_Cj1242  | 122               | 11168_Cj1309c | 115               |
| 11168_Cj1099  | 149               | 11168_Cj1173  | 93                | 11168_Cj1244  | 118               | 11168_Cj1310c | 270               |
| 11168_Cj1100  | 50                | 11168_Cj1174  | 88                | 11168_Cj1245c | 143               | 11168_Cj1319  | 144               |
| 11168_Cj1101  | 192               | 11168_Cj1178c | 215               | 11168_Cj1247c | 79                | 11168_Cj1320  | 134               |
| 11168_Cj1104  | 120               | 11168_Cj1180c | 93                | 11168_Cj1249  | 162               | 11168_Cj1321  | 69                |
| 11168_Cj1106  | 77                | 11168_Cj1191c | 72                | 11168_Cj1251  | 60                | 11168_Cj1322  | 58                |
| 11168_Cj1110c | 159               | 11168_Cj1193c | 169               | 11168_Cj1252  | 189               | 11168_Cj1323  | 41                |
| 11168_Cj1111c | 64                | 11168_Cj1194  | 188               | 11168_Cj1254  | 95                | 11168_Cj1324  | 94                |
| 11168_Cj1112c | 54                | 11168_Cj1198  | 62                | 11168_Cj1255  | 25                | 11168_Cj1325  | 111               |
| 11168_Cj1113  | 113               | 11168_Cj1200  | 93                | 11168_Cj1256c | 106               | 11168_Cj1329  | 124               |
| 11168_Cj1115c | 96                | 11168_Cj1203c | 37                | 11168_Cj1257c | 209               | 11168_Cj1330  | 129               |
| 11168_Cj1122c | 27                | 11168_Cj1207c | 69                | 11168_Cj1258  | 135               | 11168_Cj1340c | 228               |
| 11168_Cj1132c | 142               | 11168_Cj1208  | 78                | 11168_Cj1270c | 102               | 11168_Cj1343c | 149               |
| 11168_Cj1135  | 126               | 11168_Cj1209  | 155               | 11168_Cj1275c | 151               | 11168_Cj1344c | 165               |
| 11168_Cj1136  | 52                | 11168_Cj1210  | 69                | 11168_Cj1276c | 91                | 11168_Cj1345c | 234               |
| 11168_Cj1137c | 16                | 11168_Cj1211  | 165               | 11168_Cj1277c | 53                | 11168_Cj1348c | 78                |
| 11168_Cj1138  | 23                | 11168_Cj1214c | 80                | 11168_Cj1279c | 132               | 11168_Cj1349c | 192               |
| 11168_Cj1145c | 51                | 11168_Cj1215  | 90                | 11168_Cj1280c | 110               | 11168_Cj1356c | 90                |
| 11168_Cj1153  | 39                | 11168_Cj1216c | 39                | 11168_Cj1285c | 122               | 11168_Cj1360c | 4                 |
| 11168_Cj1154c | 43                | 11168_Cj1217c | 102               | 11168_Cj1287c | 147               | 11168_Cj1361c | 67                |
| 11168_Cj1155c | 222               | 11168_Cj1219c | 217               | 11168_Cj1289  | 119               | 11168_Cj1365c | 131               |
| 11168_Cj1158c | 58                | 11168_Cj1224  | 65                | 11168_Cj1295  | 258               | 11168_Cj1367c | 163               |
| 11168_Cj1159c | 54                | 11168_Cj1225  | 40                | 11168_Cj1296  | 111               | 11168_Cj1368  | 131               |
| 11168_Cj1160c | 52                | 11168_Cj1226c | 100               | 11168_Cj1297  | 21                | 11168_Cj1369  | 160               |
| 11168_Cj1161c | 237               | 11168_Cj1227c | 55                | 11168_Cj1298  | 104               | 11168_Cj1370  | 96                |
| 11168_Cj1162c | 44                | 11168_Cj1232  | 96                | 11168_Cj1300  | 96                | 11168_Cj1371  | 112               |
| 11168_Cj1163c | 141               | 11168_Cj1233  | 102               | 11168_Cj1301  | 46                | 11168_Cj1372  | 109               |
| 11168_Cj1164c | 56                | 11168_Cj1235  | 129               | 11168_Cj1302  | 158               | 11168_Cj1373  | 174               |
| 11168_Cj1165c | 95                | 11168_Cj1236  | 148               | 11168_Cj1305c | 426               | 11168_Cj1374c | 94                |
| 11168_Cj1166c | 118               | 11168_Cj1237c | 144               | 11168_Cj1306c | 306               | 11168_Cj1375  | 196               |
| 11168_Cj1168c | 134               | 11168_Cj1240c | 100               | 11168_Cj1307  | 162               | 11168_Cj1376  | 34                |

| Locus         | Number of alleles |
|---------------|-------------------|---------------|-------------------|---------------|-------------------|---------------|-------------------|
| 11168_Cj1377c | 153               | 11168_Cj1438c | 12                | 11168_Cj1506c | 176               | 11168_Cj1580c | 97                |
| 11168_Cj1380  | 81                | 11168_Cj1440c | 18                | 11168_Cj1507c | 103               | 11168_Cj1581c | 77                |
| 11168_Cj1381  | 102               | 11168_Cj1442c | 119               | 11168_Cj1513c | 24                | 11168_Cj1582c | 149               |
| 11168_Cj1383c | 81                | 11168_Cj1449c | 92                | 11168_Cj1514c | 88                | 11168_Cj1583c | 179               |
| 11168_Cj1384c | 44                | 11168_Cj1450  | 96                | 11168_Cj1515c | 128               | 11168_Cj1584c | 174               |
| 11168_Cj1386  | 81                | 11168_Cj1452  | 159               | 11168_Cj1516  | 185               | 11168_Cj1585c | 101               |
| 11168_Cj1387c | 93                | 11168_Cj1454c | 166               | 11168_Cj1521c | 69                | 11168_Cj1587c | 178               |
| 11168_Cj1388  | 64                | 11168_Cj1456c | 49                | 11168_Cj1522c | 142               | 11168_Cj1588c | 127               |
| 11168_Cj1394  | 166               | 11168_Cj1459  | 129               | 11168_Cj1523c | 270               | 11168_Cj1589  | 113               |
| 11168_Cj1397  | 31                | 11168_Cj1460  | 73                | 11168_Cj1532  | 100               | 11168_Cj1602  | 71                |
| 11168_Cj1405  | 77                | 11168_Cj1461  | 121               | 11168_Cj1533c | 121               | 11168_Cj1608  | 97                |
| 11168_Cj1406c | 99                | 11168_Cj1465  | 60                | 11168_Cj1534c | 69                | 11168_Cj1609  | 99                |
| 11168_Cj1407c | 150               | 11168_Cj1467  | 99                | 11168_Cj1538c | 139               | 11168_Cj1613c | 90                |
| 11168_Cj1410c | 88                | 11168_Cj1468  | 113               | 11168_Cj1539c | 98                | 11168_Cj1618c | 124               |
| 11168_Cj1411c | 173               | 11168_Cj1472c | 95                | 11168_Cj1540  | 118               | 11168_Cj1621  | 91                |
| 11168_Cj1412c | 214               | 11168_Cj1476c | 181               | 11168_Cj1541  | 87                | 11168_Cj1623  | 87                |
| 11168_Cj1416c | 84                | 11168_Cj1477c | 78                | 11168_Cj1542  | 102               | 11168_Cj1626c | 49                |
| 11168_Cj1417c | 64                | 11168_Cj1481c | 157               | 11168_Cj1543  | 123               | 11168_Cj1627c | 99                |
| 11168_Cj1418c | 147               | 11168_Cj1482c | 206               | 11168_Cj1544c | 138               | 11168_Cj1631c | 119               |
| 11168_Cj1419c | 85                | 11168_Cj1483c | 65                | 11168_Cj1545c | 122               | 11168_Cj1632c | 42                |
| 11168_Cj1420c | 125               | 11168_Cj1484c | 93                | 11168_Cj1546  | 71                | 11168_Cj1633  | 103               |
| 11168_Cj1421c | 19                | 11168_Cj1485c | 20                | 11168_Cj1547  | 110               | 11168_Cj1637c | 106               |
| 11168_Cj1422c | 5                 | 11168_Cj1486c | 33                | 11168_Cj1548c | 147               | 11168_Cj1639  | 43                |
| 11168_Cj1426c | 17                | 11168_Cj1491c | 92                | 11168_Cj1555c | 41                | 11168_Cj1640  | 71                |
| 11168_Cj1427c | 38                | 11168_Cj1492c | 142               | 11168_Cj1556  | 14                | 11168_Cj1642  | 53                |
| 11168_Cj1429c | 58                | 11168_Cj1493c | 90                | 11168_Cj1558  | 22                | 11168_Cj1643  | 86                |
| 11168_Cj1432c | 32                | 11168_Cj1495c | 48                | 11168_Cj1561  | 68                | 11168_Cj1648  | 123               |
| 11168_Cj1433c | 15                | 11168_Cj1496c | 66                | 11168_Cj1562  | 35                | 11168_Cj1649  | 151               |
| 11168_Cj1434c | 22                | 11168_Cj1497c | 54                | 11168_Cj1563c | 100               | 11168_Cj1650  | 86                |
| 11168_Cj1435c | 1                 | 11168_Cj1500  | 111               | 11168_Cj1564  | 63                | 11168_Cj1653c | 78                |
| 11168_Cj1436c | 8                 | 11168_Cj1501  | 45                | 11168_Cj1574c | 65                | 11168_Cj1656c | 24                |
| 11168_Cj1437c | 10                | 11168_Cj1505c | 85                | 11168_Cj1575c | 31                | 11168_Cj1658  | 192               |

| Locus         | Number of alleles | Locus        | Number of alleles | Locus      | Number of alleles | Locus       | Number of alleles |
|---------------|-------------------|--------------|-------------------|------------|-------------------|-------------|-------------------|
| 11168_Cj1660  | 180               | 11168_cjeI   | 332               | 11168_cysQ | 98                | 11168_dsbI  | 141               |
| 11168_Cj1661  | 126               | 11168_clpA   | 135               | 11168_cysS | 137               | 11168_dut   | 120               |
| 11168_Cj1662  | 118               | 11168_clpB   | 157               | 11168_dapA | 97                | 11168_dxr   | 160               |
| 11168_Cj1663  | 76                | 11168_clpP   | 55                | 11168_dapA | 32                | 11168_dxs   | 149               |
| 11168_Cj1664  | 61                | 11168_clpS   | 44                | 11168_dapB | 88                | 11168_efp   | 57                |
| 11168_Cj1665  | 71                | 11168_clpX   | 115               | 11168_dapD | 123               | 11168_engA  | 149               |
| 11168_Cj1666c | 77                | 11168_cmeA   | 123               | 11168_dapE | 150               | 11168_engB  | 62                |
| 11168_Cj1667c | 78                | 11168_cmeB   | 201               | 11168_dapF | 95                | 11168_eno   | 117               |
| 11168_Cj1668c | 54                | 11168_cmeC   | 126               | 11168_dba  | 14                | 11168_era   | 139               |
| 11168_Cj1669c | 106               | 11168_cmeD   | 116               | 11168_dccR | 68                | 11168_exbB1 | 78                |
| 11168_Cj1671c | 15                | 11168_cmeE   | 84                | 11168_dccS | 178               | 11168_exbB2 | 71                |
| 11168_Cj1674  | 106               | 11168_cmeF   | 227               | 11168_dcd  | 80                | 11168_exbB3 | 52                |
| 11168_Cj1677  | 142               | 11168_cmeR   | 106               | 11168_dctA | 139               | 11168_exbD1 | 23                |
| 11168_Cj1679  | 89                | 11168_coaD   | 57                | 11168_dcuA | 119               | 11168_exbD2 | 76                |
| 11168_Cj1680c | 101               | 11168_coaE   | 100               | 11168_dcuB | 150               | 11168_exbD3 | 40                |
| 11168_Cj1684c | 130               | 11168_corA   | 104               | 11168_ddl  | 145               | 11168_exoA  | 86                |
| 11168_Cj1687  | 159               | 11168_crcB   | 54                | 11168_def  | 80                | 11168_fabD  | 94                |
| 11168_Cj1709c | 112               | 11168_csrA   | 12                | 11168_dfp  | 148               | 11168_fabF  | 103               |
| 11168_Cj1710c | 174               | 11168_cstA   | 158               | 11168_dgkA | 115               | 11168_fabG  | 83                |
| 11168_Cj1712  | 86                | 11168_cstIII | 14                | 11168_dnaA | 254               | 11168_fabH  | 95                |
| 11168_Cj1713  | 121               | 11168_ctb    | 57                | 11168_dnaB | 128               | 11168_fabH2 | 133               |
| 11168_Cj1714  | 33                | 11168_ctsD   | 148               | 11168_dnaE | 183               | 11168_fabI  | 113               |
| 11168_Cj1715  | 71                | 11168_ctsE   | 156               | 11168_dnaG | 168               | 11168_fabZ  | 51                |
| 11168_Cj1720  | 108               | 11168_ctsP   | 76                | 11168_dnaJ | 178               | 11168_fba   | 121               |
| 11168_Cj1721c | 12                | 11168_ctsR   | 43                | 11168_dnaK | 186               | 11168_fbp   | 82                |
| 11168_Cj1722c | 2                 | 11168_ctsT   | 33                | 11168_dnaN | 236               | 11168_fcl   | 17                |
| 11168_Cj1723c | 4                 | 11168_cydA   | 146               | 11168_dnaQ | 111               | 11168_fdhA  | 173               |
| 11168_Cj1724c | 108               | 11168_cydB   | 126               | 11168_dnaX | 188               | 11168_fdhB  | 43                |
| 11168_Cj1725  | 36                | 11168_cynT   | 54                | 11168_dprA | 117               | 11168_fdhC  | 81                |
| 11168_Cj1728c | 69                | 11168_cysC   | 66                | 11168_dsbA | 91                | 11168_fdhD  | 118               |
| 11168_cjaA    | 105               | 11168_cysE   | 108               | 11168_dsbB | 106               | 11168_fdxA  | 45                |
| 11168_cjaB    | 200               | 11168_cysM   | 94                | 11168_dsbD | 172               | 11168_fdxB  | 11                |

| Locus       | Number of alleles | Locus      | Number of alleles | Locus       | Number of alleles | Locus      | Number of alleles |
|-------------|-------------------|------------|-------------------|-------------|-------------------|------------|-------------------|
| 11168_feoB  | 207               | 11168_fliI | 100               | 11168_gatB  | 160               | 11168_gyrA | 183               |
| 11168_ffh   | 143               | 11168_fliK | 203               | 11168_gatC  | 56                | 11168_gyrB | 218               |
| 11168_flaA  | 223               | 11168_fliL | 96                | 11168_gidA  | 223               | 11168_hddA | 139               |
| 11168_flaB  | 221               | 11168_fliM | 108               | 11168_glcD  | 137               | 11168_hddC | 105               |
| 11168_flaC  | 89                | 11168_fliN | 27                | 11168_glf   | 11                | 11168_hddC | 16                |
| 11168_flaG  | 65                | 11168_fliP | 111               | 11168_glmM  | 105               | 11168_hemA | 154               |
| 11168 fldA  | 71                | 11168_fliQ | 41                | 11168_glmS  | 172               | 11168_hemB | 111               |
| 11168_flgA  | 100               | 11168_fliR | 112               | 11168_glmU  | 141               | 11168_hemC | 109               |
| 11168_flgB  | 50                | 11168_fliS | 44                | 11168_glnA  | 129               | 11168_hemD | 74                |
| 11168_flgC  | 59                | 11168_fliY | 104               | 11168_glnH  | 102               | 11168_hemE | 128               |
| 11168_flgD  | 93                | 11168_fmt  | 84                | 11168_glnP  | 148               | 11168_hemH | 149               |
| 11168_flgE  | 145               | 11168_folB | 73                | 11168_glnQ  | 87                | 11168_hemL | 122               |
| 11168_flgE  | 114               | 11168_folC | 153               | 11168_gltA  | 107               | 11168_hemN | 117               |
| 11168_flgG  | 61                | 11168_folD | 87                | 11168_gltB  | 289               | 11168_hipO | 143               |
| 11168_flgG2 | 85                | 11168_folE | 95                | 11168_gltD  | 147               | 11168_hisA | 107               |
| 11168_flgH  | 105               | 11168_folK | 51                | 11168_gltX  | 148               | 11168_hisB | 116               |
| 11168_flgI  | 112               | 11168_folP | 126               | 11168_gltX  | 133               | 11168_hisC | 118               |
| 11168_flgJ  | 70                | 11168_frdA | 118               | 11168_glyA  | 99                | 11168_hisD | 111               |
| 11168_flgK  | 141               | 11168_frdB | 66                | 11168_glyQ  | 89                | 11168_hisF | 117               |
| 11168_flgL  | 144               | 11168_frdC | 104               | 11168_glyS  | 202               | 11168_hisF | 88                |
| 11168_flgM  | 39                | 11168_frr  | 78                | 11168_gmhA  | 134               | 11168_hisG | 81                |
| 11168_flgR  | 190               | 11168_ftsA | 118               | 11168_gmhA2 | 101               | 11168_hisH | 125               |
| 11168_flgS  | 122               | 11168_ftsH | 120               | 11168_gmhB  | 130               | 11168_hisH | 65                |
| 11168_flhA  | 139               | 11168_ftsK | 221               | 11168_gmk   | 106               | 11168_hisI | 80                |
| 11168_flhB  | 102               | 11168_ftsY | 113               | 11168_gne   | 129               | 11168_hisJ | 138               |
| 11168_flhF  | 122               | 11168_ftsZ | 98                | 11168_gpsA  | 120               | 11168_hisS | 117               |
| 11168_fliA  | 72                | 11168_fumC | 175               | 11168_greA  | 61                | 11168_hldD | 115               |
| 11168_fliD  | 174               | 11168_fur  | 54                | 11168_groEL | 128               | 11168_hldE | 154               |
| 11168_fliE  | 28                | 11168_fusA | 135               | 11168_groES | 30                | 11168_hom  | 140               |
| 11168_fliF  | 133               | 11168_galU | 88                | 11168_grpE  | 92                | 11168_hrcA | 95                |
| 11168_fliG  | 77                | 11168_gapA | 124               | 11168_guaA  | 146               | 11168_hsdM | 22                |
| 11168_fliH  | 90                | 11168_gatA | 171               | 11168_guaB  | 137               | 11168_hsdR | 35                |

| Locus       | Number of alleles |
|-------------|-------------------|-------------|-------------------|-------------|-------------------|-------------|-------------------|
| 11168_hsdS  | 15                | 11168_iscS  | 91                | 11168_leuS  | 196               | 11168_metC' | 29                |
| 11168_hslU  | 167               | 11168_ispA  | 93                | 11168_lgt   | 72                | 11168_metE  | 153               |
| 11168_hslV  | 69                | 11168_ispDF | 121               | 11168_ligA  | 177               | 11168_metF  | 93                |
| 11168_hspR  | 65                | 11168_ispG  | 131               | 11168_livF  | 67                | 11168_metG  | 166               |
| 11168_htpG  | 156               | 11168_ispH  | 102               | 11168_livG  | 69                | 11168_metK  | 100               |
| 11168_htrA  | 127               | 11168_katA  | 121               | 11168_livH  | 89                | 11168_mfd   | 259               |
| 11168_htrB  | 195               | 11168_kdpB  | 264               | 11168_livJ  | 111               | 11168_miaA  | 86                |
| 11168_hupB  | 31                | 11168_kdpD  | 204               | 11168_livK  | 101               | 11168_miaB  | 112               |
| 11168_hydA  | 103               | 11168_kdsA  | 82                | 11168_livM  | 118               | 11168_mloB  | 17                |
| 11168_hydA2 | 170               | 11168_kdsB  | 86                | 11168_lolA  | 91                | 11168_mnmA  | 111               |
| 11168_hydB  | 147               | 11168_kdtA  | 123               | 11168_lon   | 140               | 11168_mnmC  | 195               |
| 11168_hydC  | 95                | 11168_kefB  | 166               | 11168_lpxA  | 92                | 11168_moaA  | 88                |
| 11168_hydD  | 101               | 11168_kfiD  | 9                 | 11168_lpxB  | 118               | 11168_moaC  | 77                |
| 11168_hypA  | 84                | 11168_kgtP  | 148               | 11168_lpxC  | 87                | 11168_moaD  | 37                |
| 11168_hypB  | 125               | 11168_kpsC  | 226               | 11168_lpxD  | 102               | 11168_moaE  | 87                |
| 11168_hypC  | 61                | 11168_kpsD  | 168               | 11168_lpxK  | 124               | 11168_mobA  | 78                |
| 11168_hypD  | 144               | 11168_kpsE  | 128               | 11168_lspA  | 82                | 11168_mobB  | 76                |
| 11168_hypE  | 140               | 11168_kpsF  | 144               | 11168_lysA  | 105               | 11168_modA  | 85                |
| 11168_hypF  | 205               | 11168_kpsM  | 171               | 11168_lysC  | 126               | 11168_modB  | 108               |
| 11168_iamA  | 112               | 11168_kpsS  | 217               | 11168_lysS  | 111               | 11168_modC  | 133               |
| 11168_iamB  | 128               | 11168_kpsT  | 99                | 11168_maf   | 54                | 11168_moeA  | 133               |
| 11168_icd   | 144               | 11168_ksgA  | 82                | 11168_maf1  | 156               | 11168_moeA2 | 157               |
| 11168_ileS  | 212               | 11168_ktrA  | 70                | 11168_maf3  | 201               | 11168_moeB  | 118               |
| 11168_ilvA  | 144               | 11168_ktrB  | 120               | 11168_maf4  | 155               | 11168_mogA  | 85                |
| 11168_ilvC  | 124               | 11168_lctP  | 118               | 11168_maf6  | 246               | 11168_motA  | 73                |
| 11168_ilvD  | 151               | 11168_ldh   | 133               | 11168_maf7  | 239               | 11168_motB  | 94                |
| 11168_ilvE  | 89                | 11168_lepA  | 150               | 11168_map   | 99                | 11168_mqo   | 125               |
| 11168_ilvH  | 62                | 11168_lepP  | 114               | 11168_mapA  | 72                | 11168_mraW  | 133               |
| 11168_ilvI  | 131               | 11168_leuA  | 188               | 11168_mdh   | 108               | 11168_mraY  | 151               |
| 11168_infA  | 13                | 11168_leuB  | 126               | 11168_metA  | 64                | 11168_mrdB  | 130               |
| 11168_infB  | 259               | 11168_leuC  | 121               | 11168_metB  | 77                | 11168_mreB  | 117               |
| 11168_infC  | 43                | 11168_leuD  | 94                | 11168_metC' | 121               | 11168_mreC  | 84                |

| Locus       | Number of alleles | Locus       | Number of alleles | Locus          | Number of alleles | Locus      | Number of alleles |
|-------------|-------------------|-------------|-------------------|----------------|-------------------|------------|-------------------|
| 11168_mrp   | 100               | 11168_nrfA  | 173               | 11168_panD     | 31                | 11168_pglK | 213               |
| 11168_mrsA  | 73                | 11168_nrfH  | 63                | 11168_pbpA     | 120               | 11168_pgm  | 122               |
| 11168_msbA  | 178               | 11168_nssR  | 84                | 11168_pbpB     | 141               | 11168_pgpA | 78                |
| 11168_murA  | 147               | 11168_nth   | 59                | 11168_pbpC     | 136               | 11168_pgsA | 104               |
| 11168_murB  | 123               | 11168_nuoA  | 84                | 11168_pckA     | 103               | 11168_pheA | 96                |
| 11168_murC  | 146               | 11168_nuoB  | 66                | 11168_pcm      | 78                | 11168_pheS | 95                |
| 11168_murD  | 141               | 11168_nuoC  | 130               | 11168_pdxA     | 193               | 11168_pheT | 154               |
| 11168_murE  | 128               | 11168_nuoD  | 98                | 11168_pdxJ     | 102               | 11168_pldA | 140               |
| 11168_murF  | 177               | 11168_nuoG  | 188               | 11168_peg1A    | 100               | 11168_plsC | 101               |
| 11168_murG  | 116               | 11168_nuoH  | 133               | 11168_peg2     | 104               | 11168_plsX | 95                |
| 11168_murI  | 88                | 11168_nuoI  | 92                | 11168_peg3     | 91                | 11168_pnk  | 100               |
| 11168_mutS  | 238               | 11168_nuoJ  | 111               | 11168_peg4cbf2 | 91                | 11168_pnp  | 262               |
| 11168_mutY  | 138               | 11168_nuoK  | 73                | 11168_pegC     | 81                | 11168_polA | 162               |
| 11168_nadD  | 91                | 11168_nuoL  | 204               | 11168_pepA     | 120               | 11168_porA | 302               |
| 11168_nadE  | 84                | 11168_nuoM  | 175               | 11168_perR     | 67                | 11168_ppa  | 79                |
| 11168_napA  | 177               | 11168_nuoN  | 163               | 11168_petA     | 61                | 11168_ppi  | 109               |
| 11168_napB  | 54                | 11168_nusA  | 78                | 11168_petB     | 110               | 11168_ppk  | 181               |
| 11168_napD  | 47                | 11168_nusB  | 70                | 11168_petC     | 131               | 11168_prfA | 111               |
| 11168_napG  | 108               | 11168_nusG  | 25                | 11168_pflA     | 216               | 11168_prfB | 148               |
| 11168_napH  | 93                | 11168_obgE  | 83                | 11168_pfs      | 82                | 11168_priA | 194               |
| 11168_napL  | 103               | 11168_ogt   | 74                | 11168_pgi      | 123               | 11168_prmA | 96                |
| 11168_ndk   | 48                | 11168_omp50 | 239               | 11168_pgk      | 110               | 11168_proA | 131               |
| 11168_neuA1 | 56                | 11168_oorA  | 103               | 11168_pglA     | 150               | 11168_proB | 90                |
| 11168_neuB1 | 16                | 11168_oorB  | 78                | 11168_pglB     | 210               | 11168_proC | 90                |
| 11168_neuB2 | 185               | 11168_oorC  | 58                | 11168_pglC     | 100               | 11168_proS | 143               |
| 11168_neuC1 | 14                | 11168_oorD  | 56                | 11168_pglD     | 86                | 11168_prsA | 78                |
| 11168_neuC2 | 184               | 11168_p19   | 73                | 11168_pglE     | 99                | 11168_psd  | 92                |
| 11168_nhaA  | 128               | 11168_pabA  | 130               | 11168_pglF     | 195               | 11168_pseA | 160               |
| 11168_nhaA1 | 118               | 11168_pabB  | 190               | 11168_pglG     | 89                | 11168_pseB | 141               |
| 11168_npdA  | 147               | 11168_pal   | 57                | 11168_pglH     | 116               | 11168_pseC | 166               |
| 11168_nrdA  | 185               | 11168_panB  | 45                | 11168_pglI     | 114               | 11168_pseD | 216               |
| 11168_nrdF  | 88                | 11168_panC  | 50                | 11168_pglJ     | 123               | 11168_pseE | 244               |

| Locus      | Number of alleles | Locus       | Number of alleles | Locus      | Number of alleles | Locus      | Number of alleles |
|------------|-------------------|-------------|-------------------|------------|-------------------|------------|-------------------|
| 11168_pseF | 115               | 11168_pyrB  | 122               | 11168_rnhA | 33                | 11168_rpmH | 19                |
| 11168_pseG | 113               | 11168_pyrC  | 88                | 11168_rnhB | 102               | 11168_rpmI | 13                |
| 11168_pseH | 97                | 11168_pyrC2 | 126               | 11168_rnpA | 45                | 11168_rpmJ | 6                 |
| 11168_pseI | 193               | 11168_pyrD  | 114               | 11168_rpiB | 45                | 11168_rpoA | 74                |
| 11168_pspA | 110               | 11168_pyrE  | 71                | 11168_rplA | 75                | 11168_rpoB | 167               |
| 11168_pssA | 88                | 11168_pyrF  | 82                | 11168_rplB | 88                | 11168_rpoC | 180               |
| 11168_pstA | 172               | 11168_pyrG  | 130               | 11168_rplC | 62                | 11168_rpoD | 151               |
| 11168_pstB | 109               | 11168_pyrH  | 64                | 11168_rplD | 78                | 11168_rpoN | 147               |
| 11168_pstC | 123               | 11168_queA  | 103               | 11168_rplE | 48                | 11168_rpoZ | 34                |
| 11168_pstS | 139               | 11168_racR  | 81                | 11168_rplF | 37                | 11168_rpsA | 131               |
| 11168_pta  | 153               | 11168_racS  | 166               | 11168_rplI | 72                | 11168_rpsB | 80                |
| 11168_pth  | 60                | 11168_radA  | 123               | 11168_rplJ | 51                | 11168_rpsC | 59                |
| 11168_ptmA | 107               | 11168_rbfA  | 77                | 11168_rplK | 31                | 11168_rpsD | 58                |
| 11168_ptmB | 127               | 11168_rbn   | 79                | 11168_rplL | 42                | 11168_rpsE | 81                |
| 11168_purA | 93                | 11168_rdxA  | 127               | 11168_rplM | 38                | 11168_rpsF | 44                |
| 11168_purB | 145               | 11168_recA  | 83                | 11168_rplN | 33                | 11168_rpsG | 78                |
| 11168_purC | 91                | 11168_recG  | 142               | 11168_rplO | 32                | 11168_rpsH | 32                |
| 11168_purD | 128               | 11168_recJ  | 149               | 11168_rplP | 27                | 11168_rpsI | 40                |
| 11168_purE | 75                | 11168_recN  | 188               | 11168_rplQ | 48                | 11168_rpsJ | 21                |
| 11168_purF | 115               | 11168_recR  | 84                | 11168_rplR | 40                | 11168_rpsK | 41                |
| 11168_purH | 114               | 11168_rep   | 79                | 11168_rplS | 47                | 11168_rpsL | 34                |
| 11168_purL | 133               | 11168_rfbC  | 72                | 11168_rplT | 76                | 11168_rpsM | 27                |
| 11168_purM | 137               | 11168_rho   | 146               | 11168_rplU | 27                | 11168_rpsN | 22                |
| 11168_purN | 96                | 11168_ribA  | 102               | 11168_rplV | 72                | 11168_rpsO | 48                |
| 11168_purQ | 83                | 11168_ribA  | 83                | 11168_rplW | 29                | 11168_rpsP | 28                |
| 11168_purS | 48                | 11168_ribA  | 62                | 11168_rplX | 18                | 11168_rpsQ | 13                |
| 11168_purU | 107               | 11168_ribD  | 120               | 11168_rpmA | 34                | 11168_rpsR | 23                |
| 11168_putA | 211               | 11168_ribF  | 90                | 11168_rpmB | 23                | 11168_rpsS | 29                |
| 11168_putP | 119               | 11168_ribH  | 61                | 11168_rpmC | 13                | 11168_rpsT | 26                |
| 11168_pycA | 103               | 11168_rimM  | 77                | 11168_rpmE | 21                | 11168_rpsU | 31                |
| 11168_pycB | 163               | 11168_rloH  | 22                | 11168_rpmF | 14                | 11168_rrc  | 121               |
| 11168_pyk  | 140               | 11168_rnc   | 74                | 11168_rpmG | 16                | 11168_ruvA | 87                |

| Locus      | Number of alleles | Locus       | Number of alleles | Locus       | Number of alleles | Locus          | Number of alleles |
|------------|-------------------|-------------|-------------------|-------------|-------------------|----------------|-------------------|
| 11168_ruvB | 139               | 11168_tgt   | 106               | 11168_trpD  | 116               | 11168_xseA     | 117               |
| 11168_ruvC | 169               | 11168_thiC  | 128               | 11168_trpE  | 108               | 11168_yajC     | 28                |
| 11168_sdaA | 139               | 11168_thiD  | 100               | 11168_trpF  | 78                | Cj_81-176_0040 | 8                 |
| 11168_sdaC | 118               | 11168_thiE  | 76                | 11168_trpS  | 85                | Cj_81-176_0175 | 36                |
| 11168_sdhA | 163               | 11168_thiG  | 116               | 11168_truA  | 100               | Cj_81-176_0180 | 32                |
| 11168_sdhB | 117               | 11168_thiH  | 112               | 11168_truB  | 116               | Cj_81-176_0185 | 21                |
| 11168_sdhC | 92                | 11168_thiJ  | 68                | 11168_truD  | 147               | Cj_81-176_0200 | 38                |
| 11168_secA | 189               | 11168_thiL  | 115               | 11168_trxA  | 38                | Cj_81-176_0210 | 2                 |
| 11168_secD | 142               | 11168_thiS  | 49                | 11168_trxB  | 120               | Cj_81-176_0215 | 5                 |
| 11168_secE | 21                | 11168_thrB  | 104               | 11168_tsf   | 149               | Cj_81-176_0295 | 89                |
| 11168_secF | 111               | 11168_thrC  | 123               | 11168_tuf   | 71                | Cj_81-176_0305 | 73                |
| 11168_secG | 62                | 11168_thrS  | 167               | 11168_typA  | 200               | Cj_81-176_0315 | 68                |
| 11168_secY | 83                | 11168_thyX  | 74                | 11168_tyrA  | 65                | Cj_81-176_0320 | 31                |
| 11168_selA | 130               | 11168_tig   | 106               | 11168_tyrS  | 147               | Cj_81-176_0325 | 104               |
| 11168_selB | 171               | 11168_tilS  | 163               | 11168_ubiA  | 92                | Cj_81-176_0435 | 75                |
| 11168_selD | 94                | 11168_tkt   | 200               | 11168_ubiD  | 154               | Cj_81-176_1180 | 89                |
| 11168_serA | 122               | 11168_tlyA  | 109               | 11168_ubiE  | 111               | Cj_81-176_1185 | 45                |
| 11168_serB | 63                | 11168_tmk   | 79                | 11168_ung   | 80                | Cj_81-176_1190 | 86                |
| 11168_serC | 116               | 11168_tolB  | 121               | 11168_upp   | 102               | Cj_81-176_1195 | 63                |
| 11168_serS | 119               | 11168_tonB1 | 88                | 11168_uppP  | 98                | Cj_81-176_1210 | 29                |
| 11168_slyD | 89                | 11168_tonB2 | 129               | 11168_uppS  | 74                | Cj_81-176_1570 | 146               |
| 11168_smpB | 77                | 11168_tonB3 | 65                | 11168_uvrA  | 209               | Cj_81-176_1985 | 28                |
| 11168_sodB | 82                | 11168_topA  | 164               | 11168_uvrB  | 218               | Cj_81-176_2355 | 198               |
| 11168_speA | 177               | 11168_tpiA  | 98                | 11168_uvrC  | 180               | Cj_81-176_2975 | 30                |
| 11168_spoT | 139               | 11168_tpx   | 67                | 11168_uxaA' | 47                | Cj_81-176_2980 | 28                |
| 11168_ssb  | 69                | 11168_trmA  | 144               | 11168_uxaA' | 18                | Cj_81-176_2985 | 30                |
| 11168_sucC | 90                | 11168_trmB  | 110               | 11168_valS  | 181               | Cj_81-176_3085 | 138               |
| 11168_sucD | 103               | 11168_trmD  | 108               | 11168_waaC  | 161               | Cj_81-176_3310 | 12                |
| 11168_surE | 122               | 11168_trmE  | 119               | 11168_waaF  | 157               | Cj_81-176_3315 | 21                |
| 11168_tal  | 144               | 11168_trpA  | 80                | 11168_waaV  | 134               | Cj_81-176_3455 | 122               |
| 11168_tatA | 41                | 11168_trpB  | 124               | 11168_wlaN  | 45                | Cj_81-176_3460 | 85                |
| 11168_tatC | 103               | 11168_trpC  | 93                | 11168_xerD  | 145               | Cj_81-176_3470 | 155               |



| Locus          | Number of alleles | Locus          | Number of alleles | Locus        | Number of alleles | Locus        | Number of alleles |
|----------------|-------------------|----------------|-------------------|--------------|-------------------|--------------|-------------------|
| Cj_81-176_3545 | 258               | Cj_81-176_7205 | 6                 | Cj81116_0266 | 24                | Cj81116_1085 | 45                |
| Cj_81-176_3555 | 123               | Cj_81-176_7310 | 154               | Cj81116_0267 | 31                | Cj81116_1088 | 24                |
| Cj_81-176_3910 | 32                | Cj_81-176_7325 | 149               | Cj81116_0321 | 30                | Cj81116_1089 | 27                |
| Cj_81-176_3935 | 150               | Cj_81-176_7470 | 2                 | Cj81116_0398 | 21                | Cj81116_1090 | 24                |
| Cj_81-176_3950 | 59                | Cj_81-176_7495 | 158               | Cj81116_0399 | 14                | Cj81116_1093 | 22                |
| Cj_81-176_3970 | 64                | Cj_81-176_7500 | 51                | Cj81116_0400 | 25                | Cj81116_1094 | 26                |
| Cj_81-176_3975 | 12                | Cj_81-176_7515 | 1                 | Cj81116_0526 | 69                | Cj81116_1247 | 3                 |
| Cj_81-176_3980 | 6                 | Cj_81-176_7530 | 2                 | Cj81116_0549 | 138               | Cj81116_1278 | 217               |
| Cj_81-176_3985 | 13                | Cj_81-176_7535 | 2                 | Cj81116_0643 | 8                 | Cj81116_1329 | 4                 |
| Cj_81-176_3990 | 77                | Cj_81-176_7540 | 10                | Cj81116_0644 | 13                | Cj81116_1330 | 11                |
| Cj_81-176_4570 | 230               | Cj_81-176_7715 | 179               | Cj81116_0647 | 12                | Cj81116_1331 | 5                 |
| Cj_81-176_4900 | 16                | Cj_81-176_8000 | 1                 | Cj81116_0648 | 50                | Cj81116_1332 | 9                 |
| Cj_81-176_4910 | 32                | Cj_81-176_8005 | 1                 | Cj81116_0649 | 131               | Cj81116_1334 | 3                 |
| Cj_81-176_4915 | 22                | Cj_81-176_8175 | 42                | Cj81116_0650 | 10                | Cj81116_1335 | 4                 |
| Cj_81-176_4920 | 9                 | Cj_81-176_8305 | 83                | Cj81116_0651 | 9                 | Cj81116_1336 | 5                 |
| Cj_81-176_4925 | 23                | Cj_81-176_8310 | 58                | Cj81116_0653 | 16                | Cj81116_1337 | 2                 |
| Cj_81-176_4945 | 49                | Cj_81-176_8315 | 57                | Cj81116_0877 | 92                | Cj81116_1340 | 4                 |
| Cj_81-176_5635 | 214               | Cj_81-176_8320 | 53                | Cj81116_0878 | 133               | Cj81116_1341 | 1                 |
| Cj_81-176_6040 | 10                | Cj_81-176_8720 | 80                | Cj81116_0985 | 34                | Cj81116_1343 | 51                |
| Cj_81-176_6065 | 46                | Cj_81-176_8885 | 19                | Cj81116_0986 | 23                | Cj81116_1344 | 48                |
| Cj_81-176_6070 | 53                | Cj_81-176_8900 | 11                | Cj81116_0987 | 25                | Cj81116_1345 | 49                |
| Cj_81-176_6075 | 65                | Cj_81-176_8905 | 9                 | Cj81116_0988 | 50                | Cj81116_1346 | 40                |
| Cj_81-176_6090 | 39                | Cj_81-176_9050 | 61                | Cj81116_1075 | 39                | Cj81116_1347 | 9                 |
| Cj_81-176_6890 | 5                 | Cj81116_0032   | 45                | Cj81116_1076 | 26                | Cj81116_1348 | 5                 |
| Cj_81-176_6895 | 9                 | Cj81116_0035   | 22                | Cj81116_1077 | 20                | Cj81116_1349 | 14                |
| Cj_81-176_6905 | 7                 | Cj81116_0036   | 23                | Cj81116_1078 | 51                | Cj81116_1426 | 225               |
| Cj_81-176_6910 | 10                | Cj81116_0132   | 6                 | Cj81116_1079 | 16                | Cj81116_1427 | 6                 |
| Cj_81-176_6945 | 20                | Cj81116_0133   | 6                 | Cj81116_1080 | 35                | Cj81116_1448 | 154               |
| Cj_81-176_6960 | 39                | Cj81116_0140   | 39                | Cj81116_1081 | 8                 | Cj81116_1449 | 26                |
| Cj_81-176_7030 | 18                | Cj81116_0141   | 41                | Cj81116_1082 | 47                | Cj81116_1450 | 31                |
| Cj_81-176_7125 | 13                | Cj81116_0142   | 48                | Cj81116_1083 | 18                | Cj81116_1451 | 52                |
| Cj_81-176_7130 | 12                | Cj81116_0265   | 39                | Cj81116_1084 | 37                | Cj81116_1453 | 87                |

| Locus        | Number of alleles |
|--------------|-------------------|
| Cj81116_1454 | 108               |
| Cj81116_1455 | 88                |
| Cj81116_1456 | 22                |
| Cj81116_1459 | 24                |
| Cj81116_1585 | 14                |
| Cj81116_1586 | 16                |
| Cj81116_1587 | 24                |
| Cj81116_1588 | 7                 |
| Cj81116_1589 | 17                |
| Cj81116_1590 | 11                |
| Cj81116_1591 | 36                |
| Cj81116_1619 | 17                |
| Cj81116_arsC | 15                |
| Cj81116_hsdM | 121               |
| CJM1_0041    | 36                |
| CJM1_0278    | 33                |
| CJM1_0564    | 138               |
| CJM1_0745    | 4                 |
| CJM1_1118    | 3                 |
| CJM1_1119    | 1                 |
| CJM1_1120    | 4                 |
| CJM1_1372    | 1                 |
| CJM1_1373    | 2                 |
| CJM1_1376    | 2                 |
| CJM1_1377    | 4                 |
| CJM1_1378    | 3                 |
| CJM1_1381    | 2                 |
| CJM1_1382    | 2                 |
| CJM1_rfbF    | 12                |
| CJM1_rfbH    | 2                 |

## References

**Yahara K, Méric G, Taylor AJ, de Vries SP, Murray S, Pascoe B, Mageiros L, Torralbo A, Vidal A, Ridley AM.** 2016. Genome-wide association of functional traits linked with *Campylobacter jejuni* survival from farm to fork. PeerJ Preprints.

**Sheppard SK, Didelot X, Méric G, Torralbo A, Jolley KA, Kelly DJ, Bentley SD, Maiden MC, Parkhill J, Falush D.** 2013. Genome-wide association study identifies vitamin B5 biosynthesis as a host specificity factor in *Campylobacter*. Proc Natl Acad Sci U S A **110**:11923-11927.

**Pascoe B MG, Yahara K, Wimalalathna H, Murray S, Hitchings MD, Sproston EL, Carrillo CD, Taboada EN, Cooper KK, Huynh S, Cody AJ, Jolley KA, Maiden MC, McCarthy ND, Didelot X, Parker C, Sheppard SK.** 2016. Local genes for local bacteria: evidence of allopatry in the genomes of transatlantic *Campylobacter* populations. PeerJ Preprints **4**:e2638v2631.
